# Supplementary material
Source: PubMed Central journal article supplement (PMC2657434)
Supplement: 0900563106_ST2_PDF.pdf [file 0900563106_ST2_PDF.pdf]

Table S2

| Entrez GeneID | Symbol    | Glomeruli | Inner cortex | Outer cortex | Inner medulla | Outer medulla | Pap tips | Pelvis | RefSeq/GeneBank ID | Average Ab. Immune Response Signal Intensity | CV   | Positive Ab. Signal Intensity across 18 pts (%) |
|---------------|-----------|-----------|--------------|--------------|---------------|---------------|----------|--------|--------------------|----------------------------------------------|------|-------------------------------------------------|
| 9459          | ARHGEF6   | Y         |              |              |               |               |          | Y      | BC039856           | 64.06                                        | 1.01 | 100%                                            |
| 9463          | PICK1     |           |              |              |               |               |          |        | NM_012407          | 55.00                                        | 1.24 | 100%                                            |
| 11047         | ADRM1     |           |              |              |               |               |          |        | NM_007002          | 262.75                                       | 1.01 | 94%                                             |
| 9076          | CLDN1     |           |              |              |               |               | Y        |        | NM_021101          | 54.94                                        | 1.20 | 94%                                             |
| 60491         | NIF3L1    |           |              |              |               |               |          | Y      | BC007654           | 137.53                                       | 1.28 | 94%                                             |
| 8495          | PPFIBP2   |           |              |              |               |               |          | Y      | NM_003621          | 532.67                                       | 1.54 | 94%                                             |
| 27245         | AHDC1     |           |              |              |               |               |          |        | BC002677           | 75.64                                        | 1.08 | 89%                                             |
| 2026          | ENO2      |           |              |              |               |               |          |        | NM_001975          | 36.47                                        | 1.12 | 89%                                             |
| 55847         | CISD1     |           |              | Y            |               |               |          |        | NM_018464          | 54.06                                        | 1.14 | 89%                                             |
| 10231         | DSCR1L1   |           |              |              |               |               |          |        | BC038509           | 71.42                                        | 1.14 | 89%                                             |
| 6515          | SLC2A3    |           |              |              |               |               |          |        | NM_006931          | 77.08                                        | 1.16 | 89%                                             |
| 57834         | CYP4F11   |           | Y            | Y            |               |               |          |        | BC016853           | 46.25                                        | 1.21 | 89%                                             |
| 6428          | SFRS3     |           |              |              |               |               |          |        | BC000914           | 195.61                                       | 1.22 | 89%                                             |
| 11199         | ANXA10    |           |              |              |               |               |          | Y      | BC007320           | 282.92                                       | 1.24 | 89%                                             |
| 9815          | GIT2      |           |              |              |               |               |          |        | NM_139201          | 56.44                                        | 1.27 | 89%                                             |
| 5191          | PEX7      |           |              | Y            |               |               |          |        | BC031606           | 41.25                                        | 1.29 | 89%                                             |
| 6788          | STK3      |           |              |              |               |               |          |        | NM_006281          | 68.78                                        | 1.31 | 89%                                             |
| 2041          | EPHA1     |           |              |              |               |               |          |        | NM_005232          | 61.42                                        | 1.32 | 89%                                             |
| 9701          | SAPS2     |           |              |              |               |               |          |        | BC052995           | 130.28                                       | 1.32 | 89%                                             |
| 51444         | RNF138    |           |              |              |               |               |          |        | NM_016271          | 205.36                                       | 1.35 | 89%                                             |
| 139212        | CXorf41   |           |              |              |               |               |          |        | NM_173494          | 149.33                                       | 1.39 | 89%                                             |
| 6533          | SLC6A6    |           |              | Y            |               |               |          |        | BC006252           | 151.06                                       | 1.44 | 89%                                             |
| 1500          | CTNND1    | Y         |              |              |               |               |          |        | BC010501           | 590.69                                       | 1.48 | 89%                                             |
| 11275         | KLHL2     |           |              |              |               |               |          |        | NM_007246          | 37.75                                        | 1.48 | 89%                                             |
| 9240          | PNMA1     |           |              |              |               |               |          |        | BC039577           | 78.89                                        | 1.54 | 89%                                             |
| 6199          | RPS6KB2   |           |              |              |               |               |          |        | BC006106           | 55.36                                        | 1.55 | 89%                                             |
| 2184          | FAH       |           | Y            | Y            |               |               |          |        | NM_000137          | 156.19                                       | 1.60 | 89%                                             |
| 55172         | C14orf104 |           |              |              |               |               |          |        | BC011400           | 34.81                                        | 1.62 | 89%                                             |
| 83695         | C12orf32  |           |              |              |               |               |          |        | NM_031465          | 193.42                                       | 1.81 | 89%                                             |
| 23648         | SSBP3     |           |              |              |               |               |          |        | NM_018070          | 142.92                                       | 1.96 | 89%                                             |
| 9943          | OXR1      |           |              |              |               |               |          |        | BC008726           | 54.03                                        | 2.08 | 89%                                             |
| 6430          | SFRS5     |           |              | Y            |               |               |          |        | BC018823           | 106.00                                       | 2.14 | 89%                                             |
| 6198          | RPS6KB1   |           |              |              |               |               |          |        | BC053365           | 157.72                                       | 2.28 | 89%                                             |
| 55109         | AGGF1     |           |              |              |               |               |          |        | BC029382           | 44.86                                        | 1.02 | 83%                                             |
| 23295         | MGRN1     |           |              |              |               |               |          |        | NM_015246          | 130.81                                       | 1.09 | 83%                                             |
| 5372          | PMM1      |           | Y            | Y            |               |               |          |        | BC010855           | 54.14                                        | 1.12 | 83%                                             |
| 8412          | BCAR3     |           |              |              |               |               |          |        | BC039895           | 161.81                                       | 1.13 | 83%                                             |
| 124491        | TMEM170   |           |              |              |               |               |          |        | NM_145254          | 37.44                                        | 1.13 | 83%                                             |
| 9276          | COPB2     |           |              |              |               |               |          |        | NM_004766          | 26.75                                        | 1.21 | 83%                                             |
| 5426          | POLE      |           |              |              |               |               |          |        | BC021559           | 58.78                                        | 1.21 | 83%                                             |
| 9179          | AP4M1     |           |              |              |               |               |          |        | NM_004722          | 31.67                                        | 1.23 | 83%                                             |
| 5859          | QARS      |           |              |              |               |               |          |        | BC016634           | 39.11                                        | 1.24 | 83%                                             |
| 10454         | MAP3K7IP1 |           |              |              |               |               |          |        | NM_006116          | 132.39                                       | 1.25 | 83%                                             |

|        |           |  |   |   |  |   |  |   |              |        |      |     |
|--------|-----------|--|---|---|--|---|--|---|--------------|--------|------|-----|
| 50861  | STMN3     |  |   |   |  |   |  | Y | NM_015894    | 69.11  | 1.27 | 83% |
| 2139   | EYA2      |  |   |   |  |   |  |   | BC008803     | 19.81  | 1.27 | 83% |
| 286133 | SCARA5    |  |   |   |  |   |  | Y | BC033153     | 61.03  | 1.28 | 83% |
| 135932 | TMEM139   |  |   |   |  |   |  |   | NM_153345    | 27.42  | 1.29 | 83% |
| 84513  | PPAPDC1B  |  |   |   |  |   |  |   | BC033025     | 55.67  | 1.30 | 83% |
| 140691 | TRIM69    |  |   |   |  |   |  |   | BC047945     | 53.08  | 1.31 | 83% |
| 23558  | WBP2      |  |   |   |  |   |  |   | NM_012478    | 108.94 | 1.32 | 83% |
| 4255   | MGMT      |  |   |   |  |   |  |   | NM_002412    | 98.69  | 1.32 | 83% |
| 6747   | SSR3      |  |   |   |  |   |  |   | NM_007107    | 71.58  | 1.32 | 83% |
| 159091 | FAM122C   |  |   |   |  |   |  |   | NM_138819    | 42.44  | 1.34 | 83% |
| 3553   | IL1B      |  |   |   |  |   |  |   | NM_000576    | 82.39  | 1.34 | 83% |
| 202051 | LOC202051 |  |   |   |  |   |  |   | BC050563     | 108.64 | 1.36 | 83% |
| 387338 | NSUN4     |  |   |   |  |   |  |   | BC014441     | 77.33  | 1.36 | 83% |
| 25970  | SH2B1     |  |   |   |  |   |  |   | BC010704     | 30.39  | 1.37 | 83% |
| 10456  | HAX1      |  |   |   |  |   |  |   | NM_006118    | 79.78  | 1.38 | 83% |
| 2823   | GPM6A     |  |   |   |  |   |  |   | BC044612     | 81.56  | 1.38 | 83% |
| 10785  | WDR4      |  |   |   |  |   |  | Y | NM_033661    | 34.86  | 1.38 | 83% |
| 389434 | IYD       |  | Y | Y |  |   |  |   | BC056253     | 28.50  | 1.39 | 83% |
| 5218   | PFTK1     |  |   |   |  |   |  |   | NM_012395    | 78.22  | 1.40 | 83% |
| 8563   | THOC5     |  |   |   |  |   |  |   | BC003615     | 47.03  | 1.42 | 83% |
| 80262  | C16orf70  |  |   |   |  |   |  |   | NM_025187    | 44.69  | 1.42 | 83% |
| 7443   | VRK1      |  |   |   |  |   |  |   | NM_003384    | 30.81  | 1.44 | 83% |
| 51441  | YTHDF2    |  |   |   |  |   |  |   | BC002559     | 127.83 | 1.45 | 83% |
| 4179   | CD46      |  |   |   |  |   |  |   | NM_153826    | 14.03  | 1.46 | 83% |
| 10537  | UBD       |  |   |   |  |   |  |   | BC012472     | 83.47  | 1.46 | 83% |
| 10455  | PECI      |  | Y | Y |  |   |  |   | NM_006117    | 140.19 | 1.49 | 83% |
| 84545  | MRPL43    |  |   |   |  |   |  |   | BC052639     | 66.94  | 1.50 | 83% |
| 11068  | CYB561D2  |  |   |   |  |   |  |   | NM_007022    | 18.83  | 1.51 | 83% |
| 339487 | ZBTB8OS   |  |   |   |  |   |  |   | BC058843     | 60.72  | 1.52 | 83% |
| 5770   | PTPN1     |  |   |   |  |   |  |   | NM_002827    | 47.39  | 1.54 | 83% |
| 3241   | HPCAL1    |  |   |   |  |   |  | Y | NM_002149    | 38.17  | 1.54 | 83% |
| 2130   | EWSR1     |  |   |   |  |   |  |   | BC000527     | 50.78  | 1.56 | 83% |
| 9363   | RAB33A    |  |   |   |  |   |  |   | NM_004794    | 71.61  | 1.56 | 83% |
| 10410  | IFITM3    |  |   |   |  |   |  |   | BC008417     | 51.14  | 1.57 | 83% |
| 54985  | HCFC1R1   |  |   |   |  |   |  | Y | NM_001002018 | 119.81 | 1.57 | 83% |
| 55781  | RIOK2     |  |   |   |  |   |  |   | BC000953     | 75.42  | 1.59 | 83% |
| 55471  | PRO1853   |  |   |   |  |   |  |   | NM_144736    | 47.72  | 1.60 | 83% |
| 56905  | C15orf39  |  |   |   |  |   |  |   | BC011379     | 51.86  | 1.61 | 83% |
| 744    | MPPED2    |  |   |   |  |   |  |   | NM_001584    | 118.83 | 1.61 | 83% |
| 10524  | HTATIP    |  |   |   |  |   |  |   | NM_006388    | 139.00 | 1.63 | 83% |
| 28973  | MRPS18B   |  |   |   |  |   |  |   | NM_014046    | 75.42  | 1.63 | 83% |
| 2299   | FOXI1     |  |   |   |  | Y |  |   | NM_144769    | 80.03  | 1.66 | 83% |
| 133619 | PRRC1     |  |   |   |  |   |  |   | NM_130809    | 248.31 | 1.66 | 83% |
| 2258   | FGF13     |  |   |   |  |   |  | Y | NM_033642    | 194.39 | 1.70 | 83% |
| 1499   | CTNNB1    |  |   |   |  |   |  |   | BC058926     | 38.25  | 1.71 | 83% |
| 114609 | TIRAP     |  |   |   |  |   |  |   | BC032474     | 34.72  | 1.71 | 83% |
| 7347   | UCHL3     |  |   |   |  |   |  |   | NM_006002    | 154.31 | 1.72 | 83% |
| 79882  | ZC3H14    |  |   |   |  |   |  |   | BC027607     | 111.89 | 1.73 | 83% |
| 10428  | CFDP1     |  |   |   |  |   |  |   | NM_006324    | 55.92  | 1.73 | 83% |
| 55198  | APPL2     |  |   |   |  |   |  |   | BC033731     | 35.61  | 1.76 | 83% |
| 64073  | C19orf33  |  |   |   |  |   |  | Y | BC060319     | 53.61  | 1.76 | 83% |
| 8624   | DSCR2     |  |   |   |  |   |  |   | NM_003720    | 63.31  | 1.77 | 83% |

|        |           |  |   |   |  |   |   |           |        |       |     |
|--------|-----------|--|---|---|--|---|---|-----------|--------|-------|-----|
| 51018  | RRP15     |  |   |   |  |   |   | NM_016052 | 58.00  | 1.78  | 83% |
| 55741  | EDEM2     |  |   |   |  |   |   | BC001371  | 47.33  | 1.81  | 83% |
| 5435   | POLR2F    |  |   |   |  |   |   | NM_021974 | 16.81  | 1.82  | 83% |
| 22926  | ATF6      |  |   |   |  |   |   | BC014969  | 134.69 | 1.85  | 83% |
| 50945  | TBX22     |  |   |   |  |   |   | BC014194  | 25.81  | 1.89  | 83% |
| 7867   | MAPKAPK3  |  |   |   |  |   |   | BC001662  | 35.17  | 1.90  | 83% |
| 257144 | GCET2     |  |   |   |  | Y |   | NM_152785 | 92.00  | 1.91  | 83% |
| 81627  | C1orf25   |  |   |   |  |   |   | BC045535  | 178.78 | 1.95  | 83% |
| 11168  | PSIP1     |  |   |   |  |   |   | BC033817  | 26.97  | 1.96  | 83% |
| 55803  | CENTA2    |  |   |   |  |   |   | BC033758  | 297.58 | 1.96  | 83% |
| 10923  | SUB1      |  |   |   |  |   |   | BC010537  | 41.92  | 1.96  | 83% |
| 8894   | EIF2S2    |  |   |   |  |   |   | BC007888  | 149.78 | 1.97  | 83% |
| 5149   | PDE6H     |  |   |   |  |   |   | NM_006205 | 193.81 | 1.98  | 83% |
| 64410  | KLHL25    |  |   |   |  |   |   | NM_022480 | 48.69  | 2.00  | 83% |
| 9445   | ITM2B     |  |   |   |  |   |   | NM_021999 | 25.94  | 2.02  | 83% |
| 64963  | MRPS11    |  |   |   |  |   |   | NM_022839 | 73.00  | 2.02  | 83% |
| 2258   | FGF13     |  |   |   |  | Y |   | NM_033642 | 153.72 | 2.04  | 83% |
| 5106   | PCK2      |  | Y | Y |  |   |   | BC001454  | 81.64  | 2.11  | 83% |
| 6835   | SURF2     |  |   |   |  |   |   | NM_017503 | 192.64 | 2.16  | 83% |
| 54550  | EFCBP2    |  | Y | Y |  |   |   | BC016979  | 152.69 | 2.17  | 83% |
| 51534  | C6orf55   |  |   |   |  | Y |   | NM_016485 | 25.89  | 2.21  | 83% |
| 8674   | VAMP4     |  |   |   |  |   |   | BC005974  | 18.31  | 2.28  | 83% |
| 64221  | ROBO3     |  |   |   |  | Y |   | BC008623  | 115.08 | 2.32  | 83% |
| 56905  | C15orf39  |  |   |   |  |   |   | BC011379  | 167.53 | 2.34  | 83% |
| 2185   | PTK2B     |  |   |   |  | Y |   | NM_004103 | 55.14  | 2.80  | 83% |
| 25807  | RHBDD3    |  |   |   |  |   |   | NM_012265 | 21.39  | 2.85  | 83% |
| 3148   | HMGB2     |  |   |   |  |   |   | NM_002129 | 12.47  | 3.17  | 83% |
| 54840  | APTX      |  |   |   |  |   |   | NM_017692 | 6.89   | 11.55 | 83% |
| 10540  | DCTN2     |  |   |   |  |   |   | BC000718  | 6.11   | 15.33 | 83% |
| 54436  | SH3TC1    |  |   |   |  |   |   | BC068094  | 43.97  | 1.13  | 78% |
| 1495   | CTNNA1    |  |   |   |  |   |   | BC031262  | 38.78  | 1.16  | 78% |
| 9475   | ROCK2     |  |   |   |  |   |   | NM_004850 | 66.58  | 1.20  | 78% |
| 2766   | GMPR      |  |   |   |  | Y |   | NM_006877 | 55.39  | 1.21  | 78% |
| 7867   | MAPKAPK3  |  |   |   |  |   |   | BC001662  | 86.22  | 1.22  | 78% |
| 11190  | CEP250    |  |   |   |  |   |   | BC001433  | 57.58  | 1.23  | 78% |
| 10351  | ABCA8     |  |   | Y |  |   | Y | BC047765  | 52.03  | 1.23  | 78% |
| 4139   | MARK1     |  |   |   |  |   | Y | NM_018650 | 105.44 | 1.24  | 78% |
| 65992  | C20orf116 |  |   |   |  |   |   | BC007957  | 32.75  | 1.25  | 78% |
| 143471 | PSMA8     |  |   |   |  |   | Y | BC042820  | 54.39  | 1.25  | 78% |
| 9470   | EIF4E2    |  |   |   |  |   |   | NM_004846 | 132.36 | 1.25  | 78% |
| 221150 | C13orf3   |  |   |   |  |   | Y | BC048988  | 107.72 | 1.26  | 78% |
| 11282  | MGAT4B    |  |   |   |  | Y |   | BC009464  | 48.89  | 1.26  | 78% |
| 84654  | SPZ1      |  |   |   |  |   |   | NM_032567 | 46.39  | 1.27  | 78% |
| 4950   | OCLN      |  |   |   |  | Y |   | BC029886  | 45.19  | 1.27  | 78% |
| 1238   | CCBP2     |  |   |   |  |   |   | NM_001296 | 53.69  | 1.27  | 78% |
| 93487  | C14orf32  |  |   | Y |  |   |   | NM_144578 | 122.78 | 1.28  | 78% |
| 57708  | MIER1     |  |   |   |  |   |   | BC017423  | 41.81  | 1.28  | 78% |
| 55602  | CDKN2AIP  |  |   |   |  |   |   | BC022270  | 26.31  | 1.29  | 78% |
| 6769   | STAC      |  |   |   |  |   |   | BC020221  | 68.44  | 1.30  | 78% |
| 9121   | SLC16A5   |  |   |   |  |   |   | NM_004695 | 45.42  | 1.31  | 78% |
| 5104   | SERPINA5  |  | Y | Y |  |   |   | NM_000624 | 50.50  | 1.32  | 78% |
| 210    | ALAD      |  | Y | Y |  |   |   | BC000977  | 50.36  | 1.32  | 78% |

|        |          |   |   |   |  |   |   |   |              |        |      |     |
|--------|----------|---|---|---|--|---|---|---|--------------|--------|------|-----|
| 84612  | PARD6B   |   |   |   |  |   |   |   | BC060847     | 49.86  | 1.32 | 78% |
| 7741   | ZNF187   |   |   |   |  |   |   |   | NM_152736    | 131.58 | 1.34 | 78% |
| 3614   | IMPDH1   |   |   |   |  |   |   |   | NM_183243    | 30.47  | 1.34 | 78% |
| 1457   | CSNK2A1  |   |   |   |  |   |   |   | BC011668     | 65.72  | 1.35 | 78% |
| 10205  | MPZL2    |   |   |   |  | Y | Y |   | NM_005797    | 24.83  | 1.35 | 78% |
| 9467   | SH3BP5   |   |   |   |  |   |   |   | NM_004844    | 29.33  | 1.35 | 78% |
| 23483  | TGDS     |   |   |   |  |   |   |   | NM_014305    | 55.11  | 1.37 | 78% |
| 3309   | HSPA5    |   |   |   |  |   |   |   | NM_005347    | 67.11  | 1.37 | 78% |
| 5238   | PGM3     |   |   |   |  |   |   |   | BC001258     | 46.33  | 1.37 | 78% |
| 54677  | CROT     |   |   |   |  |   |   |   | BC051874     | 30.19  | 1.39 | 78% |
| 27071  | DAPP1    |   |   |   |  |   |   | Y | BC012924     | 40.33  | 1.40 | 78% |
| 140462 | ASB9     |   | Y | Y |  |   |   |   | BC001244     | 81.81  | 1.41 | 78% |
| 10325  | RRAGB    |   |   |   |  |   |   |   | BC034726     | 42.64  | 1.42 | 78% |
| 80012  | PHC3     |   |   |   |  |   |   |   | BC022325     | 22.42  | 1.42 | 78% |
| 84128  | WDR75    |   |   |   |  |   |   |   | NM_032168    | 48.94  | 1.43 | 78% |
| 79777  | ACBD4    |   | Y | Y |  |   |   |   | BC041143     | 42.28  | 1.43 | 78% |
| 397    | ARHGDI3  |   |   |   |  |   |   | Y | NM_001175    | 38.86  | 1.44 | 78% |
| 4635   | MYL4     |   |   |   |  | Y | Y |   | NM_002476    | 40.89  | 1.44 | 78% |
| 51316  | PLAC8    |   |   |   |  |   |   |   | NM_016619    | 74.69  | 1.45 | 78% |
| 10476  | ATP5H    |   |   |   |  |   |   |   | NM_006356    | 31.47  | 1.45 | 78% |
| 4869   | NPM1     |   |   |   |  |   |   |   | BC009623     | 72.64  | 1.46 | 78% |
| 54093  | SETD4    |   |   |   |  |   |   |   | NM_001007258 | 48.14  | 1.46 | 78% |
| 79767  | ELMO3    |   |   |   |  |   |   |   | NM_024712    | 42.56  | 1.48 | 78% |
| 6396   | SEC13    |   |   | Y |  |   |   |   | NM_030673    | 45.97  | 1.48 | 78% |
| 58505  | DC2      |   |   |   |  |   |   |   | NM_021227    | 44.36  | 1.48 | 78% |
| 9801   | MRPL19   |   |   | Y |  |   |   |   | NM_014763    | 20.28  | 1.49 | 78% |
| 90338  | ZNF160   |   |   |   |  |   |   |   | BC000807     | 85.22  | 1.49 | 78% |
| 5892   | RAD51L3  |   |   |   |  |   |   |   | BC002723     | 32.39  | 1.50 | 78% |
| 1193   | CLIC2    | Y |   |   |  |   |   |   | BC022305     | 64.97  | 1.50 | 78% |
| 995    | CDC25C   |   |   |   |  |   |   | Y | NM_001790    | 177.06 | 1.51 | 78% |
| 10445  | MCRS1    |   |   |   |  |   |   |   | NM_006337    | 81.69  | 1.52 | 78% |
| 9514   | GAL3ST1  |   |   |   |  |   |   |   | BC014649     | 33.56  | 1.52 | 78% |
| 9275   | BCL7B    |   |   |   |  |   |   |   | NM_001707    | 33.03  | 1.52 | 78% |
| 124402 | FAM100A  |   |   |   |  |   |   |   | NM_145253    | 23.47  | 1.53 | 78% |
| 51375  | SNX7     |   |   |   |  |   |   |   | NM_152238    | 46.28  | 1.53 | 78% |
| 10616  | RBCK1    |   |   |   |  |   |   |   | BC015219     | 36.58  | 1.53 | 78% |
| 1353   | COX11    |   |   | Y |  |   |   |   | BC005895     | 40.58  | 1.53 | 78% |
| 55858  | TMEM165  |   |   |   |  |   |   |   | BC003545     | 45.50  | 1.53 | 78% |
| 1280   | COL2A1   |   |   |   |  |   |   |   | BC007252     | 50.94  | 1.53 | 78% |
| 10746  | MAP3K2   |   |   |   |  |   |   |   | NM_006609    | 86.19  | 1.54 | 78% |
| 344    | APOC2    |   | Y | Y |  |   |   |   | NM_000483    | 28.42  | 1.54 | 78% |
| 55311  | ZNF444   |   |   |   |  |   |   |   | BC021282     | 53.22  | 1.54 | 78% |
| 57348  | TTYH1    |   |   |   |  |   |   |   | BC019358     | 51.14  | 1.54 | 78% |
| 1478   | CSTF2    |   |   |   |  |   |   |   | NM_001325    | 73.11  | 1.55 | 78% |
| 5888   | RAD51    |   |   |   |  |   |   |   | NM_133487    | 59.53  | 1.55 | 78% |
| 7172   | TPMT     |   |   | Y |  |   |   |   | BC005339     | 15.36  | 1.57 | 78% |
| 91419  | XRCC6BP1 |   |   |   |  |   |   |   | BC033881     | 14.14  | 1.57 | 78% |
| 5048   | PAFAH1B1 |   |   |   |  |   |   |   | NM_000430    | 30.61  | 1.57 | 78% |
| 9818   | NUPL1    |   |   |   |  |   |   |   | NM_014089    | 53.06  | 1.57 | 78% |
| 55742  | PARVA    | Y |   |   |  |   |   |   | NM_018222    | 32.86  | 1.57 | 78% |
| 114793 | FMNL2    |   |   |   |  |   |   |   | BC036492     | 56.42  | 1.58 | 78% |
| 55529  | TMEM55A  |   |   |   |  |   |   |   | NM_018710    | 54.42  | 1.58 | 78% |

|        |           |   |   |   |  |   |   |              |        |      |     |
|--------|-----------|---|---|---|--|---|---|--------------|--------|------|-----|
| 83448  | PUS7L     |   |   |   |  |   |   | BC033621     | 213.19 | 1.58 | 78% |
| 9158   | FIBP      |   |   |   |  |   |   | NM_004214    | 79.92  | 1.58 | 78% |
| 10067  | SCAMP3    |   |   |   |  |   |   | NM_005698    | 39.42  | 1.58 | 78% |
| 57678  | GPAM      |   |   |   |  |   |   | BC030783     | 56.42  | 1.59 | 78% |
| 60343  | FAM3A     |   |   |   |  |   |   | BC008912     | 39.06  | 1.59 | 78% |
| 118813 | ZFYVE27   |   |   |   |  |   |   | NM_144588    | 36.19  | 1.60 | 78% |
| 93323  | NY-SAR-48 |   |   |   |  |   |   | BC010176     | 55.83  | 1.60 | 78% |
| 78999  | LRFN4     |   |   |   |  |   |   | BC027475     | 26.56  | 1.60 | 78% |
| 3047   | HBG1      |   |   |   |  |   |   | NM_000559    | 42.47  | 1.61 | 78% |
| 55617  | TASP1     |   |   |   |  |   |   | BC025266     | 130.75 | 1.61 | 78% |
| 51759  | C9orf78   |   |   |   |  |   |   | NM_016520    | 57.14  | 1.61 | 78% |
| 25830  | SULT4A1   |   |   |   |  |   |   | BC022459     | 61.28  | 1.61 | 78% |
| 378    | ARF4      |   |   |   |  |   |   | NM_001660    | 38.97  | 1.61 | 78% |
| 6327   | SCN2B     |   |   |   |  |   |   | NM_004588    | 42.83  | 1.61 | 78% |
| 10982  | MAPRE2    |   |   |   |  |   |   | NM_014268    | 40.75  | 1.62 | 78% |
| 10261  | IGSF6     |   |   |   |  |   |   | BC017844     | 34.17  | 1.62 | 78% |
| 8615   | VDP       |   |   |   |  |   |   | BC032654     | 70.03  | 1.62 | 78% |
| 8187   | ZNF239    |   |   |   |  |   |   | BC026030     | 38.36  | 1.63 | 78% |
| 2272   | FHIT      |   |   |   |  |   |   | NM_002012    | 29.28  | 1.63 | 78% |
| 2257   | FGF12     |   |   |   |  | Y |   | BC022524     | 62.61  | 1.64 | 78% |
| 10136  | ELA3A     |   |   |   |  |   |   | BC007028     | 66.11  | 1.64 | 78% |
| 9221   | NOLC1     |   |   |   |  |   |   | BC006769     | 30.42  | 1.65 | 78% |
| 79012  | CAMKV     |   |   |   |  |   |   | NM_024046    | 62.56  | 1.65 | 78% |
| 9061   | PAPSS1    |   |   |   |  |   |   | BC011392     | 36.42  | 1.68 | 78% |
| 79037  | PVRIG     |   |   |   |  |   |   | BC001129     | 28.94  | 1.69 | 78% |
| 79958  | DENND1C   |   |   |   |  |   |   | BC033437     | 36.17  | 1.70 | 78% |
| 539    | ATP5O     |   |   |   |  |   |   | NM_001697    | 88.08  | 1.71 | 78% |
| 6293   | VPS52     |   |   |   |  |   |   | BC032108     | 116.94 | 1.71 | 78% |
| 9925   | ZBTB5     |   |   |   |  |   |   | NM_014872    | 20.64  | 1.72 | 78% |
| 10100  | TSPAN2    | Y |   |   |  |   |   | NM_005725    | 31.42  | 1.72 | 78% |
| 1269   | CNR2      |   |   |   |  | Y |   | NM_001841    | 24.89  | 1.72 | 78% |
| 9531   | BAG3      |   |   |   |  |   |   | NM_004281    | 56.94  | 1.72 | 78% |
| 283643 | C14orf80  |   |   |   |  | Y |   | NM_173608    | 48.97  | 1.73 | 78% |
| 2246   | FGF1      | Y | Y |   |  |   |   | NM_000800    | 52.50  | 1.73 | 78% |
| 6616   | SNAP25    |   |   |   |  | Y | Y | NM_003081    | 168.39 | 1.74 | 78% |
| 9446   | GSTO1     |   |   |   |  |   |   | NM_004832    | 154.44 | 1.74 | 78% |
| 23034  | SAMD4A    |   |   |   |  | Y |   | BC057838     | 47.06  | 1.74 | 78% |
| 6575   | SLC20A2   |   |   |   |  |   |   | NM_006749    | 32.06  | 1.75 | 78% |
| 2887   | GRB10     |   |   |   |  |   |   | NM_001001550 | 32.72  | 1.75 | 78% |
| 55147  | RBM23     |   |   |   |  |   |   | NM_018107    | 79.78  | 1.75 | 78% |
| 5305   | PIP5K2A   | Y |   |   |  |   |   | NM_005028    | 38.67  | 1.75 | 78% |
| 6812   | STXBP1    |   |   |   |  |   |   | BC015749     | 32.44  | 1.75 | 78% |
| 25953  | PNKD      |   |   |   |  |   |   | NM_015488    | 37.33  | 1.76 | 78% |
| 2571   | GAD1      |   |   |   |  |   |   | BC026349     | 56.00  | 1.76 | 78% |
| 1454   | CSNK1E    |   |   |   |  |   |   | NM_001894    | 53.42  | 1.78 | 78% |
| 57654  | KIAA1530  |   |   |   |  |   |   | BC021930     | 39.14  | 1.78 | 78% |
| 2781   | GNAZ      |   |   |   |  |   |   | BC037333     | 22.86  | 1.79 | 78% |
| 1579   | CYP4A11   |   | Y | Y |  |   |   | BC022851     | 29.86  | 1.79 | 78% |
| 55266  | TMEM19    |   |   | Y |  |   |   | NM_018279    | 37.33  | 1.79 | 78% |
| 23092  | ARHGAP26  |   |   |   |  |   |   | BC068555     | 58.61  | 1.80 | 78% |
| 65008  | MRPL1     |   |   |   |  |   |   | NM_020236    | 211.08 | 1.80 | 78% |
| 10558  | SPTLC1    |   |   |   |  |   |   | NM_178324    | 35.72  | 1.80 | 78% |

|        |              |   |   |   |  |   |   |           |        |      |     |
|--------|--------------|---|---|---|--|---|---|-----------|--------|------|-----|
| 56882  | CDC42SE1     |   |   |   |  |   |   | NM_020239 | 91.42  | 1.81 | 78% |
| 7867   | MAPKAPK3     |   |   |   |  |   |   | BC001662  | 105.75 | 1.81 | 78% |
| 64859  | OBFC2A       |   |   | Y |  |   |   | BC017114  | 28.75  | 1.81 | 78% |
| 10278  | EFS          |   |   |   |  |   | Y | NM_032459 | 59.53  | 1.83 | 78% |
| 255057 | C19orf26     |   |   |   |  |   |   | NM_152769 | 94.06  | 1.83 | 78% |
| 28981  | IFT81        |   |   |   |  |   |   | NM_031473 | 26.11  | 1.84 | 78% |
| 9212   | AURKB        |   |   |   |  |   | Y | BC000442  | 40.36  | 1.84 | 78% |
| 9051   | PSTPIP1      |   |   |   |  |   | Y | NM_003978 | 99.08  | 1.85 | 78% |
| 57568  | SIPA1L2      |   |   |   |  |   |   | BC013119  | 58.69  | 1.85 | 78% |
| 1465   | CSRP1        |   |   |   |  |   |   | NM_004078 | 45.67  | 1.85 | 78% |
| 7004   | TEAD4        |   |   |   |  |   |   | BC015497  | 67.22  | 1.85 | 78% |
| 146705 | C17orf56     |   |   |   |  |   |   | NM_144679 | 173.44 | 1.85 | 78% |
| 83549  | UCK1         |   |   |   |  |   |   | BC015547  | 37.92  | 1.87 | 78% |
| 1026   | CDKN1A       |   |   |   |  |   |   | NM_078467 | 30.94  | 1.89 | 78% |
| 23244  | SCC-112      |   |   |   |  |   |   | BC009650  | 81.97  | 1.89 | 78% |
| 65259  | C16orf28     |   |   |   |  |   |   | NM_023076 | 33.19  | 1.89 | 78% |
| 866    | SERPINA6     |   |   |   |  |   |   | BC056259  | 21.14  | 1.90 | 78% |
| 7047   | TGM4         |   |   |   |  |   | Y | BC007003  | 28.33  | 1.90 | 78% |
| 27042  | C1orf107     |   |   |   |  |   |   | BC022964  | 26.17  | 1.91 | 78% |
| 85403  | EAF1         |   |   |   |  |   |   | NM_033083 | 30.97  | 1.91 | 78% |
| 26523  | EIF2C1       |   |   |   |  |   |   | BC063275  | 48.11  | 1.93 | 78% |
| 10900  | RPIP8        |   |   |   |  |   |   | NM_006695 | 102.06 | 1.93 | 78% |
| 4869   | NPM1         |   |   |   |  |   |   | BC009623  | 113.11 | 1.95 | 78% |
| 55650  | PIGV         |   |   |   |  |   |   | NM_017837 | 22.22  | 1.95 | 78% |
| 8915   | BCL10        |   |   |   |  |   |   | BC053617  | 41.08  | 1.96 | 78% |
| 65258  | MPPE1        |   |   |   |  |   |   | BC002877  | 27.89  | 1.96 | 78% |
| 147798 | TMC4         |   |   |   |  |   |   | BC032477  | 56.94  | 1.97 | 78% |
| 5756   | TWF1         |   |   |   |  |   |   | BC022344  | 88.81  | 1.97 | 78% |
| 2029   | ENSA         |   |   |   |  |   |   | NM_004436 | 40.22  | 1.98 | 78% |
| 229    | ALDOB        | Y | Y | Y |  |   |   | BC029399  | 47.94  | 1.98 | 78% |
| 8519   | IFITM1       | Y |   |   |  |   |   | BC000897  | 49.53  | 1.98 | 78% |
| 65008  | MRPL1        |   |   |   |  |   |   | NM_020236 | 46.19  | 2.00 | 78% |
| 11069  | RAPGEF4      | Y |   |   |  |   |   | BC040183  | 13.69  | 2.02 | 78% |
| 4593   | MUSK         |   |   |   |  |   |   | NM_005592 | 78.89  | 2.02 | 78% |
| 84057  | MND1         |   |   |   |  |   | Y | NM_032117 | 100.72 | 2.03 | 78% |
| 3065   | HDAC1        |   |   |   |  |   |   | NM_004964 | 33.61  | 2.03 | 78% |
| 51343  | FZR1         |   |   | Y |  |   |   | BC013413  | 28.44  | 2.04 | 78% |
| 28991  | COMMD5       |   |   |   |  |   |   | NM_014066 | 51.67  | 2.04 | 78% |
| 22902  | RUFY3        |   |   |   |  |   |   | BC051716  | 156.94 | 2.04 | 78% |
| 7345   | UCHL1        |   |   |   |  |   |   | NM_004181 | 174.67 | 2.06 | 78% |
| 29968  | PSAT1        |   | Y | Y |  |   |   | BC016645  | 357.69 | 2.07 | 78% |
| 533    | ATP6V0B      |   |   |   |  |   |   | BC005876  | 18.89  | 2.07 | 78% |
| 29896  | TRA2A        |   |   |   |  |   |   | NM_013293 | 19.28  | 2.11 | 78% |
| 10075  | HUWE1        |   |   |   |  |   |   | NM_031407 | 13.86  | 2.11 | 78% |
| 256586 | LYSMD2       |   |   |   |  |   |   | BC022075  | 17.06  | 2.12 | 78% |
| 9097   | USP14        |   |   |   |  |   |   | NM_005151 | 16.42  | 2.12 | 78% |
| 1022   | CDK7         |   |   |   |  |   | Y | NM_001799 | 23.39  | 2.13 | 78% |
| 5504   | PPP1R2       |   |   |   |  |   |   | NM_006241 | 40.14  | 2.15 | 78% |
| 51765  | RP6-213H19.1 |   |   |   |  | Y | Y | NM_016542 | 106.89 | 2.16 | 78% |
| 4953   | ODC1         |   |   |   |  |   |   | NM_002539 | 64.94  | 2.18 | 78% |
| 57602  | USP36        |   |   |   |  |   |   | BC038983  | 22.97  | 2.19 | 78% |
| 6748   | SSR4         |   |   |   |  |   |   | NM_006280 | 23.17  | 2.20 | 78% |

|        |           |   |   |   |  |  |   |              |        |      |     |
|--------|-----------|---|---|---|--|--|---|--------------|--------|------|-----|
| 92703  | TMEM183A  |   |   |   |  |  |   | BC013073     | 58.31  | 2.21 | 78% |
| 54478  | FAM64A    |   |   |   |  |  | Y | BC013966     | 390.67 | 2.23 | 78% |
| 5639   | PRRG2     |   |   |   |  |  |   | BC026032     | 19.69  | 2.24 | 78% |
| 8870   | IER3      |   |   |   |  |  |   | NM_003897    | 183.92 | 2.25 | 78% |
| 26063  | DECR2     |   | Y | Y |  |  |   | NM_020664    | 90.36  | 2.27 | 78% |
| 493856 | ZCD2      |   |   |   |  |  |   | NM_001008388 | 29.97  | 2.28 | 78% |
| 126282 | TNFAIP8L1 | Y |   | Y |  |  |   | NM_152362    | 48.19  | 2.30 | 78% |
| 5478   | PPIA      |   |   |   |  |  |   | BC005982     | 57.50  | 2.32 | 78% |
| 2077   | ERF       |   |   |   |  |  |   | BC022231     | 19.67  | 2.32 | 78% |
| 4800   | NFYA      |   |   |   |  |  |   | BC039244     | 31.83  | 2.32 | 78% |
| 84305  | WIBG      |   |   |   |  |  |   | NM_032345    | 229.72 | 2.32 | 78% |
| 4688   | NCF2      |   |   |   |  |  | Y | BC001606     | 258.92 | 2.32 | 78% |
| 9457   | FHL5      |   |   |   |  |  |   | BC021723     | 27.69  | 2.39 | 78% |
| 6093   | ROCK1     | Y |   |   |  |  |   | NM_005406    | 58.22  | 2.39 | 78% |
| 30968  | STOML2    |   |   |   |  |  |   | BC010152     | 108.61 | 2.40 | 78% |
| 10783  | NEK6      |   |   | Y |  |  |   | BC012761     | 38.75  | 2.40 | 78% |
| 6778   | STAT6     |   |   |   |  |  |   | BC005823     | 29.47  | 2.40 | 78% |
| 5590   | PRKCZ     |   |   | Y |  |  |   | NM_002744    | 123.00 | 2.41 | 78% |
| 339122 | RAB43     |   |   |   |  |  |   | NM_198490    | 19.81  | 2.41 | 78% |
| 85300  | ATCAY     |   |   |   |  |  |   | NM_033064    | 226.03 | 2.44 | 78% |
| 284    | ANGPT1    |   |   |   |  |  |   | BC029406     | 32.33  | 2.45 | 78% |
| 131616 | TMEM42    |   |   |   |  |  |   | NM_144638    | 14.08  | 2.46 | 78% |
| 55841  | WWC3      | Y |   |   |  |  |   | BC035601     | 59.00  | 2.47 | 78% |
| 10458  | BAIAP2    | Y |   | Y |  |  |   | BC014020     | 159.25 | 2.61 | 78% |
| 9139   | CBFA2T2   |   |   |   |  |  |   | BC015066     | 75.14  | 2.61 | 78% |
| 11326  | VSIG4     |   |   |   |  |  | Y | NM_007268    | 10.42  | 2.67 | 78% |
| 5613   | PRKX      |   |   |   |  |  |   | NM_005044    | 101.64 | 2.70 | 78% |
| 55783  | FLJ11171  |   |   |   |  |  |   | BC034468     | 11.25  | 2.77 | 78% |
| 83939  | EIF2A     |   |   |   |  |  |   | BC011885     | 114.25 | 2.78 | 78% |
| 1382   | CRABP2    |   |   |   |  |  | Y | NM_001878    | 234.72 | 2.78 | 78% |
| 57561  | ARRDC3    |   |   | Y |  |  |   | NM_020801    | 18.72  | 2.82 | 78% |
| 5121   | PCP4      |   |   |   |  |  | Y | BC013791     | 63.22  | 2.83 | 78% |
| 10726  | NUDC      |   |   |   |  |  |   | BC003132     | 98.42  | 2.91 | 78% |
| 10959  | TMED2     |   |   |   |  |  |   | NM_006815    | 14.53  | 2.94 | 78% |
| 10302  | SNAPC5    |   |   |   |  |  |   | BC014315     | 11.75  | 2.96 | 78% |
| 56891  | LGALS14   |   |   |   |  |  | Y | BC022257     | 40.58  | 2.98 | 78% |
| 64718  | UNKL      |   |   |   |  |  |   | BC011924     | 47.25  | 3.04 | 78% |
| 50619  | DEF6      |   |   |   |  |  | Y | BC017504     | 8.78   | 3.07 | 78% |
| 5563   | PRKAA2    |   |   |   |  |  |   | NM_006252    | 28.00  | 3.08 | 78% |
| 201134 | CCDC46    |   |   |   |  |  |   | BC029524     | 77.58  | 3.15 | 78% |
| 51105  | PHF20L1   |   |   |   |  |  |   | BC056413     | 11.33  | 3.17 | 78% |
| 1760   | DMPK      |   |   |   |  |  |   | NM_004409    | 268.17 | 3.38 | 78% |
| 54959  | ODAM      |   |   | Y |  |  |   | NM_017855    | 21.61  | 3.47 | 78% |
| 5932   | RBBP8     |   |   |   |  |  |   | BC030590     | 27.97  | 3.63 | 78% |
| 3980   | LIG3      |   |   |   |  |  |   | NM_013975    | 133.97 | 3.63 | 78% |
| 23318  | ZCCHC11   |   |   |   |  |  |   | BC048301     | 57.64  | 3.87 | 78% |
| 6118   | RPA2      |   |   |   |  |  |   | NM_002946    | 24.94  | 4.23 | 78% |
| 5593   | PRKG2     |   |   |   |  |  |   | NM_006259    | 66.86  | 4.26 | 78% |
| 84078  | KBTBD7    |   |   |   |  |  |   | NM_032138    | 19.33  | 4.84 | 78% |
| 51651  | PTRH2     |   |   |   |  |  |   | NM_016077    | 11.53  | 5.32 | 78% |
| 79734  | KCTD17    |   |   |   |  |  | Y | BC009961     | 32.39  | 5.84 | 78% |
| 50619  | DEF6      |   |   |   |  |  | Y | BC017504     | 11.00  | 6.02 | 78% |

|        |           |   |  |  |   |   |   |   |           |         |        |     |
|--------|-----------|---|--|--|---|---|---|---|-----------|---------|--------|-----|
| 8934   | RAB7L1    |   |  |  |   |   |   |   | NM_003929 | 10.58   | 6.83   | 78% |
| 57162  | PEL1      |   |  |  |   |   |   |   | NM_020651 | 7.83    | 7.33   | 78% |
| 4706   | NDUFAB1   |   |  |  |   |   |   |   | BC058920  | 8.47    | 8.04   | 78% |
| 5693   | PSMB5     |   |  |  |   |   |   |   | BC057840  | 6.25    | 9.80   | 78% |
| 144097 | LOC144097 |   |  |  |   |   |   |   | BC056402  | 20.17   | 11.41  | 78% |
| 84720  | PIGO      |   |  |  |   |   |   |   | NM_152850 | 7.56    | 17.89  | 78% |
| 3959   | LGALS3BP  |   |  |  |   |   |   |   | NM_005567 | 3.72    | 23.27  | 78% |
| 5579   | PRKCB1    |   |  |  |   |   | Y |   | NM_002738 | 2.47    | 34.20  | 78% |
| 51308  | REEP2     |   |  |  |   |   |   |   | NM_016606 | 1.44    | 88.69  | 78% |
| 51374  | C2orf28   |   |  |  |   |   |   |   | BC011006  | -2.72   | -36.41 | 72% |
| 79712  | GTDC1     |   |  |  |   |   |   | Y | BC061699  | -3.75   | -28.64 | 72% |
| 121053 | C12orf45  |   |  |  |   |   |   |   | NM_152318 | -9.50   | -20.36 | 72% |
| 64327  | LMBR1     |   |  |  |   |   |   |   | NM_022458 | -25.92  | -20.26 | 72% |
| 515    | ATP5F1    |   |  |  |   |   |   |   | NM_001688 | -7.19   | -12.44 | 72% |
| 23580  | CDC42EP4  |   |  |  |   |   |   |   | BC010451  | -180.78 | -4.93  | 72% |
| 881    | CCIN      |   |  |  |   |   |   |   | NM_005893 | 43.69   | 1.19   | 72% |
| 974    | CD79B     |   |  |  |   |   |   | Y | BC030210  | 49.14   | 1.22   | 72% |
| 8448   | DOC2A     |   |  |  |   |   |   |   | BC041769  | 28.83   | 1.23   | 72% |
| 80210  | ARMC9     |   |  |  |   |   |   |   | BC004514  | 228.72  | 1.24   | 72% |
| 9529   | BAG5      |   |  |  |   |   |   |   | NM_004873 | 71.39   | 1.25   | 72% |
| 4241   | MFI2      |   |  |  | Y | Y | Y |   | NM_033316 | 69.78   | 1.26   | 72% |
| 23588  | KLHDC2    |   |  |  |   |   |   |   | NM_014315 | 34.25   | 1.26   | 72% |
| 9111   | NMI       |   |  |  |   |   |   |   | BC021987  | 34.75   | 1.27   | 72% |
| 90121  | TSR2      |   |  |  |   |   |   |   | NM_058163 | 168.14  | 1.29   | 72% |
| 6901   | TAZ       |   |  |  |   |   |   |   | BC011515  | 51.69   | 1.30   | 72% |
| 55510  | DDX43     |   |  |  |   |   |   |   | BC066938  | 141.36  | 1.30   | 72% |
| 1211   | CLTA      |   |  |  |   |   |   |   | NM_001833 | 53.00   | 1.31   | 72% |
| 84901  | NFATC2IP  |   |  |  |   |   |   |   | BC021551  | 64.22   | 1.31   | 72% |
| 5791   | PTPRE     |   |  |  |   |   |   | Y | NM_006504 | 19.19   | 1.34   | 72% |
| 84969  | C20orf100 | Y |  |  |   |   |   |   | NM_032883 | 17.92   | 1.34   | 72% |
| 147685 | C19orf18  |   |  |  |   |   |   |   | NM_152474 | 61.28   | 1.34   | 72% |
| 3664   | IRF6      |   |  |  |   |   |   | Y | NM_006147 | 48.00   | 1.34   | 72% |
| 9982   | FGFBP1    |   |  |  |   |   | Y |   | NM_005130 | 32.39   | 1.34   | 72% |
| 9570   | GOSR2     |   |  |  |   |   |   |   | BC009710  | 34.83   | 1.35   | 72% |
| 160140 | C11orf65  |   |  |  |   |   |   |   | NM_152587 | 23.83   | 1.36   | 72% |
| 11344  | TWF2      |   |  |  |   |   |   |   | NM_007284 | 122.14  | 1.37   | 72% |
| 5747   | PTK2      |   |  |  |   |   |   |   | NM_153831 | 98.47   | 1.37   | 72% |
| 56957  | OTUD7B    |   |  |  |   |   |   |   | BC020622  | 84.47   | 1.37   | 72% |
| 79643  | CHMP6     |   |  |  |   |   |   |   | NM_024591 | 20.06   | 1.38   | 72% |
| 23209  | MLC1      |   |  |  |   |   |   |   | BC028425  | 41.69   | 1.38   | 72% |
| 673    | BRAF      |   |  |  |   |   |   |   | NM_004333 | 60.42   | 1.38   | 72% |
| 25906  | C11orf51  |   |  |  |   |   |   |   | NM_014042 | 79.50   | 1.39   | 72% |
| 10728  | PTGES3    |   |  |  |   |   |   |   | NM_006601 | 25.25   | 1.39   | 72% |
| 5684   | PSMA3     |   |  |  |   |   |   |   | NM_002788 | 32.72   | 1.39   | 72% |
| 2331   | FMOD      |   |  |  |   |   |   | Y | BC035281  | 32.08   | 1.40   | 72% |
| 241    | ALOX5AP   |   |  |  |   |   |   | Y | NM_001629 | 48.75   | 1.40   | 72% |
| 40     | ACCN1     |   |  |  |   |   |   |   | NM_001094 | 60.47   | 1.41   | 72% |
| 79568  | C2orf47   |   |  |  |   |   |   |   | BC017959  | 54.44   | 1.42   | 72% |
| 5601   | MAPK9     |   |  |  |   |   |   |   | BC032539  | 104.94  | 1.43   | 72% |
| 7337   | UBE3A     |   |  |  |   |   |   |   | BC002582  | 106.14  | 1.43   | 72% |
| 57045  | TWSG1     |   |  |  |   |   | Y |   | NM_020648 | 60.56   | 1.43   | 72% |
| 4175   | MCM6      |   |  |  |   |   |   |   | NM_005915 | 115.31  | 1.44   | 72% |



|        |          |  |   |   |  |   |  |              |        |      |     |
|--------|----------|--|---|---|--|---|--|--------------|--------|------|-----|
| 1788   | DNMT3A   |  |   |   |  |   |  | NM_175630    | 69.97  | 1.45 | 72% |
| 83862  | TMPIT    |  |   | Y |  |   |  | BC051850     | 48.22  | 1.45 | 72% |
| 84522  | JAGN1    |  |   |   |  |   |  | BC032101     | 84.19  | 1.45 | 72% |
| 54457  | TAF7L    |  |   |   |  |   |  | BC043391     | 37.72  | 1.45 | 72% |
| 83892  | KCTD10   |  |   |   |  |   |  | NM_031954    | 27.97  | 1.45 | 72% |
| 5786   | PTPRA    |  |   |   |  |   |  | NM_080840    | 43.33  | 1.45 | 72% |
| 57573  | ZNF471   |  |   |   |  |   |  | BC028227     | 38.17  | 1.45 | 72% |
| 3613   | IMPA2    |  | Y | Y |  |   |  | NM_014214    | 57.19  | 1.46 | 72% |
| 1956   | EGFR     |  |   |   |  |   |  | NP_005219    | 195.72 | 1.47 | 72% |
| 5865   | RAB3B    |  |   |   |  |   |  | NM_002867    | 79.33  | 1.47 | 72% |
| 5562   | PRKAA1   |  |   |   |  |   |  | NM_006251    | 132.69 | 1.47 | 72% |
| 55754  | TMEM30A  |  |   |   |  |   |  | BC009006     | 90.75  | 1.48 | 72% |
| 90529  | C1orf201 |  |   |   |  |   |  | NM_178122    | 35.06  | 1.48 | 72% |
| 9489   | PGS1     |  |   |   |  |   |  | NM_024419    | 30.56  | 1.48 | 72% |
| 7918   | BAT4     |  |   |   |  |   |  | NM_033177    | 28.42  | 1.48 | 72% |
| 11183  | MAP4K5   |  |   |   |  |   |  | NM_006575    | 103.72 | 1.48 | 72% |
| 10461  | MERTK    |  |   |   |  |   |  | NM_006343    | 49.33  | 1.48 | 72% |
| 84632  | AFAP1L2  |  |   |   |  | Y |  | NM_001001936 | 88.97  | 1.49 | 72% |
| 327    | APEH     |  |   |   |  |   |  | NM_001640    | 72.97  | 1.49 | 72% |
| 10307  | APBB3    |  |   |   |  |   |  | BC013158     | 34.67  | 1.50 | 72% |
| 8498   | RANBP3   |  |   |   |  |   |  | BC004349     | 32.39  | 1.50 | 72% |
| 80011  | NIP30    |  |   |   |  |   |  | NM_024946    | 50.94  | 1.51 | 72% |
| 23338  | PHF15    |  |   |   |  |   |  | BC004292     | 174.28 | 1.51 | 72% |
| 79754  | ASB13    |  |   |   |  |   |  | BC012056     | 22.22  | 1.51 | 72% |
| 55304  | SPTLC3   |  | Y | Y |  |   |  | NM_018327    | 37.67  | 1.52 | 72% |
| 115825 | WDFY2    |  |   |   |  |   |  | NM_052950    | 33.72  | 1.53 | 72% |
| 7416   | VDAC1    |  |   | Y |  |   |  | NM_003374    | 23.78  | 1.53 | 72% |
| 3788   | KCNS2    |  |   |   |  |   |  | NM_020697    | 35.36  | 1.53 | 72% |
| 51642  | MRPL48   |  |   |   |  |   |  | BC009764     | 30.36  | 1.54 | 72% |
| 6856   | SYPL1    |  |   |   |  |   |  | NM_006754    | 60.67  | 1.54 | 72% |
| 10193  | RNF41    |  | Y | Y |  |   |  | NM_005785    | 30.47  | 1.54 | 72% |
| 199964 | TMEM61   |  |   |   |  | Y |  | BC029775     | 49.47  | 1.54 | 72% |
| 84632  | AFAP1L2  |  |   |   |  | Y |  | NM_001001936 | 261.39 | 1.55 | 72% |
| 9619   | ABCG1    |  |   |   |  | Y |  | BC029158     | 30.92  | 1.55 | 72% |
| 112817 | C10orf65 |  | Y | Y |  |   |  | NM_138413    | 60.56  | 1.55 | 72% |
| 4154   | MBNL1    |  |   |   |  |   |  | NM_021038    | 42.33  | 1.55 | 72% |
| 8802   | SUCLG1   |  | Y | Y |  |   |  | BC000504     | 19.28  | 1.56 | 72% |
| 10209  | EIF1     |  |   |   |  |   |  | NM_005801    | 66.31  | 1.56 | 72% |
| 23197  | UBXD8    |  |   |   |  |   |  | BC014001     | 51.22  | 1.56 | 72% |
| 22931  | RAB18    |  |   |   |  |   |  | NM_021252    | 64.33  | 1.56 | 72% |
| 23089  | PEG10    |  |   |   |  | Y |  | NM_015068    | 52.78  | 1.56 | 72% |
| 9344   | TAOK2    |  |   |   |  |   |  | NM_004783    | 76.11  | 1.56 | 72% |
| 55339  | WDR33    |  |   |   |  | Y |  | BC013990     | 35.47  | 1.56 | 72% |
| 440556 | FLJ42875 |  |   |   |  | Y |  | BC029785     | 30.78  | 1.57 | 72% |
| 91574  | FLJ38663 |  |   |   |  |   |  | BC020885     | 42.36  | 1.57 | 72% |
| 57728  | WDR19    |  |   |   |  |   |  | BC032578     | 32.83  | 1.57 | 72% |
| 10607  | TBL3     |  |   |   |  |   |  | NM_006453    | 49.14  | 1.57 | 72% |
| 3590   | IL11RA   |  |   |   |  |   |  | NM_004512    | 62.44  | 1.57 | 72% |
| 7164   | TPD52L1  |  |   |   |  | Y |  | NM_001003396 | 71.92  | 1.57 | 72% |
| 55239  | OGFOD1   |  |   |   |  |   |  | BC032919     | 21.86  | 1.58 | 72% |
| 9776   | KIAA0652 |  |   |   |  |   |  | BC006191     | 34.42  | 1.58 | 72% |
| 255119 | C4orf22  |  |   |   |  |   |  | NM_152770    | 86.67  | 1.58 | 72% |

|        |           |   |  |  |   |  |  |   |           |        |      |     |
|--------|-----------|---|--|--|---|--|--|---|-----------|--------|------|-----|
| 6734   | SRPR      |   |  |  |   |  |  |   | BC008077  | 55.56  | 1.59 | 72% |
| 5440   | POLR2K    |   |  |  |   |  |  |   | NM_005034 | 31.06  | 1.59 | 72% |
| 83450  | LRRC48    |   |  |  |   |  |  |   | BC050419  | 43.17  | 1.59 | 72% |
| 6789   | STK4      |   |  |  |   |  |  | Y | NM_006282 | 78.56  | 1.59 | 72% |
| 55324  | ABCF3     |   |  |  |   |  |  |   | BC009253  | 90.33  | 1.59 | 72% |
| 94101  | ORMDL1    |   |  |  |   |  |  |   | NM_016467 | 83.89  | 1.60 | 72% |
| 834    | CASP1     |   |  |  |   |  |  | Y | NM_033293 | 34.11  | 1.60 | 72% |
| 8443   | GNPAT     |   |  |  |   |  |  |   | BC000450  | 24.58  | 1.60 | 72% |
| 9802   | DAZAP2    |   |  |  |   |  |  |   | NM_014764 | 43.36  | 1.61 | 72% |
| 375484 | C5orf25   |   |  |  |   |  |  |   | NM_198567 | 40.06  | 1.61 | 72% |
| 284680 | C1orf111  |   |  |  |   |  |  |   | BC032957  | 30.08  | 1.61 | 72% |
| 27258  | LSM3      |   |  |  |   |  |  |   | NM_014463 | 42.50  | 1.61 | 72% |
| 50717  | WDR42A    |   |  |  | Y |  |  |   | BC013107  | 39.81  | 1.62 | 72% |
| 5110   | PCMT1     |   |  |  |   |  |  |   | BC008748  | 22.94  | 1.62 | 72% |
| 140767 | NRSN1     |   |  |  |   |  |  |   | BC023514  | 52.31  | 1.63 | 72% |
| 55191  | NADSYN1   |   |  |  |   |  |  |   | BC003666  | 72.61  | 1.63 | 72% |
| 2739   | GLO1      |   |  |  |   |  |  |   | BC001741  | 50.31  | 1.63 | 72% |
| 10948  | STARD3    |   |  |  |   |  |  |   | NM_006804 | 52.22  | 1.63 | 72% |
| 92714  | ARRDC1    |   |  |  |   |  |  | Y | NM_152285 | 19.47  | 1.64 | 72% |
| 6253   | RTN2      |   |  |  |   |  |  |   | BC014244  | 79.86  | 1.64 | 72% |
| 23583  | SMUG1     |   |  |  |   |  |  |   | BC000417  | 47.08  | 1.64 | 72% |
| 7390   | UROS      |   |  |  |   |  |  |   | NM_000375 | 63.19  | 1.64 | 72% |
| 823    | CAPN1     |   |  |  |   |  |  |   | BC015091  | 30.58  | 1.64 | 72% |
| 56648  | EIF5A2    |   |  |  |   |  |  |   | NM_020390 | 13.78  | 1.64 | 72% |
| 6398   | SECTM1    |   |  |  |   |  |  |   | NM_003004 | 43.94  | 1.64 | 72% |
| 23543  | RBM9      |   |  |  |   |  |  |   | BC013115  | 49.28  | 1.64 | 72% |
| 7551   | ZNF3      |   |  |  |   |  |  |   | BC008031  | 21.42  | 1.64 | 72% |
| 8418   | CMAH      | Y |  |  |   |  |  |   | BC022302  | 48.56  | 1.65 | 72% |
| 65264  | UBE2Z     |   |  |  |   |  |  |   | NM_023079 | 39.69  | 1.65 | 72% |
| 51003  | MED31     |   |  |  |   |  |  |   | BC012539  | 38.39  | 1.65 | 72% |
| 9636   | ISG15     | Y |  |  |   |  |  |   | BC009507  | 18.28  | 1.65 | 72% |
| 23545  | ATP6V0A2  |   |  |  |   |  |  |   | BC022300  | 24.72  | 1.65 | 72% |
| 84936  | ZFYVE19   |   |  |  |   |  |  |   | BC015738  | 60.14  | 1.66 | 72% |
| 56270  | WDR45L    |   |  |  |   |  |  |   | NM_019613 | 18.22  | 1.66 | 72% |
| 6717   | SRI       |   |  |  |   |  |  |   | NM_003130 | 36.83  | 1.66 | 72% |
| 10010  | TANK      |   |  |  |   |  |  |   | NM_133484 | 110.22 | 1.67 | 72% |
| 80317  | ZNF306    |   |  |  |   |  |  |   | NM_024493 | 70.86  | 1.67 | 72% |
| 55207  | ARL8B     |   |  |  |   |  |  |   | NM_018184 | 57.89  | 1.68 | 72% |
| 63874  | ABHD4     |   |  |  |   |  |  |   | NM_022060 | 40.69  | 1.68 | 72% |
| 10069  | C21orf6   |   |  |  |   |  |  |   | NM_016940 | 62.56  | 1.68 | 72% |
| 51647  | FAM96B    |   |  |  |   |  |  |   | NM_016062 | 186.31 | 1.68 | 72% |
| 93627  | MGC16169  |   |  |  |   |  |  |   | NM_033115 | 30.47  | 1.69 | 72% |
| 4209   | MEF2D     |   |  |  |   |  |  |   | BC054520  | 187.00 | 1.69 | 72% |
| 144233 | LOC144233 |   |  |  |   |  |  |   | BC053560  | 179.47 | 1.69 | 72% |
| 127733 | UBXD3     |   |  |  |   |  |  |   | NM_152376 | 100.92 | 1.69 | 72% |
| 154881 | KCTD7     |   |  |  |   |  |  |   | BC042482  | 88.75  | 1.69 | 72% |
| 3306   | HSPA2     |   |  |  | Y |  |  |   | BC036107  | 65.72  | 1.69 | 72% |
| 51231  | VRK3      |   |  |  |   |  |  |   | NM_016440 | 111.53 | 1.70 | 72% |
| 253725 | FAM21C    |   |  |  |   |  |  |   | BC006456  | 94.42  | 1.70 | 72% |
| 2873   | GPS1      |   |  |  | Y |  |  |   | NM_212492 | 24.83  | 1.70 | 72% |
| 2958   | GTF2A2    |   |  |  |   |  |  |   | NM_004492 | 43.72  | 1.70 | 72% |
| 7001   | PRDX2     |   |  |  |   |  |  |   | NM_181738 | 91.11  | 1.70 | 72% |

|        |           |   |   |   |  |   |   |           |        |      |     |
|--------|-----------|---|---|---|--|---|---|-----------|--------|------|-----|
| 29903  | CCDC106   |   |   |   |  |   |   | BC000412  | 30.25  | 1.70 | 72% |
| 143098 | MPP7      |   |   |   |  |   |   | BC038105  | 73.64  | 1.71 | 72% |
| 22934  | RPIA      |   |   |   |  |   |   | NM_144563 | 75.69  | 1.71 | 72% |
| 51324  | SPG21     |   |   |   |  |   |   | NM_016630 | 32.19  | 1.71 | 72% |
| 23062  | GGA2      |   |   |   |  |   |   | BC000284  | 25.58  | 1.71 | 72% |
| 11315  | PARK7     |   |   |   |  |   |   | NM_007262 | 62.83  | 1.71 | 72% |
| 27285  | TEKT2     |   |   |   |  |   |   | NM_014466 | 52.92  | 1.72 | 72% |
| 5704   | PSMC4     |   |   | Y |  |   |   | NM_153001 | 37.75  | 1.72 | 72% |
| 79077  | XTP3TPA   |   |   |   |  |   |   | NM_024096 | 117.42 | 1.72 | 72% |
| 55094  | GPATCH1   |   |   |   |  |   |   | NM_018025 | 112.28 | 1.73 | 72% |
| 782    | CACNB1    |   |   |   |  | Y |   | NM_000723 | 45.11  | 1.73 | 72% |
| 9060   | PAPSS2    |   |   |   |  |   |   | BC009894  | 67.64  | 1.73 | 72% |
| 79092  | CARD14    |   |   |   |  |   |   | BC018142  | 43.97  | 1.74 | 72% |
| 83988  | NCALD     |   |   | Y |  |   |   | BC009949  | 44.64  | 1.74 | 72% |
| 112849 | C14orf149 |   | Y | Y |  |   |   | BC012131  | 29.92  | 1.74 | 72% |
| 4602   | MYB       |   |   | Y |  |   |   | NM_005375 | 26.11  | 1.74 | 72% |
| 50999  | TMED5     |   |   |   |  |   |   | BC016365  | 32.83  | 1.74 | 72% |
| 2582   | GALE      |   | Y | Y |  |   |   | NM_000403 | 23.89  | 1.75 | 72% |
| 7627   | ZNF75A    |   |   |   |  |   |   | BC051366  | 74.36  | 1.75 | 72% |
| 29777  | ABT1      |   |   |   |  |   |   | NM_013375 | 224.00 | 1.75 | 72% |
| 10081  | PDCD7     |   |   |   |  |   |   | BC016992  | 36.56  | 1.75 | 72% |
| 142940 | TRUB1     |   |   |   |  |   |   | NM_139169 | 107.25 | 1.76 | 72% |
| 271    | AMPD2     |   |   |   |  |   |   | NM_139156 | 48.31  | 1.76 | 72% |
| 808    | CALM3     |   |   |   |  |   | Y | BC006182  | 12.78  | 1.76 | 72% |
| 84916  | CIRH1A    |   | Y | Y |  |   |   | BC009348  | 233.28 | 1.76 | 72% |
| 25855  | BRMS1     |   |   |   |  |   |   | NM_015399 | 31.33  | 1.77 | 72% |
| 58529  | MYOZ1     | Y |   |   |  |   |   | NM_021245 | 27.06  | 1.77 | 72% |
| 725    | C4BPB     |   |   |   |  |   | Y | BC005378  | 38.08  | 1.77 | 72% |
| 55351  | STK32B    |   | Y |   |  |   |   | NM_018401 | 57.75  | 1.77 | 72% |
| 80227  | WDR71     |   |   |   |  |   |   | BC006142  | 27.92  | 1.78 | 72% |
| 10095  | ARPC1B    |   |   |   |  | Y | Y | NM_005720 | 50.00  | 1.78 | 72% |
| 55272  | IMP3      |   |   |   |  |   |   | NM_018285 | 17.25  | 1.78 | 72% |
| 10253  | SPRY2     |   |   |   |  |   |   | NM_005842 | 27.14  | 1.78 | 72% |
| 51495  | PTPLAD1   |   |   |   |  |   |   | BC058912  | 60.97  | 1.78 | 72% |
| 10673  | TNFSF13B  |   |   |   |  |   | Y | NM_006573 | 38.72  | 1.79 | 72% |
| 79017  | C7orf24   |   |   |   |  |   |   | NM_024051 | 32.50  | 1.79 | 72% |
| 79657  | FLJ21908  |   |   |   |  |   |   | BC056415  | 57.19  | 1.79 | 72% |
| 11218  | DDX20     |   |   |   |  |   |   | BC011556  | 56.67  | 1.80 | 72% |
| 1021   | CDK6      | Y |   |   |  |   |   | NM_001259 | 52.53  | 1.80 | 72% |
| 54962  | TIPIN     |   |   |   |  |   |   | BC000870  | 41.61  | 1.80 | 72% |
| 11060  | WWP2      |   |   |   |  |   | Y | BC000108  | 43.06  | 1.80 | 72% |
| 84675  | TRIM55    |   |   |   |  |   |   | BC007750  | 39.67  | 1.81 | 72% |
| 26750  | RPS6KC1   |   |   |   |  |   |   | NM_012424 | 61.08  | 1.81 | 72% |
| 83887  | TTLL2     |   |   |   |  |   |   | BC047411  | 73.64  | 1.81 | 72% |
| 79155  | TNIP2     |   |   |   |  |   |   | NM_024309 | 146.67 | 1.82 | 72% |
| 275    | AMT       |   |   |   |  |   |   | BC007546  | 69.56  | 1.82 | 72% |
| 51021  | MRPS16    |   |   |   |  |   |   | NM_016065 | 65.28  | 1.82 | 72% |
| 4957   | ODF2      |   |   |   |  |   |   | NM_002540 | 54.33  | 1.82 | 72% |
| 6398   | SECTM1    |   |   |   |  |   |   | NM_003004 | 36.44  | 1.82 | 72% |
| 25804  | LSM4      |   |   |   |  |   |   | NM_012321 | 20.78  | 1.83 | 72% |
| 3669   | ISG20     |   |   |   |  |   | Y | NM_002201 | 107.22 | 1.83 | 72% |
| 81532  | HCCA2     |   |   |   |  |   |   | NM_053005 | 68.19  | 1.83 | 72% |

|        |           |   |   |   |  |   |   |           |        |      |     |
|--------|-----------|---|---|---|--|---|---|-----------|--------|------|-----|
| 51528  | C14orf100 |   |   |   |  |   |   | NM_016475 | 41.19  | 1.83 | 72% |
| 10783  | NEK6      |   |   | Y |  |   |   | BC012761  | 33.64  | 1.84 | 72% |
| 5829   | PXN       |   |   |   |  |   |   | BC052611  | 46.92  | 1.84 | 72% |
| 57862  | ZNF410    |   |   |   |  |   |   | BC050683  | 27.14  | 1.84 | 72% |
| 10232  | MSLN      |   |   |   |  | Y |   | BC003512  | 31.17  | 1.84 | 72% |
| 158427 | C9orf97   |   |   |   |  |   |   | BC022958  | 30.06  | 1.84 | 72% |
| 55319  | FLJ11184  |   |   |   |  |   |   | BC011842  | 92.22  | 1.85 | 72% |
| 7375   | USP4      |   |   |   |  |   |   | NM_003363 | 24.33  | 1.85 | 72% |
| 26043  | UBXD7     |   |   |   |  |   |   | BC047420  | 25.36  | 1.85 | 72% |
| 1390   | CREM      |   |   |   |  | Y |   | BC017117  | 30.28  | 1.85 | 72% |
| 2039   | EPB49     |   |   |   |  |   |   | BC006318  | 35.64  | 1.86 | 72% |
| 219402 | MTIF3     |   |   |   |  |   |   | NM_152912 | 33.81  | 1.86 | 72% |
| 10455  | PECI      |   | Y | Y |  |   |   | NM_006117 | 29.61  | 1.87 | 72% |
| 10267  | RAMP1     |   |   |   |  |   |   | NM_005855 | 79.67  | 1.87 | 72% |
| 1153   | CIRBP     |   |   |   |  |   |   | NM_001280 | 97.42  | 1.87 | 72% |
| 652968 | LOC652968 |   |   |   |  |   |   | BC021927  | 30.28  | 1.87 | 72% |
| 28981  | IFT81     |   |   |   |  |   |   | NM_031473 | 94.61  | 1.87 | 72% |
| 5375   | PMP2      |   |   |   |  |   |   | NM_002677 | 38.39  | 1.87 | 72% |
| 1727   | CYB5R3    |   |   |   |  |   |   | NM_000398 | 28.78  | 1.87 | 72% |
| 3094   | HINT1     |   |   |   |  |   |   | NM_005340 | 45.28  | 1.87 | 72% |
| 9764   | KIAA0513  |   |   |   |  |   |   | BC030280  | 36.83  | 1.87 | 72% |
| 730092 | LOC730092 | Y |   |   |  |   | Y | NM_145237 | 50.14  | 1.88 | 72% |
| 5594   | MAPK1     |   |   |   |  |   |   | NM_002745 | 34.75  | 1.89 | 72% |
| 462    | SERPINC1  |   |   |   |  |   |   | BC022309  | 24.72  | 1.89 | 72% |
| 84817  | TXNL5     |   |   |   |  |   |   | NM_032731 | 94.94  | 1.89 | 72% |
| 81573  | ANKRD13C  | Y |   | Y |  |   |   | BC028840  | 39.31  | 1.90 | 72% |
| 7866   | IFRD2     |   |   |   |  |   |   | BC001327  | 54.25  | 1.90 | 72% |
| 3614   | IMPDH1    |   |   |   |  |   |   | NM_183243 | 75.83  | 1.90 | 72% |
| 3338   | DNAJC4    |   |   |   |  |   |   | BC044584  | 39.33  | 1.90 | 72% |
| 1106   | CHD2      |   |   |   |  |   |   | BC007347  | 60.14  | 1.90 | 72% |
| 200576 | PIP5K3    |   |   |   |  |   |   | NM_152671 | 13.00  | 1.91 | 72% |
| 3364   | HUS1      |   |   |   |  |   |   | NM_004507 | 48.86  | 1.91 | 72% |
| 133874 | LOC133874 |   |   |   |  |   |   | BC030767  | 15.28  | 1.93 | 72% |
| 5270   | SERPINE2  |   |   |   |  |   | Y | NM_006216 | 24.25  | 1.93 | 72% |
| 51322  | WAC       |   |   |   |  |   |   | BC010356  | 28.72  | 1.93 | 72% |
| 595    | CCND1     |   |   |   |  |   |   | NM_053056 | 32.03  | 1.93 | 72% |
| 124401 | ANKS3     |   |   |   |  |   |   | BC050387  | 46.39  | 1.93 | 72% |
| 6209   | RPS15     |   |   |   |  |   | Y | NM_001018 | 81.22  | 1.93 | 72% |
| 57117  | INTS12    |   |   |   |  |   |   | NM_020395 | 34.17  | 1.94 | 72% |
| 1022   | CDK7      |   |   |   |  |   | Y | NM_001799 | 16.31  | 1.94 | 72% |
| 51252  | LOC51252  |   |   |   |  |   | Y | BC038583  | 40.83  | 1.94 | 72% |
| 124790 | HEXIM2    |   |   | Y |  |   |   | NM_144608 | 73.94  | 1.94 | 72% |
| 5691   | PSMB3     |   |   |   |  |   |   | NM_002795 | 59.47  | 1.94 | 72% |
| 8314   | BAP1      |   |   |   |  |   |   | NM_004656 | 100.42 | 1.95 | 72% |
| 51776  | ZAK       |   |   |   |  |   | Y | NM_016653 | 64.00  | 1.95 | 72% |
| 64089  | SNX16     |   |   |   |  |   |   | NM_022133 | 19.92  | 1.95 | 72% |
| 130026 | ICA1L     |   |   |   |  | Y | Y | NM_138468 | 49.69  | 1.95 | 72% |
| 64081  | PBLD      |   | Y | Y |  |   |   | BC009738  | 41.19  | 1.96 | 72% |
| 53944  | CSNK1G1   |   |   |   |  |   |   | BC017236  | 26.64  | 1.96 | 72% |
| 55647  | RAB20     |   |   |   |  |   |   | NM_017817 | 28.97  | 1.97 | 72% |
| 55020  | FLJ20699  |   | Y | Y |  |   |   | BC018918  | 30.92  | 1.97 | 72% |
| 51567  | TTRAP     |   |   | Y |  |   |   | NM_016614 | 29.03  | 1.97 | 72% |

|        |           |   |  |   |  |   |   |              |        |      |     |
|--------|-----------|---|--|---|--|---|---|--------------|--------|------|-----|
| 4618   | MYF6      |   |  |   |  |   |   | NM_002469    | 50.69  | 1.97 | 72% |
| 7060   | THBS4     |   |  |   |  |   |   | BC050456     | 30.08  | 1.98 | 72% |
| 11245  | GPR176    |   |  |   |  |   |   | NM_007223    | 53.72  | 1.98 | 72% |
| 90203  | SNX21     |   |  |   |  |   |   | BC019823     | 43.86  | 1.98 | 72% |
| 11329  | STK38     |   |  |   |  |   |   | NM_007271    | 24.92  | 1.98 | 72% |
| 868    | CBLB      | Y |  |   |  |   |   | BC032851     | 124.53 | 1.99 | 72% |
| 8544   | PIR       |   |  |   |  |   | Y | NM_003662    | 96.86  | 1.99 | 72% |
| 113510 | HEL308    |   |  |   |  |   |   | BC011863     | 32.22  | 1.99 | 72% |
| 23154  | NCDN      |   |  |   |  |   |   | NM_014284    | 18.17  | 1.99 | 72% |
| 8773   | SNAP23    |   |  |   |  |   |   | NM_003825    | 15.94  | 1.99 | 72% |
| 10542  | HBXIP     |   |  |   |  |   |   | NM_006402    | 42.08  | 2.00 | 72% |
| 84946  | LTV1      |   |  |   |  |   |   | NM_032860    | 42.61  | 2.00 | 72% |
| 84934  | C12orf52  |   |  |   |  |   |   | NM_032848    | 28.69  | 2.00 | 72% |
| 6642   | SNX1      |   |  |   |  |   |   | NM_003099    | 50.31  | 2.01 | 72% |
| 5763   | PTMS      |   |  |   |  | Y |   | BC017025     | 49.42  | 2.01 | 72% |
| 6733   | SRPK2     |   |  |   |  |   |   | NM_182692    | 193.25 | 2.01 | 72% |
| 114897 | C1QTNF1   |   |  |   |  |   |   | NM_030968    | 18.28  | 2.01 | 72% |
| 2113   | ETS1      |   |  |   |  |   |   | BC017314     | 23.44  | 2.01 | 72% |
| 8449   | DHX16     |   |  |   |  |   |   | BC008825     | 32.61  | 2.01 | 72% |
| 5210   | PFKFB4    |   |  |   |  | Y |   | NM_004567    | 40.89  | 2.02 | 72% |
| 2824   | GPM6B     |   |  |   |  |   |   | NM_001001996 | 61.56  | 2.02 | 72% |
| 8650   | NUMB      |   |  |   |  |   |   | BC033824     | 10.25  | 2.02 | 72% |
| 5829   | PXN       |   |  |   |  |   |   | BC052611     | 67.89  | 2.02 | 72% |
| 57179  | KIAA1191  |   |  | Y |  |   |   | NM_020444    | 358.56 | 2.02 | 72% |
| 9748   | SLK       |   |  |   |  |   |   | NM_014720    | 136.94 | 2.03 | 72% |
| 81544  | GDPD5     |   |  |   |  |   |   | BC020203     | 50.08  | 2.03 | 72% |
| 56931  | DUS3L     |   |  | Y |  |   |   | NM_020175    | 53.78  | 2.03 | 72% |
| 51239  | ANKRD39   |   |  |   |  |   |   | NM_016466    | 44.83  | 2.03 | 72% |
| 28974  | C19orf53  |   |  |   |  |   |   | NM_014047    | 139.92 | 2.03 | 72% |
| 9528   | TMEM59    |   |  |   |  |   | Y | BC003106     | 28.56  | 2.04 | 72% |
| 85409  | NKD2      |   |  |   |  |   | Y | BC012176     | 58.44  | 2.04 | 72% |
| 80013  | C10orf97  |   |  |   |  | Y |   | BC020605     | 42.39  | 2.04 | 72% |
| 130074 | LOC130074 |   |  |   |  |   |   | NM_001009993 | 60.42  | 2.05 | 72% |
| 7298   | TYMS      |   |  |   |  |   |   | NM_001071    | 32.19  | 2.05 | 72% |
| 27128  | PSCD4     |   |  |   |  |   | Y | NM_013385    | 59.19  | 2.05 | 72% |
| 7296   | TXNRD1    |   |  |   |  |   |   | BC018122     | 54.22  | 2.06 | 72% |
| 2775   | GNAO1     |   |  |   |  |   |   | BC030027     | 30.17  | 2.06 | 72% |
| 121536 | AEBP2     |   |  |   |  |   |   | NM_153207    | 151.03 | 2.07 | 72% |
| 8100   | IFT88     |   |  |   |  |   |   | BC030776     | 16.94  | 2.07 | 72% |
| 1859   | DYRK1A    |   |  |   |  |   |   | NM_001396    | 23.61  | 2.07 | 72% |
| 5272   | SERPINB9  | Y |  |   |  |   |   | NM_004155    | 27.86  | 2.07 | 72% |
| 91937  | TIMD4     |   |  |   |  |   |   | NM_138379    | 14.83  | 2.07 | 72% |
| 8445   | DYRK2     |   |  |   |  |   | Y | NM_003583    | 41.53  | 2.07 | 72% |
| 23673  | STX12     |   |  |   |  |   |   | NM_177424    | 31.36  | 2.08 | 72% |
| 2961   | GTF2E2    |   |  |   |  |   |   | NM_002095    | 43.17  | 2.08 | 72% |
| 64094  | SMOC2     |   |  |   |  |   | Y | BC047583     | 34.22  | 2.08 | 72% |
| 4355   | MPP2      |   |  |   |  |   |   | BC030287     | 28.14  | 2.08 | 72% |
| 23678  | SGK3      |   |  |   |  |   |   | NM_013257    | 30.00  | 2.08 | 72% |
| 51372  | CCDC72    |   |  |   |  |   |   | NM_015933    | 54.56  | 2.08 | 72% |
| 1942   | EFNA1     |   |  |   |  |   |   | BC032698     | 36.78  | 2.09 | 72% |
| 51095  | TRNT1     |   |  |   |  |   | Y | NM_016000    | 72.94  | 2.10 | 72% |
| 9577   | BRE       |   |  |   |  |   |   | NM_199191    | 24.67  | 2.10 | 72% |

|        |           |   |   |   |  |  |   |   |           |        |      |     |
|--------|-----------|---|---|---|--|--|---|---|-----------|--------|------|-----|
| 7076   | TIMP1     |   |   |   |  |  |   | Y | NM_003254 | 23.58  | 2.10 | 72% |
| 8672   | EIF4G3    |   |   |   |  |  |   |   | BC030578  | 22.47  | 2.10 | 72% |
| 29957  | SLC25A24  |   |   |   |  |  |   |   | BC029377  | 30.53  | 2.10 | 72% |
| 2978   | GUCA1A    |   |   |   |  |  |   |   | BC031663  | 37.75  | 2.10 | 72% |
| 115752 | DIS3L     |   |   |   |  |  |   |   | NM_133375 | 31.53  | 2.11 | 72% |
| 79629  | OCEL1     |   |   |   |  |  |   |   | NM_024578 | 27.67  | 2.11 | 72% |
| 1456   | CSNK1G3   |   |   |   |  |  |   |   | NM_004384 | 36.81  | 2.11 | 72% |
| 5058   | PAK1      |   |   |   |  |  |   |   | BC050377  | 18.75  | 2.11 | 72% |
| 5965   | RECQL     |   |   |   |  |  |   |   | BC001052  | 88.97  | 2.11 | 72% |
| 9455   | HOMER2    |   |   |   |  |  |   |   | BC012109  | 50.67  | 2.12 | 72% |
| 51389  | RWDD1     |   |   |   |  |  |   |   | BC015802  | 32.83  | 2.12 | 72% |
| 64225  | ARL6IP2   |   |   | Y |  |  |   |   | BC053508  | 29.17  | 2.12 | 72% |
| 51386  | EIF3S6IP  |   |   |   |  |  |   |   | NM_016091 | 21.39  | 2.13 | 72% |
| 4493   | MT1E      |   | Y | Y |  |  |   |   | BC009699  | 15.03  | 2.13 | 72% |
| 5433   | POLR2D    |   |   |   |  |  |   |   | BC010427  | 63.25  | 2.13 | 72% |
| 8801   | SUCLG2    |   |   | Y |  |  |   |   | NM_003848 | 130.61 | 2.14 | 72% |
| 94015  | TTYH2     |   |   |   |  |  |   | Y | BC004233  | 36.61  | 2.15 | 72% |
| 54097  | FAM3B     |   |   |   |  |  |   |   | BC057829  | 20.44  | 2.15 | 72% |
| 80007  | C10orf88  |   |   |   |  |  |   |   | BC032645  | 51.11  | 2.15 | 72% |
| 57189  | KIAA1147  |   |   | Y |  |  |   |   | BC012493  | 23.97  | 2.16 | 72% |
| 84108  | PCGF6     |   |   |   |  |  |   | Y | BC007602  | 64.83  | 2.16 | 72% |
| 171546 | C14orf147 |   |   |   |  |  |   | Y | NM_138288 | 27.11  | 2.17 | 72% |
| 81887  | LAS1L     |   |   |   |  |  |   |   | BC019302  | 26.58  | 2.18 | 72% |
| 3029   | HAGH      |   | Y | Y |  |  |   |   | NM_005326 | 18.47  | 2.18 | 72% |
| 35     | ACADS     |   | Y | Y |  |  |   |   | BC025963  | 29.11  | 2.18 | 72% |
| 51397  | COMMD10   |   |   |   |  |  |   |   | NM_016144 | 10.00  | 2.18 | 72% |
| 6566   | SLC16A1   |   |   | Y |  |  |   |   | BC026317  | 33.39  | 2.19 | 72% |
| 8560   | DEGS1     |   |   |   |  |  |   |   | BC000961  | 40.72  | 2.20 | 72% |
| 55048  | VPS37C    |   |   |   |  |  |   |   | NM_017966 | 21.19  | 2.20 | 72% |
| 5910   | RAP1GDS1  |   |   |   |  |  |   |   | NM_021159 | 19.78  | 2.20 | 72% |
| 58490  | C20orf77  |   |   |   |  |  |   |   | BC033629  | 68.31  | 2.21 | 72% |
| 29993  | PACSIN1   |   |   |   |  |  |   |   | NM_020804 | 31.50  | 2.21 | 72% |
| 3766   | KCNJ10    |   | Y |   |  |  | Y |   | BC034036  | 25.14  | 2.22 | 72% |
| 4294   | MAP3K10   |   |   |   |  |  |   |   | NM_002446 | 159.86 | 2.22 | 72% |
| 128414 | C20orf58  |   |   | Y |  |  |   |   | NM_152864 | 21.39  | 2.22 | 72% |
| 9655   | SOCS5     |   |   |   |  |  |   |   | BC032862  | 17.36  | 2.22 | 72% |
| 23367  | LARP1     |   |   |   |  |  |   |   | BC033856  | 190.22 | 2.23 | 72% |
| 6242   | RTKN      |   |   | Y |  |  |   |   | NM_033046 | 140.44 | 2.23 | 72% |
| 57136  | C20orf3   |   |   |   |  |  |   |   | NM_020531 | 31.97  | 2.24 | 72% |
| 54065  | C21orf51  |   |   |   |  |  |   |   | BC015596  | 10.25  | 2.24 | 72% |
| 25987  | TSKU      |   |   |   |  |  |   |   | BC020975  | 16.44  | 2.24 | 72% |
| 79019  | CENPM     |   |   |   |  |  |   | Y | NM_024053 | 48.00  | 2.24 | 72% |
| 10558  | SPTLC1    |   |   |   |  |  |   |   | NM_178324 | 29.22  | 2.25 | 72% |
| 2117   | ETV3      |   |   |   |  |  |   | Y | NM_005240 | 27.36  | 2.25 | 72% |
| 51116  | MRPS2     |   |   |   |  |  |   |   | NM_016034 | 46.53  | 2.26 | 72% |
| 4276   | MICA      | Y |   |   |  |  |   |   | BC016929  | 39.92  | 2.26 | 72% |
| 54802  | TRIT1     |   |   |   |  |  |   |   | BC010741  | 18.94  | 2.26 | 72% |
| 26355  | C3orf28   |   |   |   |  |  |   |   | BC010896  | 19.36  | 2.27 | 72% |
| 64792  | RABL5     |   |   |   |  |  |   |   | NM_022777 | 32.61  | 2.27 | 72% |
| 9196   | KCNAB3    |   |   |   |  |  |   |   | NM_004732 | 191.36 | 2.28 | 72% |
| 144699 | FBXL14    |   |   |   |  |  |   |   | NM_152441 | 18.56  | 2.28 | 72% |
| 8318   | CDC45L    |   |   |   |  |  |   |   | NM_003504 | 37.58  | 2.28 | 72% |

|        |           |   |   |   |  |   |   |           |        |      |     |
|--------|-----------|---|---|---|--|---|---|-----------|--------|------|-----|
| 6715   | SRD5A1    |   |   |   |  |   |   | NM_001047 | 30.53  | 2.29 | 72% |
| 65977  | PLEKHA3   |   |   |   |  |   |   | BC044567  | 39.61  | 2.29 | 72% |
| 11082  | ESM1      | Y | Y | Y |  |   |   | BC011989  | 20.64  | 2.30 | 72% |
| 10400  | PEMT      |   |   |   |  |   |   | BC000557  | 33.31  | 2.30 | 72% |
| 494143 | CHAC2     |   |   |   |  |   |   | BC019239  | 50.00  | 2.30 | 72% |
| 5866   | RAB3IL1   |   |   | Y |  |   |   | NM_013401 | 56.78  | 2.30 | 72% |
| 5530   | PPP3CA    |   |   |   |  |   |   | BC025714  | 16.00  | 2.32 | 72% |
| 28513  | CDH19     |   |   |   |  |   |   | BC015877  | 13.08  | 2.32 | 72% |
| 1018   | CDK3      |   |   |   |  |   |   | NM_001258 | 12.28  | 2.33 | 72% |
| 129446 | CMYA3     |   |   |   |  |   |   | BC022888  | 26.25  | 2.34 | 72% |
| 6819   | SULT1C1   |   | Y | Y |  |   |   | NM_001056 | 26.19  | 2.35 | 72% |
| 11252  | PACSIN2   |   |   |   |  |   |   | BC008037  | 120.08 | 2.35 | 72% |
| 7718   | ZNF165    |   |   |   |  |   |   | NM_003447 | 24.47  | 2.35 | 72% |
| 5957   | RCVRN     |   |   |   |  |   |   | NM_002903 | 41.25  | 2.36 | 72% |
| 79706  | PRKRIP1   |   |   |   |  |   |   | BC014298  | 41.72  | 2.36 | 72% |
| 23710  | GABARAPL1 |   |   |   |  |   |   | NM_031412 | 168.92 | 2.37 | 72% |
| 9667   | SAFB2     |   | Y | Y |  |   |   | BC025279  | 26.19  | 2.37 | 72% |
| 331    | BIRC4     |   | Y | Y |  |   |   | NM_001167 | 145.31 | 2.38 | 72% |
| 26155  | NOC2L     |   |   |   |  |   |   | BC003555  | 114.22 | 2.38 | 72% |
| 55120  | FANCL     |   |   |   |  |   |   | BC054517  | 27.58  | 2.38 | 72% |
| 23205  | ACSBG1    |   |   |   |  |   |   | BC009289  | 28.17  | 2.38 | 72% |
| 9128   | PRPF4     |   |   |   |  |   |   | NM_004697 | 24.17  | 2.39 | 72% |
| 3087   | HHEX      | Y |   |   |  |   | Y | BC014336  | 27.86  | 2.39 | 72% |
| 79132  | LGP2      |   |   |   |  |   |   | BC014949  | 157.50 | 2.39 | 72% |
| 23398  | PPWD1     |   |   |   |  |   |   | NM_015342 | 22.75  | 2.40 | 72% |
| 26073  | POLDIP2   |   |   |   |  |   |   | NM_015584 | 60.64  | 2.41 | 72% |
| 90933  | TRIM41    |   |   |   |  |   |   | BC009762  | 96.56  | 2.42 | 72% |
| 57120  | GOPC      |   |   |   |  |   |   | BC009553  | 6.89   | 2.42 | 72% |
| 64223  | GBL       |   |   |   |  |   |   | NM_022372 | 15.72  | 2.44 | 72% |
| 27245  | AHDC1     |   |   |   |  |   |   | BC002677  | 40.72  | 2.45 | 72% |
| 10327  | AKR1A1    |   | Y | Y |  |   |   | NM_153326 | 33.69  | 2.45 | 72% |
| 10982  | MAPRE2    |   |   |   |  |   |   | NM_014268 | 23.17  | 2.45 | 72% |
| 5890   | RAD51L1   |   |   |   |  |   |   | BC030219  | 49.33  | 2.45 | 72% |
| 2584   | GALK1     |   |   |   |  |   |   | NM_000154 | 23.11  | 2.46 | 72% |
| 5590   | PRKCZ     |   |   | Y |  |   |   | NM_002744 | 103.92 | 2.47 | 72% |
| 57097  | PARP11    |   |   |   |  |   |   | BC031073  | 44.00  | 2.48 | 72% |
| 2152   | F3        | Y |   |   |  |   | Y | NM_001993 | 16.22  | 2.48 | 72% |
| 91647  | ATPAF2    |   |   |   |  |   |   | NM_145691 | 46.44  | 2.48 | 72% |
| 115024 | NT5C3L    |   |   |   |  |   |   | NM_052935 | 31.81  | 2.49 | 72% |
| 23429  | RYBP      |   |   |   |  |   |   | BC014959  | 100.47 | 2.50 | 72% |
| 129787 | TMEM18    |   |   |   |  |   |   | BC032379  | 22.58  | 2.52 | 72% |
| 54969  | C4orf27   |   |   |   |  |   |   | NM_017867 | 10.33  | 2.52 | 72% |
| 29121  | CLEC2D    |   |   |   |  |   | Y | BC019883  | 30.75  | 2.52 | 72% |
| 10623  | POLR3C    |   |   |   |  |   |   | BC004424  | 31.47  | 2.53 | 72% |
| 23450  | SF3B3     |   |   |   |  |   |   | BC000463  | 13.19  | 2.53 | 72% |
| 10083  | USH1C     |   | Y | Y |  |   |   | BC016057  | 18.92  | 2.54 | 72% |
| 7763   | ZFAND5    |   |   |   |  |   |   | NM_006007 | 12.58  | 2.57 | 72% |
| 7027   | TFDP1     |   |   |   |  |   |   | NM_007111 | 29.19  | 2.57 | 72% |
| 23107  | MRPS27    |   |   |   |  |   |   | BC030521  | 45.11  | 2.57 | 72% |
| 56940  | DUSP22    |   |   |   |  | Y |   | NM_020185 | 14.42  | 2.58 | 72% |
| 64802  | NMNAT1    |   |   |   |  |   |   | NM_022787 | 43.72  | 2.58 | 72% |
| 4109   | MAGEA10   |   |   |   |  |   |   | NM_021048 | 31.28  | 2.58 | 72% |

|        |           |   |   |   |  |   |   |   |           |        |      |     |
|--------|-----------|---|---|---|--|---|---|---|-----------|--------|------|-----|
| 399    | RHOH      |   |   |   |  |   |   |   | NM_004310 | 49.25  | 2.58 | 72% |
| 9397   | NMT2      |   |   |   |  |   |   |   | BC006376  | 48.67  | 2.59 | 72% |
| 92181  | UBTD2     |   |   |   |  |   |   |   | NM_152277 | 20.14  | 2.60 | 72% |
| 4176   | MCM7      |   |   |   |  |   |   |   | BC009398  | 71.19  | 2.61 | 72% |
| 1487   | CTBP1     |   |   |   |  |   |   |   | BC053320  | 19.89  | 2.62 | 72% |
| 8522   | GAS7      |   |   |   |  |   |   |   | BC001152  | 28.28  | 2.62 | 72% |
| 4237   | MFAP2     |   |   |   |  | Y | Y |   | NM_002403 | 16.50  | 2.62 | 72% |
| 112817 | C10orf65  |   | Y | Y |  |   |   |   | NM_138413 | 21.61  | 2.63 | 72% |
| 55651  | NOLA2     |   |   |   |  |   |   |   | NM_017838 | 164.72 | 2.64 | 72% |
| 1070   | CETN3     |   |   |   |  |   |   |   | BC005383  | 15.25  | 2.64 | 72% |
| 94274  | PPP1R14A  |   |   |   |  |   | Y |   | NM_033256 | 17.58  | 2.65 | 72% |
| 5481   | PPID      |   |   |   |  |   |   |   | NM_005038 | 89.75  | 2.68 | 72% |
| 5876   | RABGGTB   |   |   |   |  |   |   |   | NM_004582 | 62.81  | 2.69 | 72% |
| 22911  | WDR47     |   |   |   |  |   |   |   | BC034964  | 45.61  | 2.69 | 72% |
| 29920  | PYCR2     |   |   |   |  |   |   |   | NM_013328 | 16.58  | 2.70 | 72% |
| 51633  | OTUD6B    |   |   |   |  |   |   |   | BC029760  | 45.50  | 2.72 | 72% |
| 3932   | LCK       |   |   |   |  | Y | Y |   | BC013200  | 27.50  | 2.72 | 72% |
| 2810   | SFN       |   |   |   |  |   |   |   | NM_006142 | 46.64  | 2.72 | 72% |
| 80146  | UXS1      |   |   |   |  |   |   |   | BC009819  | 16.11  | 2.74 | 72% |
| 3217   | HOXB7     |   |   |   |  |   |   |   | NM_004502 | 16.25  | 2.75 | 72% |
| 117247 | SLC16A10  |   |   | Y |  |   |   |   | BC017968  | 27.72  | 2.75 | 72% |
| 56952  | PRTFDC1   |   |   |   |  |   | Y |   | NM_020200 | 20.22  | 2.77 | 72% |
| 8417   | STX7      |   |   |   |  |   |   |   | BC011975  | 28.33  | 2.78 | 72% |
| 245711 | SPDYA     |   |   |   |  |   |   |   | NM_182756 | 23.00  | 2.78 | 72% |
| 11014  | KDEL2     |   |   |   |  |   |   |   | NM_006854 | 30.64  | 2.79 | 72% |
| 7170   | TPM3      |   |   |   |  |   |   |   | BC008407  | 23.89  | 2.80 | 72% |
| 8208   | CHAF1B    |   |   |   |  |   |   |   | NM_005441 | 156.33 | 2.81 | 72% |
| 51538  | ZCCHC17   |   |   |   |  |   |   |   | NM_016505 | 52.42  | 2.81 | 72% |
| 10402  | ST3GAL6   | Y |   |   |  |   |   |   | NM_006100 | 17.19  | 2.82 | 72% |
| 124220 | LOC124220 |   |   |   |  |   |   |   | NM_145252 | 20.44  | 2.82 | 72% |
| 84542  | KIAA1841  |   |   |   |  |   |   |   | NM_032506 | 28.89  | 2.83 | 72% |
| 5236   | PGM1      |   |   |   |  |   |   |   | NM_002633 | 27.06  | 2.83 | 72% |
| 2632   | GBE1      |   |   |   |  |   |   |   | BC012098  | 15.64  | 2.85 | 72% |
| 2030   | SLC29A1   |   |   |   |  |   |   |   | NM_004955 | 25.33  | 2.85 | 72% |
| 1579   | CYP4A11   |   | Y | Y |  |   |   |   | BC022851  | 18.11  | 2.86 | 72% |
| 79648  | MCPH1     |   |   |   |  |   |   |   | BC030702  | 32.17  | 2.88 | 72% |
| 54859  | TMEM103   |   |   |   |  |   |   |   | BC000623  | 9.22   | 2.91 | 72% |
| 5478   | PPIA      |   |   |   |  |   |   |   | BC005982  | 35.81  | 2.92 | 72% |
| 10620  | ARID3B    |   |   |   |  |   |   |   | BC060824  | 40.50  | 2.93 | 72% |
| 1032   | CDKN2D    |   |   |   |  |   |   |   | NM_001800 | 26.08  | 2.93 | 72% |
| 2065   | ERBB3     |   | Y | Y |  |   | Y |   | BC002706  | 11.47  | 2.96 | 72% |
| 10963  | STIP1     |   |   |   |  |   |   |   | NM_006819 | 101.03 | 2.98 | 72% |
| 6199   | RPS6KB2   |   |   |   |  |   |   |   | BC006106  | 75.31  | 3.03 | 72% |
| 1891   | ECH1      |   |   |   |  |   |   |   | BC011792  | 124.94 | 3.03 | 72% |
| 199    | AIF1      | Y |   |   |  |   |   |   | NM_001623 | 12.72  | 3.03 | 72% |
| 57157  | PHTF2     |   |   |   |  |   |   |   | BC032334  | 31.89  | 3.04 | 72% |
| 55287  | TMEM40    |   |   |   |  |   |   |   | BC020658  | 42.11  | 3.08 | 72% |
| 85480  | TSLP      |   |   |   |  |   | Y | Y | NM_138551 | 133.00 | 3.10 | 72% |
| 768    | CA9       |   |   |   |  |   |   |   | NM_001216 | 42.92  | 3.10 | 72% |
| 957    | ENTPD5    |   | Y | Y |  |   |   |   | BC020966  | 21.75  | 3.11 | 72% |
| 219557 | MGC26647  |   |   |   |  |   |   |   | NM_152706 | 16.58  | 3.13 | 72% |
| 200316 | APOBEC3F  |   |   |   |  |   |   | Y | BC038808  | 31.31  | 3.14 | 72% |



|        |          |   |  |   |   |   |   |   |           |        |      |     |
|--------|----------|---|--|---|---|---|---|---|-----------|--------|------|-----|
| 51108  | METTL9   |   |  | Y |   |   |   |   | NM_016025 | 41.78  | 3.15 | 72% |
| 6905   | TBCE     |   |  |   |   |   |   |   | NM_003193 | 41.67  | 3.17 | 72% |
| 8550   | MAPKAPK5 |   |  |   |   |   |   |   | NM_003668 | 11.42  | 3.18 | 72% |
| 55890  | GPRC5C   |   |  |   |   |   |   |   | BC004925  | 11.06  | 3.19 | 72% |
| 401466 | C8orf59  |   |  |   |   |   |   |   | BC032347  | 53.19  | 3.20 | 72% |
| 23313  | C22orf9  |   |  |   |   |   | Y |   | BC053595  | 22.47  | 3.22 | 72% |
| 55701  | FLJ10357 | Y |  |   |   |   |   |   | BC000084  | 73.94  | 3.23 | 72% |
| 23406  | COTL1    |   |  | Y |   |   |   |   | NM_021149 | 64.86  | 3.26 | 72% |
| 23682  | RAB38    |   |  |   |   |   |   | Y | NM_022337 | 50.17  | 3.28 | 72% |
| 8031   | NCOA4    |   |  |   |   |   |   |   | BC012736  | 78.56  | 3.33 | 72% |
| 84866  | TMEM25   |   |  |   |   |   |   |   | BC051841  | 24.92  | 3.41 | 72% |
| 9694   | TTC35    |   |  |   |   |   |   |   | NM_014673 | 16.50  | 3.43 | 72% |
| 55907  | CMAS     |   |  |   |   |   |   |   | BC016609  | 309.11 | 3.46 | 72% |
| 9873   | FCHSD2   | Y |  |   |   |   |   |   | BC010394  | 28.17  | 3.49 | 72% |
| 5859   | QARS     |   |  |   |   |   |   |   | BC016634  | 8.64   | 3.50 | 72% |
| 129880 | BBS5     |   |  |   |   |   |   |   | BC044593  | 15.92  | 3.52 | 72% |
| 80333  | KCNIP4   |   |  |   |   |   |   | Y | NM_025221 | 62.36  | 3.53 | 72% |
| 2048   | EPHB2    |   |  |   |   |   |   |   | NM_004442 | 28.81  | 3.53 | 72% |
| 726    | CAPN5    |   |  |   |   |   |   |   | NM_004055 | 538.67 | 3.55 | 72% |
| 9832   | JAKMIP2  |   |  |   |   |   |   | Y | NM_014790 | 20.11  | 3.61 | 72% |
| 3669   | ISG20    |   |  |   |   |   |   | Y | NM_002201 | 18.78  | 3.61 | 72% |
| 3005   | H1F0     |   |  |   | Y | Y | Y |   | BC029046  | 33.89  | 3.65 | 72% |
| 84261  | FBXW9    |   |  |   |   |   |   |   | NM_032301 | 21.31  | 3.67 | 72% |
| 55696  | RBM22    |   |  |   |   |   |   |   | NM_018047 | 41.89  | 3.70 | 72% |
| 9367   | RAB9A    |   |  |   |   |   |   |   | NM_004251 | 265.86 | 3.77 | 72% |
| 8428   | STK24    |   |  |   |   |   |   |   | NM_003576 | 15.28  | 3.80 | 72% |
| 348235 | FAM33A   |   |  |   |   |   |   |   | BC017873  | 14.67  | 3.81 | 72% |
| 56915  | EXOSC5   |   |  |   |   |   |   | Y | BC007742  | 54.33  | 3.81 | 72% |
| 5928   | RBBP4    |   |  |   |   |   |   |   | NM_005610 | 56.72  | 3.82 | 72% |
| 56900  | C1orf119 |   |  |   |   |   |   |   | NM_020141 | 22.67  | 4.01 | 72% |
| 55118  | CRTAC1   |   |  |   |   |   |   | Y | BC034245  | 59.17  | 4.04 | 72% |
| 122616 | C14orf79 |   |  |   |   |   |   |   | NM_174891 | 24.03  | 4.25 | 72% |
| 219902 | TMEM136  |   |  |   |   |   |   | Y | NM_174926 | 13.00  | 4.27 | 72% |
| 1620   | DBC1     |   |  |   |   |   |   |   | BC021560  | 17.92  | 4.27 | 72% |
| 8725   | C19orf2  |   |  |   |   |   |   |   | BC026184  | 19.00  | 4.28 | 72% |
| 29995  | LMCD1    |   |  |   |   |   |   |   | NM_014583 | 142.67 | 4.29 | 72% |
| 6512   | SLC1A7   |   |  |   |   |   |   |   | BC000651  | 11.67  | 4.34 | 72% |
| 4774   | NFIA     |   |  |   |   |   |   | Y | NM_005595 | 80.69  | 4.39 | 72% |
| 6141   | RPL18    |   |  |   |   |   |   | Y | NM_000979 | 20.19  | 4.45 | 72% |
| 27152  | INTU     |   |  |   |   |   |   |   | BC051698  | 13.67  | 4.50 | 72% |
| 125170 | SMCR7    |   |  |   |   |   |   |   | NM_139162 | 8.22   | 4.53 | 72% |
| 9399   | STOML1   |   |  |   |   |   |   |   | NM_004809 | 20.17  | 4.69 | 72% |
| 23304  | UBR2     |   |  |   |   |   |   |   | BC064512  | 16.31  | 4.73 | 72% |
| 123036 | MTAC2D1  |   |  |   |   |   |   |   | NM_152332 | 19.81  | 4.85 | 72% |
| 23237  | ARC      |   |  |   |   |   |   |   | NM_015193 | 7.67   | 4.96 | 72% |
| 7320   | UBE2B    |   |  |   |   |   |   |   | NM_003337 | 4.22   | 5.24 | 72% |
| 153579 | BTNL9    | Y |  |   |   |   |   |   | BC062459  | 24.72  | 5.34 | 72% |
| 759    | CA1      |   |  |   |   |   |   |   | NM_001738 | 8.94   | 5.41 | 72% |
| 9482   | STX8     |   |  |   |   |   |   |   | NM_004853 | 19.44  | 5.53 | 72% |
| 54853  | WDR55    |   |  |   |   |   |   |   | NM_017706 | 12.97  | 5.81 | 72% |
| 51710  | ZNF44    |   |  |   |   |   |   |   | BC032246  | 20.56  | 5.83 | 72% |
| 284273 | ZADH2    |   |  |   |   |   |   |   | NM_175907 | 20.86  | 6.17 | 72% |

|        |           |  |   |   |  |  |  |   |           |        |         |     |
|--------|-----------|--|---|---|--|--|--|---|-----------|--------|---------|-----|
| 56     | ACRV1     |  |   |   |  |  |  | Y | NM_001612 | 45.72  | 6.21    | 72% |
| 6098   | ROS1      |  |   |   |  |  |  |   | NM_002944 | 38.64  | 6.41    | 72% |
| 54801  | FAM29A    |  |   |   |  |  |  |   | BC010632  | 26.25  | 6.61    | 72% |
| 11278  | KLF12     |  |   |   |  |  |  |   | NM_007249 | 8.58   | 6.68    | 72% |
| 3516   | RBPSUH    |  |   |   |  |  |  |   | NM_203284 | 114.86 | 6.68    | 72% |
| 27301  | APEX2     |  |   |   |  |  |  |   | NM_014481 | 109.44 | 6.97    | 72% |
| 2962   | GTF2F1    |  |   |   |  |  |  |   | BC000120  | 10.42  | 7.12    | 72% |
| 3337   | DNAJB1    |  |   |   |  |  |  |   | NM_006145 | 14.61  | 7.14    | 72% |
| 221476 | PI16      |  |   |   |  |  |  | Y | BC035634  | 10.47  | 7.26    | 72% |
| 2868   | GRK4      |  |   |   |  |  |  |   | NM_182982 | 26.03  | 7.34    | 72% |
| 399665 | FAM102A   |  |   |   |  |  |  | Y | NM_203305 | 59.50  | 7.36    | 72% |
| 10426  | TUBGCP3   |  |   |   |  |  |  |   | BC007763  | 7.75   | 7.69    | 72% |
| 115416 | C7orf30   |  |   |   |  |  |  |   | NM_138446 | 2.08   | 8.06    | 72% |
| 23157  | Sep6      |  |   |   |  |  |  |   | NM_145802 | 11.61  | 8.39    | 72% |
| 54778  | RNF111    |  |   |   |  |  |  |   | BC010369  | 102.50 | 8.79    | 72% |
| 3958   | LGALS3    |  |   |   |  |  |  | Y | BC001120  | 11.50  | 8.95    | 72% |
| 9862   | THRAP4    |  |   |   |  |  |  |   | NM_014815 | 15.39  | 9.76    | 72% |
| 7205   | TRIP6     |  |   |   |  |  |  |   | BC002680  | 4.72   | 10.25   | 72% |
| 486    | FXYD2     |  | Y | Y |  |  |  |   | NM_001680 | 4.39   | 10.31   | 72% |
| 56658  | TRIM39    |  |   |   |  |  |  |   | NM_172016 | 6.33   | 10.72   | 72% |
| 143241 | DYDC1     |  |   |   |  |  |  |   | NM_138812 | 12.50  | 10.89   | 72% |
| 5510   | PPP1R7    |  |   |   |  |  |  |   | BC012397  | 4.83   | 10.97   | 72% |
| 57408  | LRTM1     |  |   |   |  |  |  |   | BC040732  | 4.75   | 13.01   | 72% |
| 57110  | HRASLS    |  |   |   |  |  |  |   | BC048095  | 5.22   | 20.10   | 72% |
| 25920  | COBRA1    |  |   |   |  |  |  |   | BC011892  | 3.31   | 21.61   | 72% |
| 1615   | DARS      |  |   |   |  |  |  |   | NM_001349 | 6.06   | 23.56   | 72% |
| 55088  | C10orf118 |  |   |   |  |  |  |   | BC030557  | 3.72   | 32.09   | 72% |
| 83461  | CDCA3     |  |   |   |  |  |  | Y | NM_031299 | -0.25  | -329.81 | 67% |
| 9168   | TMSB10    |  |   |   |  |  |  | Y | NM_021103 | -0.69  | -102.01 | 67% |
| 25956  | SEC31B    |  |   |   |  |  |  |   | BC044569  | -2.81  | -72.79  | 67% |
| 1017   | CDK2      |  |   |   |  |  |  |   | BC003065  | -5.89  | -55.79  | 67% |
| 23552  | CCRK      |  |   |   |  |  |  |   | BC002655  | -3.00  | -43.19  | 67% |
| 10538  | BATF      |  |   |   |  |  |  | Y | NM_006399 | -5.86  | -29.62  | 67% |
| 10240  | MRPS31    |  |   |   |  |  |  |   | BC022045  | -1.97  | -28.93  | 67% |
| 9342   | SNAP29    |  | Y | Y |  |  |  |   | NM_004782 | -13.72 | -18.66  | 67% |
| 55103  | RALGPS2   |  |   |   |  |  |  |   | NM_152663 | -12.33 | -18.45  | 67% |
| 56910  | STARD7    |  |   |   |  |  |  |   | BC007894  | -3.53  | -18.37  | 67% |
| 84288  | EFCAB2    |  |   |   |  |  |  |   | NM_032328 | -4.06  | -17.98  | 67% |
| 1965   | EIF2S1    |  |   |   |  |  |  |   | NM_004094 | -8.28  | -16.66  | 67% |
| 4361   | MRE11A    |  | Y |   |  |  |  |   | BC005241  | -4.03  | -15.74  | 67% |
| 6647   | SOD1      |  |   |   |  |  |  |   | NM_000454 | -15.39 | -13.88  | 67% |
| 5777   | PTPN6     |  |   |   |  |  |  |   | NM_080548 | -10.17 | -10.75  | 67% |
| 51377  | UCHL5     |  |   |   |  |  |  |   | BC025369  | -25.86 | -8.58   | 67% |
| 813    | CALU      |  |   |   |  |  |  |   | NM_001219 | -89.19 | -7.37   | 67% |
| 117156 | SCGB3A2   |  |   |   |  |  |  | Y | NM_054023 | -34.44 | -6.94   | 67% |
| 6017   | RLBP1     |  |   |   |  |  |  |   | NM_000326 | -24.36 | -5.01   | 67% |
| 10078  | TSSC4     |  |   |   |  |  |  |   | BC050616  | -49.83 | -4.43   | 67% |
| 4832   | NME3      |  |   |   |  |  |  |   | BC000250  | 47.08  | 1.15    | 67% |
| 92597  | MOBKL1A   |  |   |   |  |  |  |   | NM_173468 | 18.69  | 1.28    | 67% |
| 7083   | TK1       |  |   |   |  |  |  | Y | BC007872  | 79.86  | 1.31    | 67% |
| 80824  | DUSP16    |  |   |   |  |  |  |   | BC042101  | 31.08  | 1.34    | 67% |
| 51334  | PRR16     |  |   |   |  |  |  | Y | BC038838  | 62.19  | 1.37    | 67% |

|        |          |   |   |   |  |  |   |           |        |      |     |
|--------|----------|---|---|---|--|--|---|-----------|--------|------|-----|
| 5567   | PRKACB   |   |   |   |  |  |   | BC035058  | 53.14  | 1.37 | 67% |
| 10383  | TUBB2C   |   | Y | Y |  |  |   | BC029529  | 51.06  | 1.37 | 67% |
| 10059  | DNM1L    |   |   |   |  |  |   | BC024590  | 56.75  | 1.38 | 67% |
| 57704  | GBA2     |   |   |   |  |  |   | NM_020944 | 69.03  | 1.41 | 67% |
| 269    | AMHR2    |   |   |   |  |  | Y | NM_020547 | 20.58  | 1.43 | 67% |
| 2239   | GPC4     |   |   |   |  |  |   | NM_001448 | 40.36  | 1.44 | 67% |
| 257364 | SH3PX3   |   |   |   |  |  |   | NM_153271 | 72.50  | 1.44 | 67% |
| 54793  | KCTD9    |   |   |   |  |  |   | NM_017634 | 43.03  | 1.46 | 67% |
| 133957 | CCDC127  |   |   |   |  |  |   | NM_145265 | 52.39  | 1.47 | 67% |
| 8382   | NME5     |   |   |   |  |  |   | NM_003551 | 30.58  | 1.47 | 67% |
| 7264   | TSTA3    |   |   |   |  |  |   | NM_003313 | 43.06  | 1.48 | 67% |
| 4801   | NFYB     |   |   |   |  |  |   | NM_006166 | 74.67  | 1.48 | 67% |
| 89891  | WDR34    |   |   |   |  |  |   | NM_052844 | 48.92  | 1.48 | 67% |
| 10121  | ACTR1A   |   |   |   |  |  |   | NM_005736 | 38.67  | 1.48 | 67% |
| 79364  | ZXDC     |   |   | Y |  |  |   | BC002940  | 31.89  | 1.49 | 67% |
| 2004   | ELK3     | Y |   |   |  |  |   | BC017371  | 74.64  | 1.49 | 67% |
| 3055   | HCK      |   |   |   |  |  |   | BC014435  | 85.47  | 1.49 | 67% |
| 9263   | STK17A   |   |   |   |  |  |   | NM_004760 | 132.81 | 1.49 | 67% |
| 4837   | NNMT     |   |   |   |  |  | Y | NM_006169 | 52.75  | 1.50 | 67% |
| 83719  | YPEL3    |   |   |   |  |  |   | NM_031477 | 41.92  | 1.50 | 67% |
| 2623   | GATA1    |   |   |   |  |  |   | BC009797  | 82.97  | 1.50 | 67% |
| 6850   | SYK      | Y |   |   |  |  |   | NM_003177 | 74.36  | 1.50 | 67% |
| 351    | APP      |   |   |   |  |  |   | NM_000484 | 20.78  | 1.51 | 67% |
| 7352   | UCP3     |   |   |   |  |  |   | BC008392  | 35.61  | 1.51 | 67% |
| 79731  | NARS2    |   |   |   |  |  |   | NM_024678 | 33.17  | 1.51 | 67% |
| 55031  | USP47    |   |   |   |  |  |   | BC000226  | 77.25  | 1.52 | 67% |
| 695    | BTK      |   |   |   |  |  | Y | NM_000061 | 111.14 | 1.52 | 67% |
| 393    | ARHGAP4  |   |   |   |  |  | Y | BC052303  | 138.33 | 1.52 | 67% |
| 57509  | MTUS1    |   |   |   |  |  |   | BC033842  | 55.19  | 1.52 | 67% |
| 2625   | GATA3    |   |   |   |  |  | Y | BC006793  | 21.81  | 1.52 | 67% |
| 1469   | CST1     |   |   |   |  |  | Y | NM_001898 | 19.94  | 1.52 | 67% |
| 4212   | MEIS2    |   |   |   |  |  |   | NM_170676 | 88.89  | 1.53 | 67% |
| 2260   | FGFR1    |   |   |   |  |  |   | NM_015850 | 25.72  | 1.54 | 67% |
| 7048   | TGFBR2   |   |   |   |  |  |   | NM_003242 | 425.64 | 1.54 | 67% |
| 54952  | TRSPAP1  |   |   |   |  |  |   | NM_017846 | 104.19 | 1.55 | 67% |
| 57614  | KIAA1468 |   |   |   |  |  |   | NM_020854 | 92.83  | 1.55 | 67% |
| 4675   | NAP1L3   |   |   |   |  |  |   | BC034954  | 225.47 | 1.56 | 67% |
| 8774   | NAPG     |   |   |   |  |  | Y | BC001889  | 22.78  | 1.58 | 67% |
| 7264   | TSTA3    |   |   |   |  |  |   | NM_003313 | 40.00  | 1.59 | 67% |
| 79039  | DDX54    |   |   |   |  |  |   | BC001132  | 50.33  | 1.59 | 67% |
| 29083  | GTPBP8   |   |   |   |  |  |   | BC010137  | 25.31  | 1.59 | 67% |
| 65991  | FUNDC2   |   |   |   |  |  |   | NM_023934 | 32.75  | 1.59 | 67% |
| 55033  | FKBP14   |   |   |   |  |  |   | NM_017946 | 38.00  | 1.60 | 67% |
| 10103  | TSPAN1   |   |   |   |  |  |   | NM_005727 | 16.61  | 1.60 | 67% |
| 377    | ARF3     |   |   |   |  |  |   | NM_001659 | 20.47  | 1.60 | 67% |
| 529    | ATP6V1E1 |   |   | Y |  |  |   | NM_001696 | 17.69  | 1.60 | 67% |
| 27040  | LAT      |   |   |   |  |  |   | BC011563  | 37.00  | 1.60 | 67% |
| 283197 | C11orf64 |   |   |   |  |  |   | NM_174939 | 43.28  | 1.60 | 67% |
| 4920   | ROR2     |   |   |   |  |  | Y | NM_004560 | 55.11  | 1.61 | 67% |
| 2043   | EPHA4    |   |   |   |  |  |   | NM_004438 | 65.36  | 1.62 | 67% |
| 6916   | TBXAS1   | Y |   |   |  |  |   | BC041157  | 32.69  | 1.63 | 67% |
| 23085  | ERC1     |   |   |   |  |  |   | BC005065  | 48.17  | 1.63 | 67% |

|        |           |   |   |   |  |   |   |              |        |      |     |
|--------|-----------|---|---|---|--|---|---|--------------|--------|------|-----|
| 81618  | ITM2C     |   |   |   |  |   |   | BC002424     | 29.81  | 1.63 | 67% |
| 215    | ABCD1     |   |   |   |  |   |   | NM_000033    | 31.17  | 1.63 | 67% |
| 55017  | C14orf119 |   |   |   |  |   |   | NM_017924    | 73.69  | 1.63 | 67% |
| 56269  | IRGC      |   |   |   |  |   |   | NM_019612    | 57.75  | 1.63 | 67% |
| 11197  | WIF1      |   |   |   |  |   |   | BC018037     | 38.28  | 1.63 | 67% |
| 51207  | DUSP13    |   |   |   |  |   |   | NM_016364    | 38.06  | 1.64 | 67% |
| 400713 | LOC400713 | Y |   |   |  |   |   | BC058819     | 24.78  | 1.64 | 67% |
| 79142  | PHF23     |   |   |   |  |   |   | BC002509     | 34.28  | 1.64 | 67% |
| 96459  | FNIP1     |   |   |   |  |   |   | BC001956     | 17.44  | 1.64 | 67% |
| 5203   | PFDN4     |   |   |   |  |   |   | NM_002623    | 34.75  | 1.64 | 67% |
| 65117  | RSRC2     |   |   |   |  |   |   | BC067773     | 124.67 | 1.64 | 67% |
| 4915   | NTRK2     |   | Y |   |  | Y |   | NM_001007097 | 27.64  | 1.65 | 67% |
| 51760  | SYT17     |   |   |   |  |   |   | BC004518     | 20.25  | 1.65 | 67% |
| 27020  | NPTN      |   |   |   |  |   |   | BC030773     | 15.42  | 1.65 | 67% |
| 11158  | RABL2B    |   |   |   |  |   |   | BC024281     | 54.81  | 1.65 | 67% |
| 56647  | BCCIP     |   |   |   |  |   |   | BC009771     | 57.47  | 1.65 | 67% |
| 57002  | C7orf36   |   |   |   |  |   |   | BC022043     | 30.92  | 1.65 | 67% |
| 25771  | TBC1D22A  |   |   |   |  |   |   | NM_014346    | 39.94  | 1.66 | 67% |
| 25880  | TMEM186   |   |   |   |  |   |   | BC015912     | 46.06  | 1.66 | 67% |
| 55531  | ELMOD1    |   |   |   |  |   |   | BC028725     | 34.14  | 1.67 | 67% |
| 5193   | PEX12     |   |   |   |  |   | Y | NM_000286    | 28.03  | 1.67 | 67% |
| 25817  | FAM19A5   |   |   |   |  |   | Y | NM_015381    | 17.58  | 1.67 | 67% |
| 51272  | BET1L     |   |   |   |  |   |   | NM_016526    | 49.33  | 1.67 | 67% |
| 26227  | PHGDH     |   |   |   |  |   |   | NM_006623    | 42.44  | 1.67 | 67% |
| 51111  | SUV420H1  |   |   |   |  |   |   | BC012933     | 31.75  | 1.68 | 67% |
| 4240   | MFGE8     |   |   |   |  |   |   | BC003610     | 51.86  | 1.68 | 67% |
| 11136  | SLC7A9    |   | Y | Y |  |   |   | NM_014270    | 26.42  | 1.68 | 67% |
| 25901  | CCDC28A   |   |   |   |  |   |   | BC000758     | 27.53  | 1.69 | 67% |
| 4507   | MTAP      |   |   |   |  |   | Y | BC018625     | 37.61  | 1.69 | 67% |
| 3265   | HRAS      |   |   |   |  |   |   | BC006499     | 25.06  | 1.70 | 67% |
| 26228  | BRDG1     |   |   |   |  | Y |   | NM_012108    | 35.61  | 1.70 | 67% |
| 5565   | PRKAB2    |   |   |   |  |   | Y | BC053610     | 27.53  | 1.70 | 67% |
| 79886  | C9orf82   |   |   |   |  |   |   | BC014658     | 46.83  | 1.70 | 67% |
| 65094  | JMJD4     |   |   |   |  |   |   | BC011928     | 32.58  | 1.70 | 67% |
| 22929  | SEPHS1    |   |   |   |  |   |   | NM_012247    | 19.64  | 1.70 | 67% |
| 5733   | PTGER3    |   | Y | Y |  | Y |   | BC024229     | 22.22  | 1.70 | 67% |
| 10856  | RUVBL2    |   |   |   |  |   |   | NM_006666    | 25.36  | 1.70 | 67% |
| 129285 | CCDC128   |   |   | Y |  |   |   | BC040721     | 35.39  | 1.70 | 67% |
| 11034  | DSTN      |   |   |   |  |   | Y | NM_006870    | 14.50  | 1.71 | 67% |
| 150280 | HORMAD2   |   |   |   |  |   |   | NM_152510    | 32.94  | 1.71 | 67% |
| 54760  | PCSK4     |   |   |   |  |   |   | NM_017573    | 36.89  | 1.71 | 67% |
| 51110  | LACTB2    |   | Y | Y |  |   |   | BC000878     | 20.69  | 1.71 | 67% |
| 90488  | C12orf23  |   |   |   |  |   |   | NM_152261    | 69.89  | 1.71 | 67% |
| 51081  | MRPS7     |   |   |   |  |   |   | NM_015971    | 93.92  | 1.71 | 67% |
| 27294  | DHDH      |   | Y | Y |  |   |   | NM_014475    | 29.69  | 1.72 | 67% |
| 58191  | CXCL16    |   |   |   |  |   |   | NM_022059    | 38.36  | 1.73 | 67% |
| 4134   | MAP4      |   |   |   |  |   |   | BC051843     | 71.33  | 1.73 | 67% |
| 27349  | MCAT      |   | Y | Y |  |   |   | BC042195     | 19.78  | 1.73 | 67% |
| 3646   | EIF3S6    |   |   |   |  |   | Y | BC005944     | 20.92  | 1.73 | 67% |
| 4258   | MGST2     |   |   |   |  |   |   | NM_002413    | 53.75  | 1.73 | 67% |
| 79823  | C2orf34   |   |   |   |  |   |   | BC029359     | 68.31  | 1.73 | 67% |
| 53343  | NUDT9     |   |   |   |  |   |   | NM_024047    | 20.36  | 1.73 | 67% |

|        |          |   |   |   |  |  |   |   |           |        |      |     |
|--------|----------|---|---|---|--|--|---|---|-----------|--------|------|-----|
| 10331  | B3GNT3   |   |   |   |  |  | Y |   | BC066876  | 53.69  | 1.74 | 67% |
| 84317  | CCDC115  |   |   |   |  |  |   |   | BC006429  | 16.92  | 1.74 | 67% |
| 29950  | SERTAD1  |   |   |   |  |  |   |   | BC002670  | 17.69  | 1.74 | 67% |
| 56475  | RPRM     |   |   |   |  |  |   |   | NM_019845 | 28.36  | 1.75 | 67% |
| 90293  | KLHL13   |   |   |   |  |  |   |   | NM_033495 | 41.25  | 1.75 | 67% |
| 11201  | POLI     |   |   |   |  |  |   |   | BC032662  | 23.11  | 1.75 | 67% |
| 83640  | FAM103A1 |   |   |   |  |  |   |   | NM_031452 | 41.50  | 1.75 | 67% |
| 51076  | CUTC     |   |   |   |  |  |   |   | BC021105  | 43.42  | 1.75 | 67% |
| 2067   | ERCC1    |   |   |   |  |  | Y |   | NM_001983 | 30.61  | 1.76 | 67% |
| 341032 | C11orf53 |   |   |   |  |  |   |   | NM_198498 | 20.72  | 1.76 | 67% |
| 5984   | RFC4     |   |   |   |  |  |   |   | NM_002916 | 28.50  | 1.76 | 67% |
| 57118  | CAMK1D   |   |   |   |  |  |   |   | NM_153498 | 64.75  | 1.77 | 67% |
| 83657  | DYNLRB2  |   |   |   |  |  |   |   | BC054892  | 108.28 | 1.77 | 67% |
| 1995   | ELAVL3   |   |   |   |  |  |   |   | BC014144  | 18.50  | 1.77 | 67% |
| 221443 | C6orf130 |   |   |   |  |  |   |   | NM_145063 | 169.06 | 1.77 | 67% |
| 89941  | RHOT2    |   |   |   |  |  |   |   | NM_138769 | 51.31  | 1.78 | 67% |
| 2739   | GLO1     |   |   |   |  |  |   |   | BC001741  | 76.17  | 1.78 | 67% |
| 6888   | TALDO1   |   |   |   |  |  |   |   | NM_006755 | 37.81  | 1.78 | 67% |
| 83607  | AMMECR1L |   |   |   |  |  |   |   | NM_031445 | 30.25  | 1.78 | 67% |
| 23564  | DDAH2    |   |   |   |  |  |   |   | NM_013974 | 49.97  | 1.78 | 67% |
| 113251 | LARP4    |   |   | Y |  |  |   |   | BC063479  | 44.86  | 1.78 | 67% |
| 114884 | OSBPL10  |   |   | Y |  |  |   |   | BC003168  | 60.06  | 1.78 | 67% |
| 148581 | UBE2U    |   |   |   |  |  |   |   | NM_152489 | 19.92  | 1.78 | 67% |
| 51256  | TBC1D7   |   |   |   |  |  |   |   | NM_016495 | 38.56  | 1.79 | 67% |
| 57396  | CLK4     |   | Y | Y |  |  |   |   | NM_020666 | 133.86 | 1.79 | 67% |
| 2185   | PTK2B    |   |   |   |  |  | Y |   | NM_004103 | 64.28  | 1.79 | 67% |
| 5606   | MAP2K3   |   |   |   |  |  |   |   | NM_002756 | 64.42  | 1.79 | 67% |
| 79415  | C17orf62 |   |   |   |  |  |   |   | BC003595  | 42.17  | 1.79 | 67% |
| 51313  | C4orf18  | Y |   |   |  |  |   | Y | NM_016613 | 30.58  | 1.80 | 67% |
| 29880  | ALG5     |   |   |   |  |  |   |   | NM_013338 | 23.67  | 1.80 | 67% |
| 9267   | PSCD1    |   |   |   |  |  |   |   | NM_004762 | 58.50  | 1.80 | 67% |
| 5579   | PRKCB1   |   |   |   |  |  | Y |   | NM_002738 | 92.75  | 1.80 | 67% |
| 2342   | FNTB     |   |   |   |  |  |   |   | NM_002028 | 30.50  | 1.81 | 67% |
| 27010  | TPK1     |   |   |   |  |  |   |   | BC068460  | 26.75  | 1.81 | 67% |
| 1106   | CHD2     |   |   |   |  |  |   |   | BC007347  | 104.19 | 1.81 | 67% |
| 2079   | ERH      |   |   |   |  |  |   |   | NM_004450 | 56.67  | 1.81 | 67% |
| 23603  | CORO1C   |   |   |   |  |  |   | Y | NM_014325 | 56.31  | 1.82 | 67% |
| 55664  | CDC37L1  |   |   |   |  |  |   |   | BC014133  | 27.06  | 1.82 | 67% |
| 89848  | FCHSD1   |   |   |   |  |  |   |   | BC047016  | 54.86  | 1.82 | 67% |
| 5438   | POLR2I   |   |   |   |  |  |   |   | NM_006233 | 27.89  | 1.82 | 67% |
| 338382 | RAB7B    |   |   |   |  |  |   |   | BC007382  | 80.69  | 1.83 | 67% |
| 91734  | IDI2     |   |   |   |  |  |   |   | NM_033261 | 39.33  | 1.83 | 67% |
| 118812 | C10orf83 |   |   | Y |  |  |   |   | NM_178832 | 138.53 | 1.83 | 67% |
| 64130  | LIN7B    |   |   |   |  |  |   |   | NM_022165 | 36.14  | 1.83 | 67% |
| 55303  | GIMAP4   | Y |   |   |  |  |   |   | NM_018326 | 49.89  | 1.83 | 67% |
| 1803   | DPP4     |   |   | Y |  |  |   |   | NM_001935 | 44.64  | 1.83 | 67% |
| 51079  | NDUFA13  |   |   |   |  |  |   |   | BC009189  | 46.03  | 1.83 | 67% |
| 648    | BMI1     |   |   |   |  |  |   |   | NM_005180 | 17.94  | 1.84 | 67% |
| 51329  | ARL6IP4  |   |   |   |  |  |   |   | NM_016638 | 28.67  | 1.84 | 67% |
| 2932   | GSK3B    |   |   |   |  |  |   |   | NM_002093 | 28.14  | 1.84 | 67% |
| 11171  | STRAP    |   |   |   |  |  |   |   | BC000162  | 21.58  | 1.84 | 67% |
| 54956  | PARP16   |   |   |   |  |  |   |   | BC031074  | 73.64  | 1.84 | 67% |

|        |           |   |   |   |  |   |   |           |        |      |     |
|--------|-----------|---|---|---|--|---|---|-----------|--------|------|-----|
| 9709   | HERPUD1   |   |   |   |  |   |   | NM_014685 | 19.14  | 1.84 | 67% |
| 2193   | FARSLA    |   |   |   |  |   |   | NM_004461 | 47.00  | 1.85 | 67% |
| 114818 | KLHL29    | Y |   |   |  |   |   | BC015667  | 39.25  | 1.85 | 67% |
| 113251 | LARP4     |   |   | Y |  |   |   | BC063479  | 73.31  | 1.85 | 67% |
| 4296   | MAP3K11   |   |   |   |  |   |   | NM_002419 | 176.78 | 1.85 | 67% |
| 51747  | CROP      |   |   |   |  |   |   | BC056409  | 92.78  | 1.85 | 67% |
| 6128   | RPL6      |   |   |   |  |   | Y | NM_000970 | 78.36  | 1.86 | 67% |
| 84153  | RNASEH2C  |   |   |   |  |   |   | NM_032193 | 27.06  | 1.86 | 67% |
| 57687  | KIAA1576  |   |   |   |  |   |   | BC033537  | 42.92  | 1.86 | 67% |
| 1021   | CDK6      | Y |   |   |  |   |   | NM_001259 | 50.92  | 1.86 | 67% |
| 5522   | PPP2R2C   |   |   |   |  |   | Y | BC032954  | 29.53  | 1.87 | 67% |
| 9949   | AMMECR1   |   |   |   |  |   |   | BC060813  | 183.03 | 1.87 | 67% |
| 4176   | MCM7      |   |   |   |  |   |   | BC009398  | 32.06  | 1.87 | 67% |
| 64928  | MRPL14    |   |   |   |  |   |   | NM_032111 | 29.06  | 1.87 | 67% |
| 84959  | STS-1     |   |   |   |  | Y | Y | NM_032873 | 44.17  | 1.88 | 67% |
| 27295  | PDLIM3    |   |   |   |  |   | Y | BC001017  | 24.78  | 1.88 | 67% |
| 55286  | C4orf19   |   |   |   |  |   |   | BC037906  | 57.64  | 1.88 | 67% |
| 4109   | MAGEA10   |   |   |   |  |   |   | NM_021048 | 19.33  | 1.88 | 67% |
| 10994  | ILVBL     |   |   |   |  |   |   | NM_176826 | 28.14  | 1.88 | 67% |
| 55285  | RBM41     |   |   |   |  |   |   | BC006986  | 25.00  | 1.88 | 67% |
| 8645   | KCNK5     |   |   |   |  |   |   | BC060793  | 37.47  | 1.88 | 67% |
| 2873   | GPS1      |   |   | Y |  |   |   | NM_212492 | 52.47  | 1.89 | 67% |
| 5601   | MAPK9     |   |   |   |  |   |   | BC032539  | 41.89  | 1.89 | 67% |
| 760    | CA2       |   |   | Y |  |   |   | NM_000067 | 18.58  | 1.89 | 67% |
| 128308 | MRPL55    |   |   |   |  |   |   | BC052806  | 72.19  | 1.89 | 67% |
| 11155  | LDB3      |   | Y | Y |  |   |   | BC010929  | 38.61  | 1.89 | 67% |
| 3190   | HNRPK     |   |   |   |  |   |   | NM_002140 | 117.33 | 1.89 | 67% |
| 377677 | CA13      | Y | Y |   |  |   |   | BC052602  | 28.44  | 1.90 | 67% |
| 5141   | PDE4A     |   |   |   |  |   |   | NM_006202 | 22.64  | 1.90 | 67% |
| 55669  | MFN1      |   |   |   |  |   |   | NM_033540 | 18.97  | 1.90 | 67% |
| 27445  | PCLO      |   |   |   |  |   |   | BC001304  | 27.28  | 1.90 | 67% |
| 55092  | TMEM51    |   |   |   |  |   |   | BC005177  | 26.50  | 1.90 | 67% |
| 84168  | ANTXR1    |   |   |   |  |   | Y | NM_018153 | 42.67  | 1.90 | 67% |
| 3050   | HBZ       | Y |   |   |  |   | Y | NM_005332 | 20.50  | 1.91 | 67% |
| 221302 | C6orf113  |   |   |   |  |   |   | BC016879  | 102.36 | 1.91 | 67% |
| 257203 | DSCR9     |   |   |   |  |   |   | BC029827  | 24.58  | 1.91 | 67% |
| 79805  | VASH2     |   |   |   |  |   | Y | NM_024749 | 165.06 | 1.92 | 67% |
| 10755  | GIPC1     |   |   |   |  |   |   | BC004226  | 24.44  | 1.92 | 67% |
| 5672   | PSG4      |   |   |   |  |   |   | BC008405  | 46.00  | 1.92 | 67% |
| 1528   | CYB5A     |   |   |   |  |   |   | BC015182  | 18.78  | 1.93 | 67% |
| 1983   | EIF5      | Y |   |   |  |   |   | BC032866  | 31.92  | 1.93 | 67% |
| 840    | CASP7     |   |   |   |  |   |   | BC015799  | 23.00  | 1.93 | 67% |
| 149563 | C1orf64   |   |   | Y |  |   |   | NM_178840 | 18.92  | 1.93 | 67% |
| 3956   | LGALS1    |   |   |   |  |   | Y | NM_002305 | 39.83  | 1.93 | 67% |
| 2054   | STX2      |   |   |   |  |   |   | NM_001980 | 65.97  | 1.93 | 67% |
| 11345  | GABARAPL2 |   |   |   |  |   |   | NM_007285 | 32.08  | 1.93 | 67% |
| 10884  | MRPS30    |   |   |   |  |   |   | BC002460  | 32.92  | 1.94 | 67% |
| 126119 | JOSD2     |   |   |   |  |   |   | NM_138334 | 47.17  | 1.94 | 67% |
| 2923   | PDIA3     |   |   |   |  |   |   | NM_005313 | 34.36  | 1.94 | 67% |
| 3028   | HSD17B10  |   |   |   |  |   |   | BC008708  | 45.56  | 1.94 | 67% |
| 9368   | SLC9A3R1  | Y | Y | Y |  |   |   | NM_004252 | 39.39  | 1.95 | 67% |
| 91608  | RASL10B   |   |   |   |  |   |   | BC041133  | 28.89  | 1.95 | 67% |

|        |          |   |   |   |  |   |   |  |           |        |      |     |
|--------|----------|---|---|---|--|---|---|--|-----------|--------|------|-----|
| 5599   | MAPK8    |   |   |   |  |   |   |  | NM_002750 | 40.64  | 1.95 | 67% |
| 9218   | VAPA     |   |   |   |  |   |   |  | NM_003574 | 28.75  | 1.95 | 67% |
| 5683   | PSMA2    |   |   |   |  |   |   |  | NM_002787 | 20.06  | 1.96 | 67% |
| 23105  | FSTL4    |   |   |   |  |   |   |  | BC024300  | 30.72  | 1.96 | 67% |
| 5289   | PIK3C3   |   |   |   |  |   |   |  | NM_002647 | 23.92  | 1.96 | 67% |
| 1459   | CSNK2A2  |   |   |   |  |   |   |  | NM_001896 | 83.14  | 1.96 | 67% |
| 4794   | NFKBIE   |   |   |   |  |   |   |  | BC011676  | 40.31  | 1.96 | 67% |
| 4151   | MB       | Y |   |   |  |   |   |  | NM_005368 | 60.61  | 1.97 | 67% |
| 84255  | SLC37A3  |   |   |   |  |   |   |  | BC046567  | 28.14  | 1.98 | 67% |
| 5723   | PSPH     |   |   |   |  |   |   |  | NM_004577 | 23.42  | 1.98 | 67% |
| 7010   | TEK      | Y |   |   |  |   |   |  | NM_000459 | 26.89  | 1.98 | 67% |
| 23421  | ITGB3BP  |   |   |   |  |   | Y |  | BC014385  | 27.00  | 1.98 | 67% |
| 2596   | GAP43    |   |   |   |  |   | Y |  | NM_002045 | 51.06  | 1.99 | 67% |
| 66005  | CHID1    |   |   |   |  |   |   |  | BC000001  | 16.00  | 1.99 | 67% |
| 158787 | RIBC1    |   |   |   |  |   |   |  | BC036767  | 39.75  | 1.99 | 67% |
| 55930  | MYO5C    |   |   |   |  |   |   |  | BC064841  | 45.86  | 1.99 | 67% |
| 7589   | ZSCAN21  |   |   |   |  |   |   |  | NM_145914 | 39.33  | 1.99 | 67% |
| 83879  | CDCA7    |   |   |   |  |   | Y |  | NM_145810 | 50.44  | 1.99 | 67% |
| 9087   | TMSB4Y   |   |   |   |  |   |   |  | NM_004202 | 24.58  | 1.99 | 67% |
| 5026   | P2RX5    |   |   |   |  |   |   |  | NM_002561 | 23.17  | 2.00 | 67% |
| 283229 | EFCAB4A  |   |   |   |  |   |   |  | BC033196  | 59.14  | 2.00 | 67% |
| 3963   | LGALS7   |   |   |   |  |   |   |  | NM_002307 | 16.25  | 2.00 | 67% |
| 9212   | AURKB    |   |   |   |  |   | Y |  | BC000442  | 67.94  | 2.00 | 67% |
| 2205   | FCER1A   | Y |   |   |  |   |   |  | NM_002001 | 25.83  | 2.01 | 67% |
| 7272   | TTK      |   |   |   |  |   | Y |  | NM_003318 | 96.39  | 2.01 | 67% |
| 56986  | DTWD1    |   |   |   |  | Y |   |  | NM_020234 | 104.75 | 2.01 | 67% |
| 7980   | TFPI2    |   |   |   |  |   |   |  | NM_006528 | 59.94  | 2.01 | 67% |
| 146223 | CMTM4    |   |   | Y |  |   |   |  | NM_178818 | 67.64  | 2.01 | 67% |
| 2869   | GRK5     | Y |   |   |  |   | Y |  | NM_005308 | 34.14  | 2.01 | 67% |
| 9321   | TRIP11   |   |   |   |  |   |   |  | BC002656  | 17.25  | 2.02 | 67% |
| 5568   | PRKACG   |   |   |   |  |   |   |  | NM_002732 | 19.44  | 2.02 | 67% |
| 55504  | TNFRSF19 |   |   | Y |  |   |   |  | NM_148957 | 26.33  | 2.02 | 67% |
| 1845   | DUSP3    |   |   | Y |  |   |   |  | NM_004090 | 69.75  | 2.02 | 67% |
| 9261   | MAPKAPK2 |   |   |   |  |   |   |  | NM_004759 | 154.86 | 2.03 | 67% |
| 10421  | CD2BP2   |   |   |   |  |   |   |  | NM_006110 | 81.33  | 2.03 | 67% |
| 51524  | TMEM138  |   |   |   |  |   |   |  | NM_016464 | 42.94  | 2.03 | 67% |
| 79188  | TMEM43   |   |   |   |  |   |   |  | BC011719  | 28.50  | 2.03 | 67% |
| 8724   | SNX3     |   |   |   |  |   |   |  | NM_003795 | 36.72  | 2.04 | 67% |
| 6135   | RPL11    |   |   |   |  |   | Y |  | NM_000975 | 19.08  | 2.04 | 67% |
| 2274   | FHL2     |   |   |   |  |   | Y |  | NM_001450 | 35.31  | 2.04 | 67% |
| 5606   | MAP2K3   |   |   |   |  |   |   |  | NM_002756 | 30.92  | 2.04 | 67% |
| 6198   | RPS6KB1  |   |   |   |  |   |   |  | BC053365  | 29.94  | 2.04 | 67% |
| 1266   | CNN3     |   |   |   |  |   |   |  | NM_001839 | 62.33  | 2.04 | 67% |
| 85458  | DIXDC1   |   |   |   |  |   | Y |  | BC033034  | 238.72 | 2.05 | 67% |
| 4869   | NPM1     |   |   |   |  |   |   |  | BC009623  | 47.14  | 2.05 | 67% |
| 8394   | PIP5K1A  |   |   |   |  |   |   |  | BC007833  | 24.22  | 2.05 | 67% |
| 51160  | VPS28    |   |   |   |  |   |   |  | NM_016208 | 18.83  | 2.05 | 67% |
| 83853  | ROPN1L   |   |   |   |  |   | Y |  | BC014607  | 18.86  | 2.05 | 67% |
| 51161  | C3orf18  |   |   |   |  |   |   |  | NM_016210 | 37.47  | 2.05 | 67% |
| 22797  | TFEC     |   | Y | Y |  |   |   |  | BC029891  | 22.81  | 2.06 | 67% |
| 11216  | AKAP10   |   |   |   |  |   |   |  | NM_007202 | 27.28  | 2.06 | 67% |
| 26508  | HEYL     |   |   |   |  |   |   |  | NM_014571 | 38.22  | 2.06 | 67% |

|        |           |   |   |   |  |   |  |              |        |      |     |
|--------|-----------|---|---|---|--|---|--|--------------|--------|------|-----|
| 3422   | IDI1      |   |   |   |  |   |  | NM_004508    | 24.56  | 2.06 | 67% |
| 10437  | IFI30     |   |   |   |  |   |  | NM_006332    | 28.89  | 2.06 | 67% |
| 10781  | ZNF266    |   |   |   |  |   |  | BC017407     | 39.33  | 2.06 | 67% |
| 1642   | DDB1      |   |   |   |  |   |  | BC011686     | 16.86  | 2.06 | 67% |
| 119504 | C10orf104 |   |   |   |  |   |  | NM_173473    | 31.92  | 2.06 | 67% |
| 6278   | S100A7    |   |   |   |  |   |  | NM_002963    | 57.56  | 2.07 | 67% |
| 57707  | KIAA1609  |   |   |   |  |   |  | BC060844     | 100.28 | 2.08 | 67% |
| 761    | CA3       |   |   |   |  |   |  | NM_005181    | 35.44  | 2.08 | 67% |
| 22836  | RHOBTB3   |   |   |   |  |   |  | NM_014899    | 22.33  | 2.08 | 67% |
| 26002  | MOXD1     |   |   |   |  | Y |  | BC018756     | 23.28  | 2.09 | 67% |
| 4716   | NDUFB10   |   |   |   |  |   |  | NM_004548    | 29.36  | 2.09 | 67% |
| 10469  | TIMM44    |   |   |   |  |   |  | NM_006351    | 54.08  | 2.09 | 67% |
| 4780   | NFE2L2    |   |   |   |  |   |  | NM_006164    | 61.03  | 2.09 | 67% |
| 113402 | SFT2D1    |   |   |   |  |   |  | NM_145169    | 30.17  | 2.09 | 67% |
| 10993  | SDS       |   |   |   |  |   |  | BC020750     | 57.11  | 2.09 | 67% |
| 57521  | KIAA1303  |   |   |   |  |   |  | BC064515     | 30.42  | 2.09 | 67% |
| 22858  | ICK       |   |   |   |  |   |  | NM_014920    | 22.31  | 2.10 | 67% |
| 9765   | ZFYVE16   |   |   |   |  |   |  | BC030808     | 271.67 | 2.10 | 67% |
| 5684   | PSMA3     |   |   |   |  |   |  | NM_002788    | 61.75  | 2.10 | 67% |
| 51652  | VPS24     |   |   |   |  |   |  | NM_016079    | 35.81  | 2.11 | 67% |
| 66037  | BOLL      |   |   |   |  | Y |  | NM_033030    | 33.47  | 2.11 | 67% |
| 27238  | GPKOW     |   |   |   |  |   |  | NM_015698    | 42.89  | 2.11 | 67% |
| 55139  | ANKZF1    |   |   |   |  |   |  | BC000238     | 64.53  | 2.11 | 67% |
| 126328 | NDUFA11   |   |   |   |  |   |  | NM_175614    | 32.69  | 2.11 | 67% |
| 1267   | CNP       |   |   |   |  |   |  | BC028040     | 187.06 | 2.12 | 67% |
| 10410  | IFITM3    |   |   |   |  |   |  | BC008417     | 28.64  | 2.12 | 67% |
| 2252   | FGF7      |   |   |   |  | Y |  | NM_002009    | 32.31  | 2.13 | 67% |
| 255877 | BCL6B     |   |   |   |  |   |  | BC059404     | 30.53  | 2.13 | 67% |
| 7170   | TPM3      |   |   |   |  |   |  | BC008407     | 28.31  | 2.13 | 67% |
| 10809  | STARD10   |   |   |   |  |   |  | BC007919     | 26.06  | 2.13 | 67% |
| 2625   | GATA3     |   |   |   |  | Y |  | BC006793     | 20.92  | 2.13 | 67% |
| 3276   | PRMT1     |   |   |   |  |   |  | BC019268     | 30.39  | 2.13 | 67% |
| 81790  | RNF170    |   |   |   |  |   |  | BC032393     | 50.06  | 2.14 | 67% |
| 51267  | CLEC1A    | Y |   |   |  |   |  | NM_016511    | 17.58  | 2.14 | 67% |
| 10879  | SMR3B     |   |   |   |  |   |  | NM_006685    | 31.75  | 2.14 | 67% |
| 51533  | PHF7      |   |   |   |  |   |  | NM_016483    | 94.89  | 2.15 | 67% |
| 24140  | FTSJ1     |   |   |   |  |   |  | NM_012280    | 72.36  | 2.15 | 67% |
| 51131  | PHF11     |   |   |   |  |   |  | BC017212     | 128.78 | 2.15 | 67% |
| 5201   | PFDN1     |   |   |   |  |   |  | NM_002622    | 37.03  | 2.15 | 67% |
| 6001   | RGS10     |   |   |   |  | Y |  | NM_001005339 | 16.17  | 2.16 | 67% |
| 84248  | FYTDD1    |   |   |   |  |   |  | BC035006     | 31.14  | 2.16 | 67% |
| 26984  | SEC22A    |   |   |   |  |   |  | NM_012430    | 27.50  | 2.16 | 67% |
| 80176  | SPSB1     |   |   |   |  |   |  | NM_025106    | 26.00  | 2.16 | 67% |
| 5901   | RAN       |   |   |   |  |   |  | NM_006325    | 19.69  | 2.16 | 67% |
| 56894  | AGPAT3    |   | Y | Y |  |   |  | BC004219     | 30.69  | 2.17 | 67% |
| 57456  | KIAA1143  |   |   |   |  |   |  | BC016790     | 128.64 | 2.17 | 67% |
| 2875   | GPT       |   | Y |   |  |   |  | NM_005309    | 81.92  | 2.17 | 67% |
| 4609   | MYC       |   |   |   |  | Y |  | BC000141     | 22.56  | 2.17 | 67% |
| 4188   | MDF1      |   |   |   |  | Y |  | NM_005586    | 13.97  | 2.17 | 67% |
| 148867 | SLC30A7   |   |   |   |  |   |  | NM_133496    | 43.53  | 2.17 | 67% |
| 3663   | IRF5      |   |   |   |  |   |  | NM_032643    | 29.78  | 2.17 | 67% |
| 810    | CALML3    |   | Y | Y |  |   |  | NM_005185    | 23.75  | 2.17 | 67% |



|        |          |   |   |   |  |  |   |   |           |        |      |     |
|--------|----------|---|---|---|--|--|---|---|-----------|--------|------|-----|
| 80010  | RMI1     |   |   |   |  |  |   |   | BC039999  | 22.28  | 2.19 | 67% |
| 55684  | C9orf86  |   |   |   |  |  |   |   | BC002945  | 16.42  | 2.19 | 67% |
| 285533 | RNF175   |   |   |   |  |  |   | Y | NM_173662 | 27.72  | 2.19 | 67% |
| 64769  | C1orf149 |   |   |   |  |  |   |   | NM_022756 | 20.92  | 2.19 | 67% |
| 1025   | CDK9     |   |   |   |  |  |   |   | BC001968  | 17.50  | 2.19 | 67% |
| 836    | CASP3    |   |   |   |  |  |   | Y | NM_004346 | 31.03  | 2.19 | 67% |
| 5547   | PRCP     |   |   |   |  |  |   |   | NM_005040 | 16.81  | 2.20 | 67% |
| 10762  | NUP50    |   |   |   |  |  |   |   | NM_007172 | 35.06  | 2.20 | 67% |
| 7169   | TPM2     |   |   |   |  |  |   | Y | BC011776  | 17.56  | 2.20 | 67% |
| 10295  | BCKDK    |   |   |   |  |  |   |   | BC007363  | 44.36  | 2.20 | 67% |
| 116541 | MRPL54   |   |   |   |  |  |   |   | NM_172251 | 24.64  | 2.21 | 67% |
| 93380  | TMEM32   |   |   |   |  |  |   |   | NM_173470 | 13.67  | 2.21 | 67% |
| 84154  | BXDC1    |   |   |   |  |  |   |   | BC035314  | 56.50  | 2.21 | 67% |
| 23001  | WDFY3    |   |   |   |  |  |   |   | NM_178585 | 19.58  | 2.21 | 67% |
| 9217   | VAPB     |   |   |   |  |  |   |   | NM_004738 | 24.64  | 2.22 | 67% |
| 5330   | PLCB2    |   |   |   |  |  | Y | Y | BC009009  | 20.08  | 2.22 | 67% |
| 81839  | VANGL1   |   |   |   |  |  |   |   | NM_138959 | 27.47  | 2.22 | 67% |
| 6256   | RXRA     |   |   |   |  |  |   |   | NM_002957 | 26.83  | 2.22 | 67% |
| 10928  | RALBP1   |   |   |   |  |  | Y |   | NM_006788 | 53.22  | 2.22 | 67% |
| 151188 | ARL6IP6  |   |   |   |  |  |   |   | NM_152522 | 34.17  | 2.23 | 67% |
| 2355   | FOSL2    |   |   |   |  |  | Y |   | NM_005253 | 99.03  | 2.23 | 67% |
| 1021   | CDK6     | Y |   |   |  |  |   |   | NM_001259 | 90.50  | 2.23 | 67% |
| 11040  | PIM2     |   |   |   |  |  |   | Y | BC018111  | 94.39  | 2.23 | 67% |
| 1445   | CSK      |   |   |   |  |  |   |   | NM_004383 | 204.53 | 2.24 | 67% |
| 1466   | CSRP2    |   |   |   |  |  |   |   | NM_001321 | 37.64  | 2.24 | 67% |
| 9448   | MAP4K4   |   |   |   |  |  |   |   | NM_004834 | 21.36  | 2.24 | 67% |
| 25973  | PARS2    |   |   |   |  |  |   |   | BC007956  | 59.64  | 2.25 | 67% |
| 80195  | C10orf57 |   |   |   |  |  |   |   | NM_025125 | 23.17  | 2.25 | 67% |
| 29914  | UBIAD1   |   |   |   |  |  |   |   | NM_013319 | 14.25  | 2.25 | 67% |
| 10072  | DPP3     |   |   |   |  |  |   |   | BC001446  | 12.78  | 2.25 | 67% |
| 25842  | ASF1A    |   |   |   |  |  |   |   | NM_014034 | 21.44  | 2.25 | 67% |
| 54903  | MKS1     |   |   |   |  |  |   |   | BC010061  | 28.61  | 2.25 | 67% |
| 51699  | VPS29    |   |   |   |  |  |   |   | BC032462  | 28.78  | 2.26 | 67% |
| 55821  | ALLC     |   | Y | Y |  |  |   |   | BC029652  | 24.25  | 2.26 | 67% |
| 57407  | NMRAL1   |   |   |   |  |  |   |   | NM_020677 | 54.11  | 2.26 | 67% |
| 112399 | EGLN3    |   |   |   |  |  |   | Y | NM_022073 | 23.56  | 2.26 | 67% |
| 8526   | DGKE     | Y |   |   |  |  |   |   | BC022297  | 11.28  | 2.26 | 67% |
| 55773  | TBC1D23  |   |   |   |  |  |   |   | BC020955  | 18.86  | 2.26 | 67% |
| 5550   | PREP     |   |   |   |  |  |   |   | BC030636  | 88.81  | 2.27 | 67% |
| 10874  | NMU      |   |   |   |  |  |   |   | NM_006681 | 43.81  | 2.27 | 67% |
| 2799   | GNS      |   |   |   |  |  |   |   | NM_002076 | 38.58  | 2.28 | 67% |
| 221458 | KIF6     |   |   |   |  |  |   | Y | NM_145027 | 37.31  | 2.28 | 67% |
| 8463   | TEAD2    |   |   |   |  |  |   |   | BC051301  | 20.78  | 2.28 | 67% |
| 115024 | NT5C3L   |   |   |   |  |  |   |   | NM_052935 | 29.94  | 2.29 | 67% |
| 53917  | RAB24    |   |   |   |  |  |   |   | BC021263  | 65.39  | 2.30 | 67% |
| 9156   | EXO1     |   |   |   |  |  |   | Y | NM_130398 | 149.83 | 2.30 | 67% |
| 2972   | BRF1     |   |   |   |  |  |   |   | BC016743  | 21.03  | 2.31 | 67% |
| 13     | AADAC    |   |   |   |  |  |   | Y | NM_001086 | 26.50  | 2.31 | 67% |
| 10286  | BCAS2    |   |   |   |  |  |   |   | NM_005872 | 22.03  | 2.31 | 67% |
| 1019   | CDK4     |   |   |   |  |  |   |   | NM_000075 | 61.31  | 2.31 | 67% |
| 8605   | PLA2G4C  | Y |   |   |  |  |   |   | BC017956  | 30.14  | 2.31 | 67% |
| 23633  | KPNA6    |   |   |   |  |  |   |   | NM_012316 | 30.92  | 2.31 | 67% |

|        |           |  |   |   |  |   |  |           |        |      |     |
|--------|-----------|--|---|---|--|---|--|-----------|--------|------|-----|
| 3939   | LDHA      |  |   |   |  |   |  | NM_005566 | 15.56  | 2.32 | 67% |
| 9649   | RALGPS1   |  |   |   |  |   |  | BC032372  | 53.97  | 2.32 | 67% |
| 220002 | CYBASC3   |  |   |   |  |   |  | NM_153611 | 23.58  | 2.32 | 67% |
| 9567   | GTPBP1    |  |   |   |  |   |  | NM_004286 | 23.22  | 2.33 | 67% |
| 22932  | POMZP3    |  |   |   |  |   |  | BC017101  | 30.08  | 2.33 | 67% |
| 7866   | IFRD2     |  |   |   |  |   |  | BC001327  | 38.53  | 2.33 | 67% |
| 54458  | PRR13     |  |   |   |  |   |  | NM_018457 | 39.56  | 2.34 | 67% |
| 6629   | SNRPB2    |  |   |   |  |   |  | NM_003092 | 33.47  | 2.34 | 67% |
| 1613   | DAPK3     |  |   |   |  |   |  | NM_001348 | 91.11  | 2.35 | 67% |
| 10013  | HDAC6     |  | Y | Y |  |   |  | BC011498  | 27.81  | 2.35 | 67% |
| 10671  | DCTN6     |  |   |   |  |   |  | NM_006571 | 28.89  | 2.35 | 67% |
| 55692  | LUC7L     |  |   |   |  |   |  | NM_018032 | 32.47  | 2.36 | 67% |
| 221336 | C6orf65   |  |   |   |  | Y |  | BC022988  | 59.39  | 2.36 | 67% |
| 57222  | ERGIC1    |  |   |   |  |   |  | BC012766  | 89.78  | 2.36 | 67% |
| 2874   | GPS2      |  |   |   |  |   |  | NM_004489 | 21.75  | 2.37 | 67% |
| 5720   | PSME1     |  |   |   |  |   |  | NM_006263 | 30.39  | 2.37 | 67% |
| 5271   | SERPINB8  |  |   |   |  | Y |  | BC034528  | 91.61  | 2.37 | 67% |
| 51440  | HPCAL4    |  | Y | Y |  |   |  | BC030827  | 23.67  | 2.37 | 67% |
| 2066   | ERBB4     |  | Y | Y |  |   |  | NM_005235 | 28.36  | 2.37 | 67% |
| 196441 | CCDC131   |  |   |   |  |   |  | NM_144982 | 82.11  | 2.38 | 67% |
| 64417  | C5orf28   |  |   |   |  | Y |  | NM_022483 | 12.36  | 2.38 | 67% |
| 6945   | MLX       |  |   |   |  |   |  | NM_198204 | 32.56  | 2.38 | 67% |
| 63940  | GPSM3     |  |   |   |  | Y |  | NM_022107 | 15.25  | 2.39 | 67% |
| 84072  | HORMAD1   |  |   |   |  | Y |  | NM_032132 | 20.17  | 2.39 | 67% |
| 4336   | MOBP      |  |   |   |  | Y |  | BC022471  | 18.56  | 2.39 | 67% |
| 963    | CD53      |  |   |   |  | Y |  | BC040693  | 11.00  | 2.39 | 67% |
| 10618  | TGOLN2    |  |   | Y |  |   |  | BC008461  | 33.58  | 2.39 | 67% |
| 51058  | ZNF691    |  |   |   |  |   |  | BC000157  | 22.53  | 2.40 | 67% |
| 79183  | C20orf121 |  |   |   |  |   |  | NM_024331 | 26.33  | 2.40 | 67% |
| 51703  | ACSL5     |  |   |   |  | Y |  | NM_016234 | 47.69  | 2.41 | 67% |
| 2277   | FIGF      |  |   |   |  | Y |  | NM_004469 | 16.33  | 2.41 | 67% |
| 79730  | NSUN7     |  |   |   |  |   |  | NM_024677 | 22.94  | 2.41 | 67% |
| 10617  | STAMBP    |  |   |   |  |   |  | NM_006463 | 20.42  | 2.41 | 67% |
| 30834  | ZNRD1     |  |   |   |  |   |  | NM_014596 | 41.58  | 2.41 | 67% |
| 27296  | C20orf10  |  |   |   |  |   |  | NM_014477 | 31.92  | 2.42 | 67% |
| 7450   | VWF       |  |   |   |  | Y |  | BC022258  | 27.64  | 2.42 | 67% |
| 1018   | CDK3      |  |   |   |  |   |  | NM_001258 | 39.00  | 2.42 | 67% |
| 55140  | ELP3      |  |   |   |  |   |  | NM_018091 | 17.89  | 2.42 | 67% |
| 167227 | DCP2      |  |   |   |  | Y |  | BC064593  | 191.19 | 2.43 | 67% |
| 1452   | CSNK1A1   |  |   |   |  |   |  | NM_001892 | 19.86  | 2.43 | 67% |
| 28970  | C11orf54  |  | Y | Y |  |   |  | BC007110  | 27.69  | 2.43 | 67% |
| 4704   | NDUFA9    |  |   |   |  |   |  | NM_005002 | 76.58  | 2.44 | 67% |
| 1747   | DLX3      |  |   |   |  |   |  | NM_005220 | 40.97  | 2.44 | 67% |
| 7465   | WEE1      |  |   |   |  | Y |  | NM_003390 | 373.36 | 2.44 | 67% |
| 10691  | GMEB1     |  |   |   |  |   |  | NM_024482 | 20.92  | 2.44 | 67% |
| 25928  | SOSTDC1   |  |   |   |  | Y |  | NM_015464 | 27.47  | 2.45 | 67% |
| 79133  | C20orf7   |  |   |   |  |   |  | BC005984  | 22.08  | 2.45 | 67% |
| 11033  | CENTA1    |  |   |   |  |   |  | NM_006869 | 25.69  | 2.45 | 67% |
| 11091  | WDR5      |  |   |   |  |   |  | NM_017588 | 177.64 | 2.45 | 67% |
| 29979  | UBQLN1    |  |   |   |  |   |  | NM_053067 | 33.72  | 2.46 | 67% |
| 4191   | MDH2      |  |   |   |  |   |  | BC001917  | 16.36  | 2.46 | 67% |
| 56911  | C21orf7   |  |   |   |  | Y |  | BC008567  | 39.50  | 2.46 | 67% |

|        |           |   |   |   |  |  |   |           |        |      |     |
|--------|-----------|---|---|---|--|--|---|-----------|--------|------|-----|
| 80700  | UBXD1     |   |   |   |  |  |   | BC007414  | 23.89  | 2.46 | 67% |
| 5685   | PSMA4     |   |   |   |  |  |   | NM_002789 | 28.94  | 2.46 | 67% |
| 29089  | UBE2T     |   |   |   |  |  | Y | NM_014176 | 56.83  | 2.47 | 67% |
| 51605  | CGI-09    |   |   |   |  |  |   | NM_015939 | 308.42 | 2.47 | 67% |
| 5064   | PALM      |   | Y | Y |  |  |   | BC032449  | 57.00  | 2.48 | 67% |
| 55520  | ELAC1     |   |   |   |  |  |   | NM_018696 | 14.17  | 2.49 | 67% |
| 57489  | ODF2L     |   |   |   |  |  |   | BC009779  | 22.86  | 2.50 | 67% |
| 7434   | VIPR2     |   |   |   |  |  |   | NM_003382 | 15.64  | 2.50 | 67% |
| 1910   | EDNRB     |   |   |   |  |  | Y | NM_000115 | 17.36  | 2.51 | 67% |
| 140706 | C20orf160 | Y |   |   |  |  |   | BC032455  | 9.03   | 2.52 | 67% |
| 9702   | CEP57     |   |   |   |  |  |   | BC039711  | 30.86  | 2.52 | 67% |
| 6302   | TSPAN31   |   |   |   |  |  |   | NM_005981 | 24.78  | 2.52 | 67% |
| 4286   | MITF      |   |   |   |  |  |   | BC026961  | 37.33  | 2.53 | 67% |
| 7586   | ZKSCAN1   |   |   |   |  |  |   | BC022378  | 17.22  | 2.53 | 67% |
| 57146  | TMEM159   |   |   |   |  |  |   | NM_020422 | 27.39  | 2.54 | 67% |
| 23532  | PRAME     |   |   |   |  |  |   | BC039731  | 22.92  | 2.54 | 67% |
| 10124  | ARL4A     |   |   |   |  |  |   | NM_005738 | 62.33  | 2.54 | 67% |
| 55668  | C14orf118 |   |   |   |  |  |   | BC058032  | 29.50  | 2.54 | 67% |
| 10006  | ABI1      |   |   |   |  |  |   | BC024254  | 55.69  | 2.54 | 67% |
| 1397   | CRIP2     |   |   |   |  |  |   | NM_001312 | 25.17  | 2.54 | 67% |
| 10254  | STAM2     |   |   |   |  |  | Y | BC028740  | 15.94  | 2.54 | 67% |
| 148738 | HFE2      |   |   |   |  |  |   | BC017926  | 21.97  | 2.55 | 67% |
| 23450  | SF3B3     |   |   |   |  |  |   | BC000463  | 58.42  | 2.55 | 67% |
| 84867  | PTPN5     |   |   |   |  |  |   | NM_032781 | 53.67  | 2.55 | 67% |
| 10614  | HEXIM1    |   |   |   |  |  |   | NM_006460 | 48.61  | 2.55 | 67% |
| 172    | AFG3L1    |   |   |   |  |  |   | BC021245  | 30.42  | 2.57 | 67% |
| 283337 | ZNF740    |   |   |   |  |  |   | BC053557  | 193.47 | 2.57 | 67% |
| 9054   | NFS1      |   |   | Y |  |  |   | NM_021100 | 26.25  | 2.57 | 67% |
| 11065  | UBE2C     |   |   |   |  |  | Y | NM_007019 | 28.72  | 2.57 | 67% |
| 6591   | SNAI2     |   |   |   |  |  |   | NM_003068 | 13.00  | 2.58 | 67% |
| 79672  | FN3KRP    |   |   |   |  |  |   | NM_024619 | 17.67  | 2.60 | 67% |
| 1123   | CHN1      |   |   |   |  |  | Y | BC011393  | 17.28  | 2.60 | 67% |
| 56063  | C1orf91   |   |   |   |  |  |   | BC004885  | 16.28  | 2.60 | 67% |
| 59342  | SCPEP1    |   |   |   |  |  |   | BC010078  | 15.58  | 2.60 | 67% |
| 54937  | SOHLH2    |   |   |   |  |  | Y | BC025383  | 24.67  | 2.60 | 67% |
| 213    | ALB       |   |   | Y |  |  |   | NM_000477 | 11.47  | 2.60 | 67% |
| 2665   | GDI2      |   |   |   |  |  |   | NM_001494 | 10.33  | 2.61 | 67% |
| 115727 | RASGRP4   |   |   |   |  |  | Y | NM_170603 | 15.78  | 2.61 | 67% |
| 23481  | PES1      |   |   |   |  |  |   | NM_014303 | 29.17  | 2.61 | 67% |
| 57696  | DDX55     |   |   |   |  |  |   | BC035911  | 20.94  | 2.61 | 67% |
| 5859   | QARS      |   |   |   |  |  |   | BC016634  | 38.11  | 2.63 | 67% |
| 3615   | IMPDH2    |   |   |   |  |  | Y | BC006124  | 26.06  | 2.63 | 67% |
| 51203  | NUSAP1    |   |   |   |  |  | Y | NM_018454 | 95.64  | 2.64 | 67% |
| 928    | CD9       |   |   |   |  |  |   | NM_001769 | 27.33  | 2.64 | 67% |
| 8798   | DYRK4     |   |   |   |  |  |   | NM_003845 | 26.33  | 2.65 | 67% |
| 404220 | C6orf201  |   | Y | Y |  |  |   | NM_206834 | 138.06 | 2.65 | 67% |
| 60685  | ZFAND3    |   |   |   |  |  |   | NM_021943 | 123.81 | 2.65 | 67% |
| 51031  | C17orf25  |   |   |   |  |  |   | BC015848  | 310.31 | 2.65 | 67% |
| 8609   | KLF7      | Y |   |   |  |  |   | BC012919  | 23.25  | 2.65 | 67% |
| 10578  | GNLY      | Y |   |   |  |  | Y | NM_006433 | 89.03  | 2.66 | 67% |
| 10134  | BCAP31    |   |   | Y |  |  |   | BC014323  | 15.75  | 2.66 | 67% |
| 83596  | BCL2L12   |   |   |   |  |  |   | BC007724  | 11.69  | 2.67 | 67% |

|        |           |   |   |   |  |   |   |           |        |      |     |
|--------|-----------|---|---|---|--|---|---|-----------|--------|------|-----|
| 3606   | IL18      |   |   |   |  |   |   | NM_001562 | 12.11  | 2.67 | 67% |
| 79081  | C11orf48  |   |   |   |  |   |   | NM_024099 | 30.92  | 2.68 | 67% |
| 83591  | THAP2     |   |   |   |  |   |   | NM_031435 | 33.25  | 2.68 | 67% |
| 10146  | G3BP1     |   |   |   |  |   |   | NM_198395 | 28.19  | 2.69 | 67% |
| 10001  | MED6      |   |   |   |  |   |   | BC004106  | 17.31  | 2.69 | 67% |
| 2647   | BLOC1S1   |   |   | Y |  |   |   | BC066340  | 14.92  | 2.70 | 67% |
| 3840   | KPNA4     |   |   |   |  |   |   | BC016754  | 12.97  | 2.70 | 67% |
| 54518  | APBB1IP   |   |   |   |  |   | Y | BC035636  | 93.47  | 2.71 | 67% |
| 51078  | THAP4     |   |   |   |  |   |   | BC000247  | 20.53  | 2.71 | 67% |
| 26060  | APPL1     |   |   |   |  |   |   | NM_012096 | 14.97  | 2.71 | 67% |
| 8576   | STK16     |   |   |   |  |   |   | NM_003691 | 99.44  | 2.71 | 67% |
| 57379  | AICDA     |   |   |   |  |   |   | NM_020661 | 54.31  | 2.73 | 67% |
| 3845   | KRAS      |   |   |   |  |   |   | BC013572  | 15.64  | 2.73 | 67% |
| 11069  | RAPGEF4   | Y |   |   |  |   |   | BC040183  | 18.08  | 2.73 | 67% |
| 135138 | PACRG     |   | Y |   |  |   |   | BC030642  | 29.33  | 2.74 | 67% |
| 5603   | MAPK13    |   |   |   |  | Y |   | NM_002754 | 21.92  | 2.74 | 67% |
| 63935  | C20orf67  |   |   |   |  |   |   | NM_022104 | 40.42  | 2.74 | 67% |
| 54664  | TMEM106B  |   |   |   |  |   |   | BC039741  | 32.06  | 2.75 | 67% |
| 7936   | RDBP      |   |   |   |  |   |   | NM_002904 | 92.53  | 2.75 | 67% |
| 5358   | PLS3      |   |   |   |  |   |   | NM_005032 | 16.72  | 2.76 | 67% |
| 79960  | PHF17     |   |   | Y |  |   |   | NM_024900 | 40.17  | 2.76 | 67% |
| 255762 | C16orf65  |   |   |   |  |   |   | NM_173806 | 13.06  | 2.76 | 67% |
| 6856   | SYPL1     |   |   |   |  |   |   | NM_006754 | 18.67  | 2.77 | 67% |
| 28989  | C9orf32   |   |   |   |  |   |   | BC001396  | 45.39  | 2.77 | 67% |
| 51527  | C14orf129 |   |   |   |  |   |   | BC004818  | 6.89   | 2.79 | 67% |
| 26262  | TSPAN17   |   |   |   |  |   |   | BC010405  | 27.81  | 2.79 | 67% |
| 26135  | SERBP1    |   |   |   |  |   |   | NM_015640 | 20.00  | 2.79 | 67% |
| 5717   | PSMD11    |   |   |   |  |   |   | NM_002815 | 27.14  | 2.80 | 67% |
| 90273  | CEACAM21  |   |   |   |  |   |   | BC012001  | 12.14  | 2.81 | 67% |
| 25926  | NOL11     |   |   |   |  |   |   | BC001726  | 26.69  | 2.81 | 67% |
| 4212   | MEIS2     |   |   |   |  |   |   | NM_170676 | 22.89  | 2.82 | 67% |
| 1407   | CRY1      |   |   |   |  |   |   | BC030519  | 12.03  | 2.82 | 67% |
| 2882   | GPX7      |   |   |   |  |   |   | NM_015696 | 17.06  | 2.84 | 67% |
| 10049  | DNAJB6    |   |   |   |  |   |   | BC000177  | 15.58  | 2.84 | 67% |
| 10551  | AGR2      |   |   |   |  |   | Y | NM_006408 | 42.53  | 2.86 | 67% |
| 54585  | LZTFL1    |   |   |   |  |   |   | NM_020347 | 26.78  | 2.86 | 67% |
| 4152   | MBD1      |   |   |   |  |   |   | BC033242  | 33.81  | 2.87 | 67% |
| 92747  | C20orf114 |   |   |   |  |   |   | BC008429  | 21.72  | 2.87 | 67% |
| 5554   | PRH1      |   |   |   |  |   |   | BC064553  | 206.25 | 2.87 | 67% |
| 6319   | SCD       |   |   |   |  |   | Y | BC005807  | 53.19  | 2.88 | 67% |
| 8036   | SHOC2     |   |   |   |  |   |   | NM_007373 | 28.11  | 2.88 | 67% |
| 6613   | SUMO2     |   |   |   |  |   |   | NM_006937 | 54.36  | 2.89 | 67% |
| 25953  | PNKD      |   |   |   |  |   |   | NM_015488 | 16.00  | 2.89 | 67% |
| 79736  | C17orf42  |   |   |   |  |   |   | BC009025  | 15.22  | 2.91 | 67% |
| 2990   | GUSB      |   | Y | Y |  |   |   | NM_000181 | 15.50  | 2.91 | 67% |
| 6414   | SEPP1     |   |   |   |  |   |   | BC046152  | 10.86  | 2.92 | 67% |
| 5805   | PTS       |   |   |   |  |   |   | NM_000317 | 27.00  | 2.96 | 67% |
| 6432   | SFRS7     |   |   |   |  |   |   | BC000997  | 24.36  | 2.97 | 67% |
| 80306  | MED28     |   |   |   |  |   |   | BC011936  | 17.06  | 2.98 | 67% |
| 2633   | GBP1      |   |   |   |  |   | Y | NM_002053 | 15.61  | 2.98 | 67% |
| 6160   | RPL31     |   |   |   |  |   | Y | NM_000993 | 139.28 | 2.99 | 67% |
| 23530  | NNT       |   |   | Y |  |   |   | BC032370  | 30.36  | 2.99 | 67% |

|        |           |   |   |   |  |   |   |           |        |      |     |
|--------|-----------|---|---|---|--|---|---|-----------|--------|------|-----|
| 55323  | LARP6     |   |   |   |  |   |   | NM_018357 | 15.61  | 3.00 | 67% |
| 6500   | SKP1A     |   |   |   |  |   |   | NM_170679 | 9.47   | 3.01 | 67% |
| 762    | CA4       |   | Y | Y |  |   |   | BC057792  | 9.86   | 3.01 | 67% |
| 23379  | KIAA0947  |   |   |   |  |   |   | BC004902  | 17.11  | 3.03 | 67% |
| 79810  | PTCD2     |   |   |   |  |   |   | NM_024754 | 25.81  | 3.05 | 67% |
| 158234 | RG9MTD3   | Y |   |   |  |   |   | BC057774  | 22.92  | 3.05 | 67% |
| 3598   | IL13RA2   | Y |   |   |  |   |   | BC020739  | 13.22  | 3.06 | 67% |
| 83543  | C9orf58   |   |   |   |  |   |   | BC021253  | 143.08 | 3.08 | 67% |
| 5315   | PKM2      |   |   |   |  |   |   | BC035198  | 52.72  | 3.08 | 67% |
| 84263  | HSDL2     |   |   |   |  |   |   | NM_032303 | 12.39  | 3.09 | 67% |
| 128486 | C20orf142 |   |   |   |  |   |   | BC029662  | 14.72  | 3.10 | 67% |
| 338692 | ANKRD13D  |   |   |   |  |   |   | BC044239  | 28.33  | 3.10 | 67% |
| 3838   | KPNA2     |   |   |   |  |   |   | BC053343  | 23.75  | 3.10 | 67% |
| 57410  | SCYL1     |   |   |   |  |   |   | BC009967  | 18.08  | 3.11 | 67% |
| 10555  | AGPAT2    |   |   |   |  |   |   | BC000026  | 18.14  | 3.12 | 67% |
| 131965 | METTL6    |   |   |   |  |   |   | NM_152396 | 20.39  | 3.13 | 67% |
| 2752   | GLUL      |   |   |   |  |   |   | BC031964  | 24.92  | 3.15 | 67% |
| 10084  | PQBP1     |   |   |   |  |   |   | NM_005710 | 11.28  | 3.15 | 67% |
| 2037   | EPB41L2   |   |   |   |  |   |   | BC034718  | 16.83  | 3.17 | 67% |
| 91543  | RSAD2     |   |   |   |  |   |   | BC017969  | 22.31  | 3.18 | 67% |
| 54514  | DDX4      |   |   |   |  |   |   | BC047455  | 46.97  | 3.20 | 67% |
| 2065   | ERBB3     |   | Y | Y |  | Y |   | BC002706  | 13.47  | 3.21 | 67% |
| 302    | ANXA2     |   |   |   |  | Y | Y | BC023990  | 28.42  | 3.21 | 67% |
| 5165   | PDK3      |   |   | Y |  |   |   | NM_005391 | 14.94  | 3.22 | 67% |
| 132851 | SPATA4    |   |   |   |  |   |   | BC029428  | 24.06  | 3.23 | 67% |
| 81855  | SFXN3     |   |   | Y |  |   |   | NM_030971 | 20.64  | 3.24 | 67% |
| 2997   | GYS1      |   |   |   |  |   |   | NM_002103 | 20.89  | 3.25 | 67% |
| 3801   | KIFC3     |   |   |   |  |   |   | NM_005550 | 74.25  | 3.26 | 67% |
| 79574  | EPS8L3    |   |   |   |  | Y |   | BC012926  | 26.31  | 3.26 | 67% |
| 9962   | SLC23A2   |   |   |   |  |   |   | BC013112  | 15.28  | 3.26 | 67% |
| 55778  | C14orf131 |   |   |   |  |   |   | BC006222  | 40.89  | 3.27 | 67% |
| 383    | ARG1      |   |   |   |  |   | Y | NM_000045 | 67.36  | 3.28 | 67% |
| 55589  | BMP2K     |   |   |   |  |   |   | NM_017593 | 13.28  | 3.28 | 67% |
| 57689  | LRRC4C    |   |   |   |  |   |   | NM_020929 | 32.69  | 3.28 | 67% |
| 9450   | LY86      |   |   |   |  |   | Y | NM_004271 | 14.39  | 3.29 | 67% |
| 2491   | CENPI     |   |   |   |  | Y | Y | BC012462  | 14.97  | 3.29 | 67% |
| 11020  | RABL4     |   |   |   |  |   |   | BC000566  | 9.92   | 3.31 | 67% |
| 11001  | SLC27A2   |   | Y | Y |  |   |   | BC057770  | 208.47 | 3.31 | 67% |
| 9125   | RQCD1     |   |   |   |  |   |   | BC007102  | 54.50  | 3.31 | 67% |
| 55117  | SLC6A15   |   |   |   |  |   | Y | BC022253  | 30.06  | 3.32 | 67% |
| 259282 | FAM44A    |   |   |   |  |   |   | BC016987  | 20.89  | 3.32 | 67% |
| 53405  | CLIC5     | Y | Y | Y |  |   |   | BC035968  | 12.00  | 3.33 | 67% |
| 11235  | PDCD10    |   |   |   |  |   |   | NM_007217 | 29.78  | 3.35 | 67% |
| 84908  | FLJ14668  |   |   |   |  |   |   | BC014975  | 26.81  | 3.35 | 67% |
| 10331  | B3GNT3    |   |   |   |  |   | Y | BC066876  | 17.61  | 3.36 | 67% |
| 140680 | C20orf96  |   |   |   |  |   |   | BC051762  | 25.31  | 3.38 | 67% |
| 157    | ADRBK2    | Y |   |   |  |   | Y | NM_005160 | 92.47  | 3.42 | 67% |
| 97     | ACYP1     |   |   |   |  |   |   | BC035568  | 22.53  | 3.44 | 67% |
| 63943  | FKBP1     |   |   |   |  |   |   | NM_022110 | 13.25  | 3.44 | 67% |
| 57180  | ACTR3B    |   |   |   |  |   |   | NM_020445 | 22.61  | 3.45 | 67% |
| 6789   | STK4      |   |   |   |  |   | Y | NM_006282 | 444.64 | 3.45 | 67% |
| 115677 | NOSTRIN   | Y |   |   |  |   |   | NM_052946 | 16.61  | 3.45 | 67% |

|        |           |  |   |   |  |  |   |           |        |      |     |
|--------|-----------|--|---|---|--|--|---|-----------|--------|------|-----|
| 6934   | TCF7L2    |  |   |   |  |  |   | BC032656  | 9.33   | 3.46 | 67% |
| 92691  | TMEM169   |  |   |   |  |  |   | NM_138390 | 15.58  | 3.47 | 67% |
| 7357   | UGCG      |  |   |   |  |  |   | NM_003358 | 14.47  | 3.47 | 67% |
| 26502  | NARF      |  |   |   |  |  | Y | BC016440  | 12.75  | 3.52 | 67% |
| 7341   | SUMO1     |  |   |   |  |  |   | NM_003352 | 216.17 | 3.53 | 67% |
| 7378   | UPP1      |  |   |   |  |  |   | BC047030  | 15.33  | 3.53 | 67% |
| 9885   | OSBPL2    |  |   |   |  |  |   | NM_144498 | 8.94   | 3.54 | 67% |
| 9686   | VGLL4     |  |   |   |  |  |   | NM_014667 | 20.14  | 3.58 | 67% |
| 84936  | ZFYVE19   |  |   |   |  |  |   | BC015738  | 17.33  | 3.59 | 67% |
| 93100  | NAPRT1    |  |   | Y |  |  |   | BC032466  | 6.86   | 3.60 | 67% |
| 653820 | LOC653820 |  |   |   |  |  | Y | BC046199  | 16.22  | 3.60 | 67% |
| 51016  | C14orf122 |  |   |   |  |  |   | NM_016049 | 17.31  | 3.63 | 67% |
| 10494  | STK25     |  |   |   |  |  |   | NM_006374 | 73.58  | 3.63 | 67% |
| 23046  | KIF21B    |  |   |   |  |  | Y | BC052964  | 10.89  | 3.64 | 67% |
| 54487  | DGCR8     |  |   |   |  |  |   | NM_022720 | 22.28  | 3.64 | 67% |
| 274    | BIN1      |  |   |   |  |  |   | BC004101  | 14.25  | 3.65 | 67% |
| 3937   | LCP2      |  |   |   |  |  | Y | NM_005565 | 17.00  | 3.66 | 67% |
| 54708  | Mar5      |  |   |   |  |  |   | NM_017824 | 16.72  | 3.67 | 67% |
| 7283   | TUBG1     |  |   |   |  |  |   | NM_001070 | 27.36  | 3.67 | 67% |
| 64419  | MTMR14    |  |   |   |  |  |   | BC035690  | 24.81  | 3.67 | 67% |
| 9522   | SCAMP1    |  |   |   |  |  |   | NM_004866 | 18.58  | 3.83 | 67% |
| 7091   | TLE4      |  |   |   |  |  | Y | BC059405  | 74.67  | 3.83 | 67% |
| 5866   | RAB3IL1   |  |   | Y |  |  |   | NM_013401 | 42.33  | 3.85 | 67% |
| 54504  | CPVL      |  |   |   |  |  |   | NM_031311 | 17.86  | 3.85 | 67% |
| 1456   | CSNK1G3   |  |   |   |  |  |   | NM_004384 | 63.03  | 3.88 | 67% |
| 55038  | CDCA4     |  |   |   |  |  |   | BC025263  | 13.08  | 3.90 | 67% |
| 51329  | ARL6IP4   |  |   |   |  |  |   | NM_016638 | 85.72  | 3.90 | 67% |
| 64220  | STRA6     |  |   | Y |  |  | Y | NM_022369 | 23.31  | 3.90 | 67% |
| 8293   | SERF1A    |  |   |   |  |  |   | BC021174  | 16.64  | 3.97 | 67% |
| 26270  | FBXO6     |  |   |   |  |  |   | NM_018438 | 15.31  | 4.02 | 67% |
| 6520   | SLC3A2    |  | Y | Y |  |  |   | NM_002394 | 13.47  | 4.04 | 67% |
| 2170   | FABP3     |  | Y | Y |  |  |   | NM_004102 | 324.50 | 4.12 | 67% |
| 2932   | GSK3B     |  |   |   |  |  |   | NM_002093 | 17.78  | 4.14 | 67% |
| 27347  | STK39     |  |   |   |  |  | Y | NM_013233 | 32.22  | 4.17 | 67% |
| 950    | SCARB2    |  |   |   |  |  |   | NM_005506 | 22.75  | 4.19 | 67% |
| 253980 | KCTD13    |  |   |   |  |  |   | NM_178863 | 7.17   | 4.19 | 67% |
| 161247 | LOC161247 |  |   |   |  |  |   | BC042179  | 13.39  | 4.31 | 67% |
| 3385   | ICAM3     |  |   |   |  |  |   | BC058903  | 21.67  | 4.31 | 67% |
| 4116   | MAGOH     |  |   |   |  |  |   | NM_002370 | 12.19  | 4.33 | 67% |
| 6945   | MLX       |  |   |   |  |  |   | NM_198204 | 5.72   | 4.34 | 67% |
| 57464  | FAM40B    |  | Y | Y |  |  |   | BC019064  | 16.69  | 4.37 | 67% |
| 6434   | SFRS10    |  |   |   |  |  |   | NM_004593 | 13.00  | 4.37 | 67% |
| 54978  | C2orf18   |  |   | Y |  |  |   | NM_017877 | 15.42  | 4.38 | 67% |
| 369    | ARAF      |  |   |   |  |  |   | BC007514  | 34.89  | 4.39 | 67% |
| 55281  | TMEM140   |  |   |   |  |  |   | BC020942  | 9.11   | 4.39 | 67% |
| 51588  | PIAS4     |  |   |   |  |  |   | BC010047  | 15.00  | 4.41 | 67% |
| 51458  | RHCG      |  |   | Y |  |  |   | NM_016321 | 16.14  | 4.45 | 67% |
| 11257  | TP53AP1   |  |   |   |  |  |   | NM_007233 | 19.86  | 4.56 | 67% |
| 51390  | AIG1      |  |   | Y |  |  |   | BC025278  | 8.39   | 4.57 | 67% |
| 7167   | TPI1      |  |   |   |  |  |   | BC017917  | 40.92  | 4.60 | 67% |
| 381    | ARF5      |  |   |   |  |  |   | NM_001662 | 8.31   | 4.60 | 67% |
| 9045   | RPL14     |  |   |   |  |  | Y | BC009294  | 15.03  | 4.63 | 67% |

|        |          |   |   |   |   |  |   |           |       |       |     |
|--------|----------|---|---|---|---|--|---|-----------|-------|-------|-----|
| 832    | CAPZB    |   |   |   |   |  |   | BC008095  | 8.86  | 4.65  | 67% |
| 79848  | CSPP1    |   |   | Y |   |  |   | NM_024790 | 23.75 | 4.72  | 67% |
| 85026  | C9orf37  |   |   |   |   |  | Y | BC011781  | 14.39 | 4.74  | 67% |
| 55752  | Sep11    | Y |   |   |   |  |   | NM_018243 | 27.50 | 4.77  | 67% |
| 348487 | C1orf117 | Y | Y | Y |   |  |   | NM_182623 | 22.72 | 4.82  | 67% |
| 8476   | CDC42BPA | Y |   |   |   |  |   | NM_003607 | 48.19 | 4.86  | 67% |
| 23213  | SULF1    | Y |   |   |   |  | Y | BC012997  | 69.31 | 4.86  | 67% |
| 11336  | EXOC3    |   |   |   |   |  | Y | BC001511  | 6.86  | 4.94  | 67% |
| 5478   | PPIA     |   |   |   |   |  |   | BC005982  | 21.53 | 4.94  | 67% |
| 5347   | PLK1     |   |   |   |   |  | Y | NM_005030 | 7.94  | 4.97  | 67% |
| 5296   | PIK3R2   |   |   |   |   |  |   | BC014170  | 15.61 | 4.98  | 67% |
| 83989  | C5orf21  |   | Y |   |   |  |   | NM_032042 | 13.72 | 5.07  | 67% |
| 80233  | C17orf70 |   |   |   |   |  |   | NM_025161 | 10.28 | 5.10  | 67% |
| 6224   | RPS20    |   |   |   |   |  | Y | NM_001023 | 37.47 | 5.11  | 67% |
| 80184  | CEP290   |   |   |   |   |  |   | BC008641  | 8.11  | 5.21  | 67% |
| 1396   | CRIP1    |   |   |   |   |  |   | NM_001311 | 19.97 | 5.30  | 67% |
| 8644   | AKR1C3   |   |   |   |   |  | Y | NM_003739 | 4.64  | 5.33  | 67% |
| 2625   | GATA3    |   |   |   |   |  | Y | BC006793  | 13.08 | 5.49  | 67% |
| 965    | CD58     |   |   |   |   |  |   | BC005930  | 11.25 | 5.62  | 67% |
| 25939  | SAMHD1   |   |   |   |   |  | Y | BC036450  | 8.06  | 5.65  | 67% |
| 81611  | ANP32E   |   |   |   |   |  |   | NM_030920 | 14.78 | 5.67  | 67% |
| 3003   | GZMK     |   |   |   |   |  | Y | NM_002104 | 15.42 | 5.74  | 67% |
| 3704   | ITPA     |   |   |   |   |  |   | NM_033453 | 8.72  | 5.84  | 67% |
| 5095   | PCCA     |   |   |   |   |  |   | NM_000282 | 7.28  | 5.87  | 67% |
| 9839   | ZEB2     |   |   |   |   |  | Y | BC060819  | 12.08 | 5.97  | 67% |
| 58155  | PTBP2    |   |   |   |   |  |   | BC016582  | 10.69 | 6.00  | 67% |
| 10949  | HNRPA0   |   |   |   |   |  |   | NM_006805 | 6.53  | 6.04  | 67% |
| 80146  | UXS1     |   |   |   |   |  |   | BC009819  | 11.78 | 6.07  | 67% |
| 399669 | MGC35402 |   |   |   |   |  |   | BC046449  | 10.22 | 6.10  | 67% |
| 246330 | PELI3    |   |   |   |   |  |   | BC021256  | 12.72 | 6.11  | 67% |
| 114879 | OSBPL5   |   |   |   |   |  |   | BC032646  | 13.19 | 6.20  | 67% |
| 51274  | KLF3     |   |   |   |   |  |   | BC051687  | 10.92 | 6.45  | 67% |
| 3208   | HPCA     |   |   | Y |   |  |   | NM_002143 | 10.11 | 6.54  | 67% |
| 25873  | RPL36    |   |   |   |   |  |   | NM_015414 | 29.89 | 6.65  | 67% |
| 25901  | CCDC28A  |   |   |   |   |  |   | BC000758  | 9.44  | 6.83  | 67% |
| 9024   | BRSK2    |   |   |   |   |  |   | BC024291  | 20.78 | 6.88  | 67% |
| 116113 | FOXP4    |   |   |   |   |  |   | BC052803  | 11.00 | 6.95  | 67% |
| 23029  | RBM34    |   |   |   |   |  |   | NM_015014 | 17.64 | 7.31  | 67% |
| 9540   | TP53I3   |   |   |   |   |  |   | NM_004881 | 24.19 | 7.43  | 67% |
| 10573  | MRPL28   |   |   |   |   |  |   | BC000507  | 14.86 | 7.72  | 67% |
| 4642   | MYO1D    |   |   |   |   |  |   | BC030602  | 5.86  | 7.76  | 67% |
| 7289   | TULP3    |   |   |   |   |  |   | BC032587  | 11.75 | 7.80  | 67% |
| 219670 | C10orf63 |   |   |   |   |  |   | NM_145010 | 8.92  | 8.01  | 67% |
| 6457   | SH3GL3   |   |   |   | Y |  | Y | BC042864  | 12.42 | 8.35  | 67% |
| 5468   | PPARG    |   |   |   |   |  | Y | NM_015869 | 6.50  | 8.40  | 67% |
| 7181   | NR2C1    |   |   |   |   |  |   | BC040141  | 8.47  | 8.45  | 67% |
| 10591  | C6orf108 |   | Y | Y |   |  |   | NM_006443 | 14.89 | 8.47  | 67% |
| 10549  | PRDX4    |   |   |   |   |  |   | NM_006406 | 5.58  | 8.50  | 67% |
| 79171  | MGC10433 |   |   |   |   |  |   | BC031682  | 23.08 | 8.59  | 67% |
| 2976   | GTF3C2   |   |   |   |   |  |   | BC020981  | 21.86 | 8.65  | 67% |
| 57727  | NCOA5    |   |   |   |   |  |   | BC056872  | 6.78  | 9.27  | 67% |
| 9045   | RPL14    |   |   |   |   |  | Y | BC009294  | 8.56  | 10.23 | 67% |

|        |          |   |   |   |  |   |   |           |        |         |     |
|--------|----------|---|---|---|--|---|---|-----------|--------|---------|-----|
| 7538   | ZFP36    |   |   |   |  |   |   | NM_003407 | 4.42   | 10.83   | 67% |
| 23187  | PHLDB1   |   |   |   |  | Y |   | BC013031  | 8.14   | 10.89   | 67% |
| 3171   | FOXA3    |   |   |   |  | Y |   | NM_004497 | 12.78  | 11.46   | 67% |
| 218    | ALDH3A1  |   |   |   |  |   | Y | BC008892  | 5.58   | 11.96   | 67% |
| 149499 | C1orf92  |   |   |   |  |   |   | BC033790  | 15.14  | 12.12   | 67% |
| 2207   | FCER1G   |   |   |   |  |   | Y | BC033872  | 9.03   | 12.39   | 67% |
| 5092   | PCBD1    |   |   |   |  |   |   | NM_000281 | 4.25   | 13.43   | 67% |
| 11266  | DUSP12   |   |   |   |  |   |   | NM_007240 | 15.75  | 14.40   | 67% |
| 6988   | TCTA     |   |   |   |  |   |   | NM_022171 | 3.81   | 14.41   | 67% |
| 23623  | RUSC1    |   |   |   |  |   |   | BC001045  | 4.00   | 15.00   | 67% |
| 64073  | C19orf33 |   |   |   |  |   | Y | BC060319  | 4.94   | 17.91   | 67% |
| 81542  | TXNDC1   |   |   |   |  |   |   | NM_030755 | 2.72   | 18.31   | 67% |
| 55246  | CCDC25   |   |   |   |  |   |   | NM_018246 | 1.81   | 21.82   | 67% |
| 5824   | PEX19    |   |   |   |  |   |   | NM_002857 | 3.42   | 26.15   | 67% |
| 79596  | C13orf7  |   |   |   |  |   |   | NM_024546 | 2.22   | 40.12   | 67% |
| 85397  | RGS8     |   |   |   |  |   |   | NM_033345 | 0.53   | 130.07  | 67% |
| 4023   | LPL      |   |   |   |  |   |   | BC011353  | 0.08   | 897.97  | 67% |
| 2131   | EXT1     |   |   |   |  |   |   | BC001174  | -0.31  | -398.28 | 61% |
| 6541   | SLC7A1   |   |   |   |  | Y |   | NM_003045 | -0.31  | -295.32 | 61% |
| 3600   | IL15     |   |   |   |  |   |   | NM_000585 | -1.00  | -138.60 | 61% |
| 219541 | MED19    |   |   |   |  |   |   | NM_153450 | -0.58  | -124.70 | 61% |
| 137695 | TMEM68   |   |   |   |  |   |   | BC020835  | -1.50  | -78.43  | 61% |
| 7555   | CNBP     |   |   |   |  |   |   | BC000288  | -2.94  | -72.82  | 61% |
| 537    | ATP6AP1  |   |   |   |  |   |   | NM_001183 | -2.89  | -53.23  | 61% |
| 866    | SERPINA6 |   |   |   |  |   |   | BC056259  | -1.50  | -42.80  | 61% |
| 4696   | NDUFA3   |   |   |   |  |   |   | NM_004542 | -1.72  | -36.50  | 61% |
| 1476   | CSTB     |   |   |   |  |   |   | NM_000100 | -1.47  | -33.86  | 61% |
| 6337   | SCNN1A   |   |   |   |  |   |   | BC062613  | -3.14  | -31.66  | 61% |
| 655    | BMP7     | Y |   |   |  |   |   | BC004248  | -2.03  | -29.63  | 61% |
| 79719  | FLJ11506 |   |   |   |  |   |   | BC058886  | -4.69  | -29.00  | 61% |
| 755    | C21orf2  |   |   |   |  |   |   | BC031300  | -7.42  | -28.69  | 61% |
| 54769  | DIRAS2   |   |   |   |  |   |   | NM_017594 | -2.69  | -25.93  | 61% |
| 2644   | GCHFR    |   | Y |   |  |   |   | NM_005258 | -3.08  | -24.09  | 61% |
| 10618  | TGOLN2   |   | Y |   |  |   |   | BC008461  | -15.17 | -22.07  | 61% |
| 158399 | ZNF483   |   |   |   |  | Y |   | BC065738  | -8.42  | -18.78  | 61% |
| 4752   | NEK3     |   |   |   |  |   |   | NM_002498 | -27.28 | -18.49  | 61% |
| 7317   | UBE1     |   |   |   |  |   |   | NM_003334 | -8.75  | -18.20  | 61% |
| 8976   | WASL     |   |   |   |  |   |   | BC052955  | -13.44 | -16.43  | 61% |
| 27013  | C2orf24  |   |   |   |  |   |   | NM_015680 | -6.00  | -15.34  | 61% |
| 8087   | FXR1     |   |   |   |  |   |   | BC028983  | -6.44  | -13.94  | 61% |
| 10817  | FRS3     |   |   |   |  |   |   | NM_006653 | -8.86  | -12.02  | 61% |
| 10827  | C5orf3   |   |   |   |  |   |   | BC011414  | -16.19 | -11.01  | 61% |
| 9787   | DLG7     |   |   |   |  | Y | Y | BC016276  | -31.61 | -10.74  | 61% |
| 10190  | TXNDC9   |   |   |   |  |   |   | BC024223  | -8.83  | -9.99   | 61% |
| 51593  | ARS2     |   |   |   |  |   |   | BC000082  | -11.03 | -9.72   | 61% |
| 7525   | YES1     |   |   |   |  |   |   | NM_005433 | -24.17 | -9.02   | 61% |
| 9266   | PSCD2    |   |   |   |  |   |   | BC038713  | -24.61 | -8.63   | 61% |
| 4232   | MEST     |   |   |   |  |   | Y | NM_002402 | -21.69 | -7.81   | 61% |
| 5345   | SERPINF2 |   | Y | Y |  |   |   | BC031592  | -15.86 | -6.85   | 61% |
| 9910   | RABGAP1L |   |   |   |  |   |   | BC012094  | -44.17 | -6.10   | 61% |
| 23639  | LRRC6    |   |   |   |  |   |   | NM_012472 | -30.81 | -5.81   | 61% |
| 10078  | TSSC4    |   |   |   |  |   |   | BC050616  | -86.53 | -5.66   | 61% |



|        |           |   |   |   |  |   |   |  |              |         |       |     |
|--------|-----------|---|---|---|--|---|---|--|--------------|---------|-------|-----|
| 57149  | LYRM1     |   |   |   |  |   |   |  | NM_020424    | -58.28  | -5.62 | 61% |
| 9071   | CLDN10    |   |   |   |  |   |   |  | NM_006984    | -31.83  | -5.35 | 61% |
| 4709   | NDUFB3    |   |   |   |  |   |   |  | NM_002491    | -39.14  | -4.92 | 61% |
| 3113   | HLA-DPA1  |   |   |   |  |   |   |  | BC009956     | -74.39  | -4.78 | 61% |
| 54014  | BRWD1     |   |   |   |  |   |   |  | NM_001007246 | -38.94  | -4.47 | 61% |
| 84266  | ALKBH7    |   |   |   |  |   |   |  | NM_032306    | -29.03  | -4.30 | 61% |
| 79090  | TRAPPC6A  |   |   |   |  |   |   |  | BC001907     | -197.39 | -4.29 | 61% |
| 1068   | CETN1     |   |   |   |  |   |   |  | NM_004066    | -95.97  | -3.94 | 61% |
| 673    | BRAF      |   |   |   |  |   |   |  | NM_004333    | 157.64  | 1.37  | 61% |
| 27065  | D4S234E   |   | Y | Y |  |   |   |  | NM_014392    | 39.42   | 1.40  | 61% |
| 128637 | TBC1D20   |   |   |   |  |   |   |  | NM_144628    | 71.11   | 1.45  | 61% |
| 2049   | EPHB3     |   |   |   |  |   |   |  | NM_004443    | 63.97   | 1.45  | 61% |
| 10881  | ACTL7A    |   |   |   |  | Y |   |  | NM_006687    | 43.06   | 1.49  | 61% |
| 2947   | GSTM3     |   |   |   |  |   |   |  | BC008790     | 36.00   | 1.52  | 61% |
| 5771   | PTPN2     |   |   |   |  |   |   |  | NM_080423    | 41.89   | 1.53  | 61% |
| 89978  | ATPBD4    |   |   |   |  |   |   |  | NM_080650    | 33.28   | 1.55  | 61% |
| 283507 | LOC283507 |   |   |   |  |   |   |  | BC020814     | 31.97   | 1.58  | 61% |
| 3574   | IL7       |   |   |   |  |   |   |  | NM_000880    | 33.03   | 1.58  | 61% |
| 26301  | GBGT1     |   |   |   |  |   |   |  | BC032499     | 53.72   | 1.59  | 61% |
| 7265   | TTC1      |   |   |   |  |   |   |  | BC000942     | 42.17   | 1.60  | 61% |
| 208    | AKT2      |   |   |   |  | Y |   |  | NM_001626    | 149.03  | 1.60  | 61% |
| 92949  | ADAMTSL1  |   |   |   |  |   | Y |  | BC030262     | 40.72   | 1.60  | 61% |
| 2335   | FN1       |   |   |   |  |   | Y |  | BC005858     | 285.14  | 1.60  | 61% |
| 29066  | ZC3H7A    |   |   |   |  |   |   |  | BC012575     | 100.94  | 1.61  | 61% |
| 10658  | CUGBP1    |   |   |   |  |   |   |  | BC031079     | 42.36   | 1.62  | 61% |
| 64760  | RAI16     |   |   |   |  |   |   |  | BC012865     | 43.00   | 1.62  | 61% |
| 8721   | EDF1      |   |   |   |  |   |   |  | NM_003792    | 30.39   | 1.63  | 61% |
| 140545 | RNF32     |   |   |   |  |   |   |  | BC028120     | 52.56   | 1.63  | 61% |
| 4209   | MEF2D     |   |   |   |  |   |   |  | BC054520     | 56.69   | 1.63  | 61% |
| 57817  | HAMP      |   |   |   |  |   | Y |  | NM_021175    | 36.83   | 1.63  | 61% |
| 10244  | RABEPK    |   |   |   |  |   |   |  | BC047023     | 53.67   | 1.66  | 61% |
| 57107  | PDSS2     |   |   | Y |  |   |   |  | NM_020381    | 84.19   | 1.66  | 61% |
| 6602   | SMARCD1   |   |   |   |  |   |   |  | BC009368     | 40.72   | 1.66  | 61% |
| 8807   | IL18RAP   |   |   |   |  |   |   |  | NM_003853    | 28.89   | 1.67  | 61% |
| 54947  | AYTL1     |   |   |   |  |   |   |  | NM_017839    | 49.75   | 1.68  | 61% |
| 4005   | LMO2      | Y |   |   |  |   |   |  | NM_005574    | 38.33   | 1.69  | 61% |
| 79828  | METTL8    |   |   |   |  |   |   |  | NM_024770    | 50.28   | 1.69  | 61% |
| 80896  | NPL       |   | Y | Y |  |   |   |  | BC058003     | 23.69   | 1.70  | 61% |
| 90693  | CCDC126   |   |   |   |  |   |   |  | NM_138771    | 102.67  | 1.70  | 61% |
| 9144   | SYNGR2    |   |   |   |  |   |   |  | NM_004710    | 24.97   | 1.72  | 61% |
| 9409   | PEX16     |   |   |   |  |   |   |  | NM_004813    | 33.25   | 1.72  | 61% |
| 2213   | FCGR2B    |   |   |   |  |   | Y |  | NM_004001    | 30.31   | 1.72  | 61% |
| 79571  | GCC1      |   |   |   |  |   |   |  | BC008902     | 41.94   | 1.74  | 61% |
| 3189   | HNRPH3    |   |   |   |  |   |   |  | NM_021644    | 40.08   | 1.74  | 61% |
| 6419   | SETMAR    |   |   |   |  |   |   |  | BC011635     | 31.08   | 1.75  | 61% |
| 9322   | TRIP10    |   |   |   |  |   |   |  | NM_004240    | 46.39   | 1.75  | 61% |
| 23339  | VPS39     |   |   |   |  |   |   |  | NM_015289    | 24.83   | 1.75  | 61% |
| 79068  | FTO       |   |   |   |  |   |   |  | BC001284     | 28.94   | 1.76  | 61% |
| 9167   | COX7A2L   |   |   |   |  |   |   |  | NM_004718    | 23.72   | 1.76  | 61% |
| 6733   | SRPK2     |   |   |   |  |   |   |  | NM_182692    | 45.39   | 1.76  | 61% |
| 9404   | LPXN      |   |   |   |  |   | Y |  | NM_004811    | 38.58   | 1.76  | 61% |
| 153562 | MARVELD2  |   |   |   |  | Y |   |  | BC033689     | 31.86   | 1.78  | 61% |

|        |          |   |   |   |   |  |   |  |              |        |      |     |
|--------|----------|---|---|---|---|--|---|--|--------------|--------|------|-----|
| 6888   | TALDO1   |   |   |   |   |  |   |  | NM_006755    | 32.06  | 1.79 | 61% |
| 144715 | RAD9B    |   |   |   |   |  |   |  | BC068031     | 47.64  | 1.80 | 61% |
| 55228  | FLJ10781 |   |   |   |   |  |   |  | BC051688     | 48.61  | 1.80 | 61% |
| 4599   | MX1      |   | Y | Y |   |  |   |  | NM_002462    | 53.08  | 1.80 | 61% |
| 51629  | SLC25A39 |   |   |   |   |  |   |  | NM_016016    | 29.14  | 1.81 | 61% |
| 220972 | Mar8     |   |   |   |   |  |   |  | NM_145021    | 34.42  | 1.81 | 61% |
| 1200   | TPP1     |   |   |   |   |  |   |  | BC014863     | 26.39  | 1.81 | 61% |
| 6788   | STK3     |   |   |   |   |  |   |  | NM_006281    | 26.81  | 1.81 | 61% |
| 622    | BDH1     |   |   |   |   |  |   |  | NM_004051    | 22.89  | 1.81 | 61% |
| 9576   | SPAG6    |   |   |   |   |  |   |  | BC030585     | 25.03  | 1.81 | 61% |
| 5687   | PSMA6    |   |   |   |   |  |   |  | NM_002791    | 20.03  | 1.82 | 61% |
| 54946  | SLC41A3  |   |   |   |   |  |   |  | NM_001008485 | 33.50  | 1.82 | 61% |
| 80228  | TMEM142B |   |   |   |   |  |   |  | NM_032831    | 39.56  | 1.82 | 61% |
| 5217   | PFN2     |   |   |   |   |  |   |  | BC018049     | 30.89  | 1.83 | 61% |
| 116135 | LRRRC3B  |   |   |   |   |  | Y |  | BC040656     | 93.75  | 1.83 | 61% |
| 11017  | RY1      |   |   |   |   |  |   |  | NM_006857    | 33.53  | 1.83 | 61% |
| 54681  | PH-4     |   |   |   |   |  |   |  | NM_177938    | 19.67  | 1.83 | 61% |
| 79056  | PRRG4    |   |   |   | Y |  |   |  | NM_024081    | 42.69  | 1.84 | 61% |
| 5570   | PKIB     |   |   | Y |   |  | Y |  | NM_181795    | 38.72  | 1.84 | 61% |
| 8618   | CADPS    |   |   |   |   |  | Y |  | BC015754     | 38.28  | 1.84 | 61% |
| 51506  | UFC1     |   |   |   |   |  |   |  | BC005187     | 24.33  | 1.84 | 61% |
| 51194  | IPO11    |   |   |   |   |  |   |  | NM_016338    | 21.39  | 1.84 | 61% |
| 23646  | PLD3     |   |   |   |   |  |   |  | BC036327     | 72.03  | 1.85 | 61% |
| 55072  | RNF31    |   |   |   |   |  |   |  | BC017376     | 39.58  | 1.85 | 61% |
| 11212  | PROSC    |   |   |   |   |  |   |  | NM_007198    | 35.69  | 1.86 | 61% |
| 493753 | MGC52110 |   |   |   |   |  |   |  | BC047722     | 80.39  | 1.87 | 61% |
| 93974  | ATPIF1   |   |   |   |   |  |   |  | NM_178191    | 26.00  | 1.87 | 61% |
| 7329   | UBE2I    |   |   |   |   |  |   |  | NM_003345    | 37.72  | 1.87 | 61% |
| 150160 | CESK1    |   |   |   |   |  |   |  | NM_014406    | 41.22  | 1.87 | 61% |
| 105    | ADARB2   |   |   |   |   |  |   |  | BC047443     | 47.69  | 1.87 | 61% |
| 64976  | MRPL40   |   |   |   |   |  |   |  | NM_003776    | 42.33  | 1.87 | 61% |
| 1164   | CKS2     |   |   |   |   |  |   |  | NM_001827    | 55.75  | 1.87 | 61% |
| 80851  | SH3BP5L  |   |   |   |   |  |   |  | NM_030645    | 52.81  | 1.87 | 61% |
| 55466  | DNAJA4   |   |   |   |   |  | Y |  | BC031044     | 31.31  | 1.87 | 61% |
| 79618  | HMBOX1   | Y |   |   |   |  |   |  | BC009259     | 35.39  | 1.88 | 61% |
| 84942  | WDR73    |   |   |   |   |  |   |  | BC063392     | 60.83  | 1.88 | 61% |
| 51338  | MS4A4A   |   |   |   |   |  | Y |  | NM_148975    | 55.75  | 1.88 | 61% |
| 140732 | SPAG4L   |   |   |   |   |  |   |  | NM_080675    | 27.39  | 1.88 | 61% |
| 2876   | GPX1     |   |   |   |   |  |   |  | BC000742     | 29.86  | 1.88 | 61% |
| 2959   | GTF2B    |   |   |   |   |  |   |  | BC020597     | 20.72  | 1.89 | 61% |
| 10328  | COX4NB   |   |   |   |   |  |   |  | NM_006067    | 42.14  | 1.90 | 61% |
| 144193 | AMDHD1   |   | Y | Y |   |  |   |  | NM_152435    | 50.58  | 1.90 | 61% |
| 8522   | GAS7     |   |   |   |   |  |   |  | BC001152     | 25.69  | 1.90 | 61% |
| 4354   | MPP1     |   |   |   |   |  |   |  | NM_002436    | 182.36 | 1.91 | 61% |
| 83890  | SPATA9   |   |   |   |   |  |   |  | BC047333     | 34.39  | 1.91 | 61% |
| 10573  | MRPL28   |   |   |   |   |  |   |  | BC000507     | 30.42  | 1.91 | 61% |
| 1856   | DVL2     |   |   |   |   |  |   |  | NM_004422    | 25.81  | 1.91 | 61% |
| 26470  | SEZ6L2   | Y |   |   |   |  |   |  | BC000567     | 30.44  | 1.92 | 61% |
| 705    | BYSL     |   |   |   |   |  | Y |  | BC007340     | 66.28  | 1.92 | 61% |
| 2173   | FABP7    |   |   |   |   |  | Y |  | NM_001446    | 68.72  | 1.92 | 61% |
| 2921   | CXCL3    |   |   |   |   |  |   |  | BC016308     | 30.22  | 1.93 | 61% |
| 4686   | NCBP1    |   |   |   |   |  |   |  | NM_002486    | 18.94  | 1.93 | 61% |

|        |          |   |   |   |  |   |   |           |        |      |     |
|--------|----------|---|---|---|--|---|---|-----------|--------|------|-----|
| 84129  | ACAD11   |   |   | Y |  |   |   | NM_032169 | 24.06  | 1.93 | 61% |
| 9410   | WDR57    |   |   |   |  |   |   | BC001494  | 35.89  | 1.93 | 61% |
| 10087  | COL4A3BP |   |   |   |  |   |   | NM_031361 | 22.39  | 1.93 | 61% |
| 92346  | C1orf105 |   |   |   |  |   |   | NM_139240 | 43.25  | 1.94 | 61% |
| 29887  | SNX10    |   |   |   |  |   | Y | NM_013322 | 71.72  | 1.94 | 61% |
| 79763  | ISOC2    |   | Y | Y |  |   |   | BC017344  | 45.08  | 1.94 | 61% |
| 28954  | REM1     |   |   |   |  |   |   | NM_014012 | 108.64 | 1.94 | 61% |
| 8573   | CASK     |   |   |   |  |   |   | NM_003688 | 46.44  | 1.95 | 61% |
| 8407   | TAGLN2   |   |   |   |  |   |   | BC002616  | 34.86  | 1.95 | 61% |
| 51074  | APIP     |   |   |   |  |   |   | BC009077  | 73.61  | 1.95 | 61% |
| 219833 | C11orf45 |   |   |   |  |   |   | NM_145013 | 25.39  | 1.96 | 61% |
| 1938   | EEF2     |   |   |   |  |   |   | NM_001961 | 37.72  | 1.96 | 61% |
| 8674   | VAMP4    |   |   |   |  |   |   | BC005974  | 33.61  | 1.96 | 61% |
| 140465 | MYL6B    |   |   |   |  |   |   | NM_002475 | 26.31  | 1.96 | 61% |
| 83546  | RTBDN    |   |   |   |  |   |   | NM_031429 | 21.92  | 1.97 | 61% |
| 4184   | SMCP     |   |   |   |  |   |   | NM_030663 | 20.53  | 1.97 | 61% |
| 8548   | BLZF1    |   |   |   |  |   |   | NM_003666 | 37.28  | 1.97 | 61% |
| 259    | AMBP     |   |   | Y |  |   |   | NM_001633 | 24.19  | 1.97 | 61% |
| 1849   | DUSP7    |   |   |   |  |   |   | BC019107  | 21.39  | 1.97 | 61% |
| 793    | CALB1    |   | Y | Y |  |   |   | NM_004929 | 32.69  | 1.97 | 61% |
| 1073   | CFL2     |   |   |   |  |   | Y | NM_021914 | 28.14  | 1.97 | 61% |
| 7276   | TTR      | Y |   | Y |  |   |   | NM_000371 | 39.69  | 1.98 | 61% |
| 9522   | SCAMP1   |   |   |   |  |   |   | NM_004866 | 35.44  | 1.98 | 61% |
| 9315   | C5orf13  |   |   | Y |  |   |   | NM_004772 | 57.69  | 1.98 | 61% |
| 4521   | NUDT1    |   |   |   |  |   | Y | NM_198949 | 36.75  | 1.99 | 61% |
| 9592   | IER2     |   |   |   |  | Y |   | NM_004907 | 21.83  | 1.99 | 61% |
| 9246   | UBE2L6   |   |   |   |  |   |   | NM_004223 | 19.39  | 1.99 | 61% |
| 116225 | ZMYND19  |   |   |   |  |   |   | NM_138462 | 12.89  | 1.99 | 61% |
| 55609  | SUHW3    |   |   |   |  |   |   | NM_017666 | 14.75  | 2.00 | 61% |
| 81932  | HDHD3    |   |   |   |  |   |   | NM_031219 | 23.61  | 2.00 | 61% |
| 23609  | MKRN2    |   |   |   |  |   |   | BC015715  | 43.47  | 2.01 | 61% |
| 7035   | TFPI     |   |   |   |  |   |   | BC015514  | 34.33  | 2.01 | 61% |
| 1647   | GADD45A  |   |   |   |  |   |   | NM_001924 | 24.94  | 2.01 | 61% |
| 91942  | NDUFA12L |   |   |   |  |   |   | NM_174889 | 14.06  | 2.02 | 61% |
| 55691  | FRMD4A   |   |   |   |  |   |   | BC018891  | 26.03  | 2.02 | 61% |
| 11117  | EMILIN1  |   |   |   |  |   |   | BC007530  | 39.03  | 2.03 | 61% |
| 9554   | SEC22B   |   |   |   |  |   |   | NM_004892 | 22.14  | 2.03 | 61% |
| 219844 | HYLS1    |   |   | Y |  |   |   | BC015047  | 53.75  | 2.04 | 61% |
| 84923  | FAM104A  |   |   |   |  |   |   | NM_032837 | 50.97  | 2.04 | 61% |
| 26284  | ERAL1    |   |   |   |  |   |   | NM_005702 | 17.11  | 2.04 | 61% |
| 998    | CDC42    |   |   |   |  |   |   | NM_001791 | 20.47  | 2.04 | 61% |
| 9452   | ITM2A    |   |   |   |  |   |   | NM_004867 | 40.42  | 2.05 | 61% |
| 54973  | CPSF3L   |   |   |   |  |   |   | NM_017871 | 29.61  | 2.05 | 61% |
| 92715  | WDR85    |   |   |   |  |   |   | BC040173  | 47.31  | 2.05 | 61% |
| 5359   | PLSCR1   |   |   |   |  |   | Y | NM_021105 | 29.94  | 2.05 | 61% |
| 10066  | SCAMP2   |   |   |   |  |   | Y | NM_005697 | 22.67  | 2.06 | 61% |
| 11200  | CHEK2    |   |   |   |  |   |   | BC004207  | 44.19  | 2.06 | 61% |
| 2332   | FMR1     |   |   |   |  |   |   | BC038998  | 17.69  | 2.06 | 61% |
| 51626  | DYNC2LI1 |   |   |   |  |   |   | BC006969  | 56.33  | 2.06 | 61% |
| 63948  | DMRTB1   |   |   |   |  |   |   | BC029566  | 60.50  | 2.06 | 61% |
| 414    | ARSD     |   |   |   |  |   |   | BC020229  | 29.72  | 2.07 | 61% |
| 23475  | QPRT     |   |   | Y |  |   |   | BC010033  | 55.78  | 2.07 | 61% |

|        |          |   |  |   |  |   |  |     |           |        |      |     |
|--------|----------|---|--|---|--|---|--|-----|-----------|--------|------|-----|
| 144423 | GLT1D1   |   |  |   |  |   |  |     | BC043528  | 37.78  | 2.07 | 61% |
| 3159   | HMGA1    |   |  |   |  |   |  |     | NM_145899 | 12.06  | 2.07 | 61% |
| 81607  | PVRL4    |   |  |   |  |   |  | Y   | BC010423  | 16.69  | 2.07 | 61% |
| 23554  | TSPAN12  |   |  |   |  |   |  | Y   | BC031265  | 29.67  | 2.07 | 61% |
| 828    | CAPS     |   |  |   |  |   |  |     | NM_080590 | 43.06  | 2.07 | 61% |
| 116540 | MRPL53   |   |  |   |  |   |  |     | NM_053050 | 28.78  | 2.07 | 61% |
| 1408   | CRY2     |   |  |   |  |   |  |     | NM_021117 | 107.28 | 2.07 | 61% |
| 85415  | RHPN2    |   |  |   |  |   |  |     | NM_033103 | 29.00  | 2.08 | 61% |
| 23172  | KIAA0157 |   |  |   |  |   |  |     | NM_032182 | 22.78  | 2.08 | 61% |
| 79874  | RABEP2   |   |  |   |  |   |  |     | BC058900  | 41.44  | 2.08 | 61% |
| 54868  | TMEM104  |   |  |   |  |   |  |     | BC037278  | 26.36  | 2.08 | 61% |
| 51561  | IL23A    |   |  |   |  |   |  |     | NM_016584 | 78.64  | 2.08 | 61% |
| 6793   | STK10    |   |  |   |  |   |  |     | NM_005990 | 29.25  | 2.09 | 61% |
| 79871  | C1orf82  |   |  |   |  |   |  |     | BC039014  | 15.14  | 2.09 | 61% |
| 50808  | AK3      |   |  |   |  |   |  |     | NM_016282 | 20.69  | 2.09 | 61% |
| 10806  | SDCCAG8  |   |  |   |  |   |  |     | BC032454  | 66.44  | 2.10 | 61% |
| 4063   | LY9      |   |  |   |  |   |  | Y   | BC064485  | 24.39  | 2.10 | 61% |
| 55924  | C1orf183 |   |  |   |  |   |  |     | NM_019099 | 39.42  | 2.10 | 61% |
| 51646  | YPEL5    |   |  |   |  |   |  |     | NM_016061 | 21.78  | 2.10 | 61% |
| 9454   | HOMER3   |   |  |   |  |   |  |     | NM_004838 | 26.17  | 2.10 | 61% |
| 224    | ALDH3A2  |   |  | Y |  |   |  |     | BC002430  | 21.44  | 2.11 | 61% |
| 2707   | GJB3     |   |  |   |  |   |  | Y Y | NM_024009 | 21.42  | 2.11 | 61% |
| 5638   | PRRG1    |   |  |   |  | Y |  |     | BC060833  | 24.36  | 2.11 | 61% |
| 7052   | TGM2     | Y |  |   |  |   |  |     | BC003551  | 48.61  | 2.11 | 61% |
| 90326  | THAP3    |   |  |   |  | Y |  |     | BC022081  | 28.69  | 2.11 | 61% |
| 8569   | MKNK1    |   |  |   |  |   |  |     | BC002755  | 100.33 | 2.12 | 61% |
| 9141   | PDCD5    |   |  |   |  |   |  |     | NM_004708 | 110.47 | 2.12 | 61% |
| 92715  | WDR85    |   |  |   |  |   |  |     | BC040173  | 25.11  | 2.12 | 61% |
| 10298  | PAK4     |   |  |   |  |   |  |     | NM_005884 | 32.64  | 2.12 | 61% |
| 4899   | NRF1     |   |  |   |  |   |  |     | NM_005011 | 157.94 | 2.12 | 61% |
| 64407  | RGS18    |   |  |   |  |   |  |     | NM_130782 | 25.42  | 2.13 | 61% |
| 253782 | LASS6    | Y |  |   |  |   |  |     | BC030800  | 30.50  | 2.13 | 61% |
| 93099  | DMKN     |   |  |   |  |   |  |     | NM_033317 | 27.81  | 2.13 | 61% |
| 5029   | P2RY2    |   |  |   |  |   |  |     | BC028135  | 19.25  | 2.13 | 61% |
| 2108   | ETFA     |   |  | Y |  |   |  |     | NM_000126 | 32.17  | 2.13 | 61% |
| 386618 | KCTD4    |   |  |   |  |   |  |     | BC018063  | 23.67  | 2.13 | 61% |
| 57795  | FAM5B    |   |  |   |  |   |  |     | NM_021165 | 36.42  | 2.13 | 61% |
| 84264  | HAGHL    |   |  |   |  |   |  |     | BC015008  | 48.72  | 2.13 | 61% |
| 8601   | RGS20    |   |  |   |  |   |  |     | NM_003702 | 40.81  | 2.13 | 61% |
| 221150 | C13orf3  |   |  |   |  |   |  | Y   | BC048988  | 32.17  | 2.14 | 61% |
| 6252   | RTN1     |   |  |   |  |   |  |     | NM_206852 | 14.58  | 2.14 | 61% |
| 83983  | TSSK6    |   |  |   |  |   |  |     | NM_032037 | 25.69  | 2.14 | 61% |
| 1358   | CPA2     |   |  |   |  |   |  |     | BC007009  | 42.17  | 2.14 | 61% |
| 4713   | NDUFB7   |   |  |   |  |   |  |     | NM_004146 | 35.28  | 2.15 | 61% |
| 2242   | FES      |   |  |   |  |   |  |     | NM_002005 | 24.22  | 2.15 | 61% |
| 55502  | HES6     |   |  |   |  |   |  |     | NM_018645 | 12.33  | 2.15 | 61% |
| 3658   | IREB2    |   |  |   |  |   |  |     | BC017880  | 25.39  | 2.16 | 61% |
| 8674   | VAMP4    |   |  |   |  |   |  |     | BC005974  | 20.00  | 2.16 | 61% |
| 7051   | TGM1     |   |  |   |  |   |  |     | NM_000359 | 15.53  | 2.16 | 61% |
| 5585   | PKN1     |   |  |   |  |   |  |     | NM_002741 | 49.83  | 2.16 | 61% |
| 9440   | CRSP6    |   |  |   |  |   |  |     | BC021101  | 17.36  | 2.17 | 61% |
| 3903   | LAIR1    |   |  |   |  |   |  | Y   | NM_002287 | 17.64  | 2.18 | 61% |

|        |          |   |   |   |  |   |   |  |           |       |      |     |
|--------|----------|---|---|---|--|---|---|--|-----------|-------|------|-----|
| 10043  | TOM1     |   |   |   |  |   |   |  | BC046151  | 48.97 | 2.18 | 61% |
| 9235   | IL32     |   | Y | Y |  |   |   |  | BC018782  | 12.39 | 2.18 | 61% |
| 9946   | CRYZL1   |   |   |   |  |   |   |  | BC013155  | 17.56 | 2.18 | 61% |
| 25876  | C2orf28  |   |   |   |  |   |   |  | NM_015417 | 13.47 | 2.18 | 61% |
| 5970   | RELA     |   |   |   |  |   |   |  | BC011603  | 40.42 | 2.19 | 61% |
| 79022  | TMEM106C |   |   |   |  |   |   |  | NM_024056 | 21.08 | 2.19 | 61% |
| 8886   | DDX18    |   |   |   |  |   |   |  | BC003360  | 85.03 | 2.19 | 61% |
| 57504  | MTA3     |   |   |   |  |   |   |  | NM_020744 | 33.36 | 2.19 | 61% |
| 586    | BCAT1    |   |   |   |  | Y | Y |  | BC033864  | 34.08 | 2.19 | 61% |
| 57118  | CAMK1D   |   |   |   |  |   |   |  | NM_153498 | 17.81 | 2.20 | 61% |
| 83595  | SOX7     | Y |   |   |  |   |   |  | NM_031439 | 26.03 | 2.20 | 61% |
| 124583 | CANT1    | Y |   |   |  |   |   |  | NM_138793 | 14.69 | 2.20 | 61% |
| 83873  | GPR61    |   |   |   |  |   |   |  | NM_031936 | 16.39 | 2.20 | 61% |
| 6041   | RNASEL   |   |   |   |  |   |   |  | NM_021133 | 46.00 | 2.21 | 61% |
| 3419   | IDH3A    |   |   |   |  |   |   |  | NM_005530 | 20.28 | 2.21 | 61% |
| 83661  | MS4A8B   | Y |   |   |  |   | Y |  | BC022895  | 36.39 | 2.21 | 61% |
| 427    | ASAH1    |   |   |   |  |   |   |  | NM_177924 | 36.28 | 2.21 | 61% |
| 54581  | SCAND2   |   |   |   |  |   |   |  | NM_033640 | 24.00 | 2.21 | 61% |
| 117145 | THEM4    |   |   |   |  |   |   |  | NM_053055 | 32.33 | 2.21 | 61% |
| 2512   | FTL      |   | Y | Y |  |   |   |  | BC013928  | 36.17 | 2.21 | 61% |
| 65992  | C2orf116 |   |   |   |  |   |   |  | BC007957  | 26.08 | 2.21 | 61% |
| 10237  | SLC35B1  |   |   |   |  |   |   |  | BC011888  | 29.75 | 2.21 | 61% |
| 79752  | ZFAND1   |   |   |   |  |   |   |  | BC022251  | 23.83 | 2.21 | 61% |
| 5362   | PLXNA2   | Y |   |   |  |   |   |  | BC032125  | 29.39 | 2.21 | 61% |
| 29080  | CCDC59   |   |   |   |  |   |   |  | BC020647  | 67.17 | 2.21 | 61% |
| 5152   | PDE9A    |   |   |   |  |   |   |  | BC009047  | 48.56 | 2.22 | 61% |
| 8908   | GYG2     |   |   |   |  |   |   |  | BC023152  | 41.58 | 2.22 | 61% |
| 3782   | KCNN3    |   |   |   |  | Y |   |  | BC042147  | 32.22 | 2.22 | 61% |
| 6445   | SGCG     |   |   |   |  |   | Y |  | NM_000231 | 23.11 | 2.22 | 61% |
| 1025   | CDK9     |   |   |   |  |   |   |  | BC001968  | 14.64 | 2.23 | 61% |
| 122953 | JDP2     |   |   |   |  |   | Y |  | NM_130469 | 20.50 | 2.23 | 61% |
| 8621   | CDC2L5   |   |   |   |  |   |   |  | BC001274  | 18.53 | 2.24 | 61% |
| 79370  | BCL2L14  |   |   |   |  |   |   |  | NM_138722 | 42.33 | 2.24 | 61% |
| 57152  | SLURP1   |   |   |   |  |   |   |  | NM_020427 | 26.67 | 2.24 | 61% |
| 58488  | PCTP     |   |   |   |  |   |   |  | BC012084  | 20.08 | 2.24 | 61% |
| 4351   | MPI      |   |   |   |  |   |   |  | NM_002435 | 13.86 | 2.24 | 61% |
| 5304   | PIP      |   |   |   |  |   |   |  | NM_002652 | 36.39 | 2.24 | 61% |
| 1432   | MAPK14   |   |   |   |  |   |   |  | NM_139012 | 16.81 | 2.25 | 61% |
| 58478  | ENOPH1   |   |   |   |  |   |   |  | NM_021204 | 9.25  | 2.25 | 61% |
| 140691 | TRIM69   |   |   |   |  |   |   |  | BC047945  | 36.08 | 2.25 | 61% |
| 388962 | BOLA3    |   |   |   |  |   |   |  | BC042036  | 44.67 | 2.25 | 61% |
| 57415  | C3orf14  |   |   |   |  | Y | Y |  | NM_020685 | 20.25 | 2.25 | 61% |
| 85021  | REPS1    |   |   |   |  |   |   |  | BC021211  | 43.58 | 2.25 | 61% |
| 79053  | ALG8     |   |   |   |  |   |   |  | NM_024079 | 18.42 | 2.26 | 61% |
| 65083  | NOL6     |   |   |   |  |   |   |  | BC008298  | 20.25 | 2.26 | 61% |
| 10318  | TNIP1    |   |   |   |  |   |   |  | BC014008  | 37.39 | 2.27 | 61% |
| 1783   | DYNC1LI2 |   |   |   |  |   |   |  | BC025959  | 11.39 | 2.27 | 61% |
| 54149  | C21orf91 |   |   |   |  |   |   |  | BC015468  | 27.53 | 2.27 | 61% |
| 170261 | ZCCHC12  |   |   |   |  |   | Y |  | BC036572  | 26.25 | 2.27 | 61% |
| 3122   | HLA-DRA  |   |   |   |  |   |   |  | BC032350  | 16.00 | 2.27 | 61% |
| 84722  | PSRC1    |   |   |   |  |   |   |  | NM_032636 | 39.67 | 2.28 | 61% |
| 6318   | SERPINB4 |   |   |   |  |   |   |  | NM_002974 | 26.58 | 2.28 | 61% |

|        |          |   |   |   |  |   |   |   |           |        |      |     |
|--------|----------|---|---|---|--|---|---|---|-----------|--------|------|-----|
| 29068  | ZBTB44   |   |   |   |  |   |   |   | BC050723  | 30.69  | 2.28 | 61% |
| 7171   | TPM4     |   |   |   |  |   | Y |   | BC002827  | 17.61  | 2.28 | 61% |
| 5063   | PAK3     |   |   |   |  |   |   | Y | NM_002578 | 126.08 | 2.28 | 61% |
| 10944  | C11orf58 |   |   |   |  |   |   |   | NM_014267 | 163.17 | 2.29 | 61% |
| 5598   | MAPK7    |   |   |   |  |   |   | Y | NM_002749 | 270.14 | 2.29 | 61% |
| 4939   | OAS2     | Y |   |   |  |   |   | Y | BC049215  | 46.64  | 2.31 | 61% |
| 11200  | CHEK2    |   |   |   |  |   |   |   | BC004207  | 6.78   | 2.31 | 61% |
| 11092  | C9orf9   |   |   |   |  |   |   |   | NM_018956 | 68.47  | 2.31 | 61% |
| 1729   | DIAPH1   |   |   |   |  |   |   |   | BC007411  | 35.81  | 2.31 | 61% |
| 25898  | RCHY1    |   |   |   |  |   |   |   | BC047393  | 33.83  | 2.31 | 61% |
| 65062  | ALS2CR4  |   |   |   |  |   |   |   | BC029611  | 331.00 | 2.32 | 61% |
| 201163 | FLCN     |   |   |   |  |   |   |   | BC015725  | 74.78  | 2.32 | 61% |
| 4300   | MLLT3    |   |   |   |  |   |   |   | BC036089  | 23.03  | 2.32 | 61% |
| 814    | CAMK4    |   |   |   |  |   |   | Y | NM_001744 | 26.11  | 2.33 | 61% |
| 8440   | NCK2     |   |   |   |  |   |   |   | BC000103  | 106.44 | 2.33 | 61% |
| 6699   | SPRR1B   |   |   |   |  |   |   | Y | BC056240  | 22.58  | 2.33 | 61% |
| 23175  | LPIN1    |   |   |   |  |   |   |   | BC030537  | 71.53  | 2.33 | 61% |
| 7802   | DNALI1   |   |   |   |  |   |   |   | BC046117  | 57.28  | 2.33 | 61% |
| 4674   | NAP1L2   |   |   |   |  |   |   |   | BC026325  | 33.64  | 2.33 | 61% |
| 9014   | TAF1B    |   |   |   |  |   |   |   | BC018137  | 24.78  | 2.33 | 61% |
| 54431  | DNAJC10  |   |   |   |  |   |   |   | BC034713  | 29.44  | 2.34 | 61% |
| 137835 | TMEM71   |   |   |   |  |   |   | Y | BC062592  | 27.36  | 2.34 | 61% |
| 11336  | EXOC3    |   |   |   |  | Y |   |   | BC001511  | 30.47  | 2.34 | 61% |
| 26505  | CNNM3    |   |   |   |  |   |   |   | BC007199  | 54.83  | 2.35 | 61% |
| 57658  | CALCOCO1 |   |   |   |  |   |   |   | NM_020898 | 59.61  | 2.35 | 61% |
| 29097  | CNIH4    |   |   |   |  |   |   |   | NM_014184 | 17.44  | 2.35 | 61% |
| 10665  | C6orf10  |   |   |   |  |   |   |   | BC034774  | 93.25  | 2.35 | 61% |
| 2639   | GCDH     |   | Y | Y |  |   |   |   | NM_000159 | 20.25  | 2.35 | 61% |
| 51144  | HSD17B12 |   |   |   |  |   |   |   | BC012536  | 32.69  | 2.35 | 61% |
| 51019  | CCDC53   |   |   |   |  |   |   |   | BC010889  | 43.42  | 2.35 | 61% |
| 200185 | KRTCAP2  |   |   |   |  |   |   |   | NM_173852 | 20.58  | 2.35 | 61% |
| 84309  | NUDT16L1 |   |   |   |  |   |   |   | NM_032349 | 75.64  | 2.35 | 61% |
| 207    | AKT1     |   |   |   |  |   |   |   | BC000479  | 79.61  | 2.36 | 61% |
| 873    | CBR1     |   |   |   |  |   |   |   | NM_001757 | 13.31  | 2.36 | 61% |
| 55591  | VEZT     |   |   |   |  |   |   |   | BC064939  | 36.69  | 2.36 | 61% |
| 6675   | UAP1     |   |   | Y |  |   |   |   | NM_003115 | 43.97  | 2.36 | 61% |
| 9709   | HERPUD1  |   |   |   |  |   |   |   | NM_014685 | 36.39  | 2.36 | 61% |
| 54764  | ZRANB1   |   |   |   |  |   |   |   | BC048281  | 25.50  | 2.36 | 61% |
| 9741   | LAPTM4A  |   |   |   |  |   |   |   | NM_014713 | 29.39  | 2.37 | 61% |
| 56997  | CABC1    |   |   |   |  |   |   |   | NM_020247 | 23.64  | 2.37 | 61% |
| 138199 | C9orf41  |   |   |   |  |   |   |   | NM_152420 | 136.86 | 2.38 | 61% |
| 119    | ADD2     |   |   |   |  |   |   | Y | BC065525  | 158.42 | 2.38 | 61% |
| 1337   | COX6A1   |   |   |   |  |   |   |   | NM_004373 | 23.81  | 2.38 | 61% |
| 135    | ADORA2A  |   |   |   |  |   |   | Y | NM_000675 | 28.08  | 2.38 | 61% |
| 79656  | C1orf165 |   |   |   |  |   |   |   | BC011804  | 19.36  | 2.38 | 61% |
| 10159  | ATP6AP2  |   |   | Y |  |   |   |   | BC010395  | 23.92  | 2.38 | 61% |
| 745    | C11orf9  |   |   |   |  |   |   |   | BC004938  | 18.53  | 2.38 | 61% |
| 5082   | PDCL     |   |   |   |  |   |   |   | BC017227  | 18.50  | 2.39 | 61% |
| 6780   | STAU1    |   |   |   |  |   |   |   | BC050432  | 31.14  | 2.39 | 61% |
| 6626   | SNRPA    |   |   |   |  |   |   |   | NM_004596 | 30.17  | 2.39 | 61% |
| 5675   | PSG6     |   |   |   |  |   |   |   | BC020652  | 35.19  | 2.39 | 61% |
| 9796   | PHYHIP   | Y |   |   |  |   |   |   | NM_014759 | 45.86  | 2.40 | 61% |

|        |          |   |   |   |  |   |   |           |        |      |     |
|--------|----------|---|---|---|--|---|---|-----------|--------|------|-----|
| 9086   | EIF1AY   |   |   |   |  |   |   | BC005248  | 198.06 | 2.40 | 61% |
| 23179  | RGL1     | Y |   | Y |  |   |   | NM_015149 | 13.64  | 2.40 | 61% |
| 635    | BHMT     |   | Y | Y |  |   |   | BC012616  | 35.92  | 2.40 | 61% |
| 3550   | IK       |   |   |   |  |   |   | BC013005  | 21.06  | 2.40 | 61% |
| 140290 | TCP10L   |   |   |   |  |   |   | NM_144659 | 12.92  | 2.40 | 61% |
| 9948   | WDR1     |   |   |   |  |   |   | NM_017491 | 32.75  | 2.40 | 61% |
| 11269  | DDX19B   |   |   |   |  |   |   | NM_007242 | 34.03  | 2.41 | 61% |
| 57406  | ABHD6    |   | Y | Y |  |   |   | NM_020676 | 29.89  | 2.41 | 61% |
| 53354  | PANK1    |   | Y | Y |  |   |   | BC026296  | 17.36  | 2.41 | 61% |
| 54968  | TMEM70   |   |   |   |  |   |   | NM_017866 | 24.14  | 2.41 | 61% |
| 51202  | DDX47    |   |   |   |  |   |   | NM_016355 | 457.69 | 2.41 | 61% |
| 113457 | TUBA3D   |   |   |   |  |   |   | BC057810  | 36.81  | 2.41 | 61% |
| 11335  | CBX3     |   |   |   |  |   |   | BC000954  | 28.64  | 2.41 | 61% |
| 54494  | C11orf71 |   |   |   |  |   |   | NM_019021 | 46.56  | 2.42 | 61% |
| 3028   | HSD17B10 |   |   |   |  |   |   | BC008708  | 33.31  | 2.42 | 61% |
| 130026 | ICA1L    |   |   |   |  | Y | Y | NM_138468 | 20.94  | 2.42 | 61% |
| 64065  | PERP     |   |   |   |  |   | Y | NM_022121 | 15.42  | 2.43 | 61% |
| 57404  | CYP20A1  |   |   |   |  |   |   | BC033752  | 25.78  | 2.43 | 61% |
| 80014  | WWC2     |   |   |   |  |   |   | BC017957  | 56.72  | 2.43 | 61% |
| 64768  | IPPK     |   |   |   |  |   |   | NM_022755 | 19.92  | 2.43 | 61% |
| 23543  | RBM9     |   |   |   |  |   |   | BC013115  | 17.94  | 2.44 | 61% |
| 10320  | IKZF1    |   |   | Y |  |   | Y | BC018349  | 49.67  | 2.44 | 61% |
| 8479   | HIRIP3   |   |   |   |  |   |   | NM_003609 | 36.94  | 2.44 | 61% |
| 27072  | VPS41    |   |   |   |  |   |   | BC044851  | 23.08  | 2.44 | 61% |
| 10880  | ACTL7B   |   |   |   |  |   |   | NM_006686 | 16.81  | 2.44 | 61% |
| 6281   | S100A10  |   |   |   |  |   |   | NM_002966 | 20.00  | 2.45 | 61% |
| 81617  | CAB39L   |   |   |   |  |   | Y | BC010993  | 46.69  | 2.45 | 61% |
| 158248 | TTC16    |   |   |   |  |   |   | BC031281  | 71.36  | 2.46 | 61% |
| 25865  | PRKD2    |   |   |   |  |   |   | NM_016457 | 94.33  | 2.46 | 61% |
| 2776   | GNAQ     |   |   |   |  |   |   | NM_002072 | 26.19  | 2.46 | 61% |
| 2803   | GOLGA4   |   |   |   |  |   |   | BC050444  | 46.97  | 2.46 | 61% |
| 4287   | ATXN3    |   |   |   |  |   |   | BC033711  | 134.94 | 2.46 | 61% |
| 91     | ACVR1B   |   |   | Y |  |   |   | NM_020328 | 28.81  | 2.47 | 61% |
| 5979   | RET      |   |   |   |  |   |   | NM_020975 | 110.83 | 2.47 | 61% |
| 1543   | CYP1A1   |   |   |   |  | Y | Y | NM_000499 | 23.50  | 2.47 | 61% |
| 10730  | YME1L1   |   |   |   |  |   |   | NM_139313 | 23.56  | 2.47 | 61% |
| 57763  | ANKRA2   |   |   |   |  |   |   | NM_023039 | 67.97  | 2.47 | 61% |
| 1612   | DAPK1    |   |   |   |  |   |   | NM_004938 | 18.11  | 2.47 | 61% |
| 55795  | PCID2    |   |   |   |  |   |   | BC016614  | 22.14  | 2.48 | 61% |
| 3884   | KRT33B   |   |   |   |  |   |   | NM_002279 | 16.08  | 2.48 | 61% |
| 1912   | PHC2     |   |   |   |  |   |   | BC028396  | 25.75  | 2.49 | 61% |
| 116441 | TM4SF18  | Y |   | Y |  |   |   | NM_138786 | 29.06  | 2.49 | 61% |
| 6117   | RPA1     |   |   |   |  |   |   | NM_002945 | 94.19  | 2.49 | 61% |
| 11083  | DIDO1    |   |   |   |  |   |   | BC000770  | 25.42  | 2.49 | 61% |
| 339122 | RAB43    |   |   |   |  |   |   | NM_198490 | 31.97  | 2.49 | 61% |
| 3047   | HBG1     |   |   |   |  |   |   | NM_000559 | 21.00  | 2.50 | 61% |
| 10296  | MAEA     |   |   |   |  |   |   | BC006470  | 21.28  | 2.50 | 61% |
| 199746 | U2AF1L4  |   |   |   |  |   |   | NM_144987 | 13.92  | 2.50 | 61% |
| 64850  | AGXT2L1  |   | Y | Y |  |   |   | NM_031279 | 110.69 | 2.50 | 61% |
| 6878   | TAF6     |   |   |   |  |   |   | NM_005641 | 45.06  | 2.51 | 61% |
| 2585   | GALK2    |   | Y | Y |  |   |   | NM_002044 | 27.64  | 2.51 | 61% |
| 7172   | TPMT     |   |   | Y |  |   |   | BC005339  | 24.42  | 2.52 | 61% |

|        |           |   |   |   |  |  |  |   |           |        |      |     |
|--------|-----------|---|---|---|--|--|--|---|-----------|--------|------|-----|
| 6156   | RPL30     |   |   |   |  |  |  | Y | NM_000989 | 168.86 | 2.52 | 61% |
| 901    | CCNG2     |   |   |   |  |  |  |   | BC032518  | 29.92  | 2.52 | 61% |
| 6790   | AURKA     |   |   |   |  |  |  |   | NM_003600 | 28.75  | 2.52 | 61% |
| 51426  | POLK      |   |   |   |  |  |  |   | BC050718  | 30.64  | 2.52 | 61% |
| 152007 | C9orf19   |   |   |   |  |  |  | Y | BC017918  | 25.94  | 2.52 | 61% |
| 93081  | C13orf27  |   |   |   |  |  |  |   | NM_138779 | 62.31  | 2.53 | 61% |
| 9607   | CARTPT    |   |   |   |  |  |  |   | NM_004291 | 10.67  | 2.54 | 61% |
| 23139  | MAST2     |   |   |   |  |  |  |   | NM_015112 | 26.17  | 2.54 | 61% |
| 54943  | C21orf55  |   |   |   |  |  |  |   | BC029509  | 23.31  | 2.54 | 61% |
| 406    | ARNTL     |   |   |   |  |  |  |   | NM_001178 | 44.11  | 2.55 | 61% |
| 26298  | EHF       |   |   |   |  |  |  | Y | NM_012153 | 30.22  | 2.55 | 61% |
| 153241 | CCDC100   |   |   |   |  |  |  |   | BC040527  | 23.42  | 2.55 | 61% |
| 4143   | MAT1A     |   |   |   |  |  |  |   | BC018359  | 30.67  | 2.55 | 61% |
| 671    | BPI       |   |   |   |  |  |  |   | BC040955  | 21.08  | 2.55 | 61% |
| 4608   | MYBPH     |   |   |   |  |  |  |   | NM_004997 | 40.22  | 2.55 | 61% |
| 3620   | INDO      |   |   |   |  |  |  |   | NM_002164 | 84.17  | 2.56 | 61% |
| 138311 | FAM69B    |   |   |   |  |  |  |   | NM_152421 | 27.03  | 2.56 | 61% |
| 1453   | CSNK1D    |   |   |   |  |  |  |   | NM_139062 | 22.00  | 2.56 | 61% |
| 2542   | SLC37A4   |   | Y | Y |  |  |  |   | NM_001467 | 10.58  | 2.57 | 61% |
| 146456 | TMED6     |   | Y | Y |  |  |  |   | NM_144676 | 16.44  | 2.57 | 61% |
| 8468   | FKBP6     |   |   |   |  |  |  | Y | BC036817  | 24.39  | 2.57 | 61% |
| 9616   | RNF7      |   |   |   |  |  |  |   | NM_014245 | 37.56  | 2.58 | 61% |
| 3512   | IGJ       |   |   |   |  |  |  | Y | NM_144646 | 56.03  | 2.58 | 61% |
| 8893   | EIF2B5    |   |   |   |  |  |  |   | NM_003907 | 73.94  | 2.59 | 61% |
| 4086   | SMAD1     |   |   |   |  |  |  | Y | NM_005900 | 33.92  | 2.59 | 61% |
| 6297   | SALL2     |   |   |   |  |  |  |   | BC024245  | 20.42  | 2.59 | 61% |
| 7179   | TPTE      |   |   |   |  |  |  |   | BC028719  | 9.00   | 2.60 | 61% |
| 2787   | GNG5      |   |   |   |  |  |  |   | NM_005274 | 30.44  | 2.60 | 61% |
| 483    | ATP1B3    |   |   |   |  |  |  | Y | NM_001679 | 26.39  | 2.60 | 61% |
| 27316  | RBMX      |   |   |   |  |  |  |   | BC006550  | 49.69  | 2.60 | 61% |
| 95     | ACY1      |   | Y | Y |  |  |  |   | NM_000666 | 30.94  | 2.60 | 61% |
| 7529   | YWHAB     |   |   |   |  |  |  |   | BC010352  | 22.61  | 2.61 | 61% |
| 92305  | TMEM129   |   |   |   |  |  |  |   | NM_138385 | 16.25  | 2.61 | 61% |
| 196477 | C12orf12  |   |   |   |  |  |  |   | NM_152638 | 53.17  | 2.61 | 61% |
| 2044   | EPHA5     |   |   |   |  |  |  |   | NM_004439 | 79.00  | 2.61 | 61% |
| 6843   | VAMP1     |   |   |   |  |  |  |   | BC023286  | 37.69  | 2.62 | 61% |
| 4439   | MSH5      |   |   |   |  |  |  |   | BC041031  | 13.75  | 2.62 | 61% |
| 84064  | HDHD2     |   |   |   |  |  |  |   | NM_032124 | 16.50  | 2.63 | 61% |
| 5602   | MAPK10    |   |   |   |  |  |  |   | NM_002753 | 19.64  | 2.63 | 61% |
| 1984   | EIF5A     |   |   |   |  |  |  |   | NM_001970 | 12.75  | 2.63 | 61% |
| 282966 | C10orf53  |   |   |   |  |  |  |   | NM_182554 | 16.69  | 2.63 | 61% |
| 2321   | FLT1      | Y |   |   |  |  |  |   | NM_002019 | 160.39 | 2.64 | 61% |
| 51474  | LIMA1     |   |   |   |  |  |  |   | BC001247  | 23.69  | 2.64 | 61% |
| 128    | ADH5      |   |   |   |  |  |  |   | BC014665  | 30.94  | 2.64 | 61% |
| 115908 | CTHRC1    |   |   |   |  |  |  | Y | NM_138455 | 23.03  | 2.64 | 61% |
| 6167   | RPL37     |   |   |   |  |  |  |   | NM_000997 | 38.03  | 2.64 | 61% |
| 10425  | ARIH2     |   |   |   |  |  |  |   | NM_006321 | 15.00  | 2.65 | 61% |
| 4259   | MGST3     |   |   |   |  |  |  |   | NM_004528 | 19.00  | 2.65 | 61% |
| 2771   | GNAI2     |   |   |   |  |  |  |   | NM_002070 | 46.08  | 2.66 | 61% |
| 29965  | C16orf5   |   |   | Y |  |  |  |   | BC002882  | 18.89  | 2.66 | 61% |
| 84164  | ASCC2     |   |   |   |  |  |  | Y | NM_032204 | 12.36  | 2.67 | 61% |
| 112487 | C14orf126 |   |   |   |  |  |  |   | NM_080664 | 22.14  | 2.67 | 61% |



|        |           |  |   |   |  |  |   |           |           |           |       |      |     |
|--------|-----------|--|---|---|--|--|---|-----------|-----------|-----------|-------|------|-----|
| 6347   | CCL2      |  |   |   |  |  | Y | NM_002982 | 68.67     | 2.67      | 61%   |      |     |
| 54478  | FAM64A    |  |   |   |  |  | Y | BC013966  | 136.89    | 2.68      | 61%   |      |     |
| 54988  | FLJ20581  |  | Y | Y |  |  |   | BC016703  | 25.75     | 2.68      | 61%   |      |     |
| 80777  | CYB5B     |  |   |   |  |  | Y | NM_030579 | 13.53     | 2.69      | 61%   |      |     |
| 130013 | ACMSD     |  | Y | Y |  |  |   | NM_138326 | 14.64     | 2.69      | 61%   |      |     |
| 80347  | COASY     |  |   |   |  |  |   | BC020985  | 103.89    | 2.69      | 61%   |      |     |
| 6795   | AURKC     |  |   |   |  |  |   | NM_003160 | 144.22    | 2.69      | 61%   |      |     |
| 9921   | RNF10     |  |   |   |  |  |   | NM_014868 | 123.56    | 2.69      | 61%   |      |     |
| 79695  | GALNT12   |  |   |   |  |  | Y | Y         | BC013945  | 18.11     | 2.69  | 61%  |     |
| 2197   | FAU       |  |   |   |  |  |   | Y         | NM_001997 | 34.25     | 2.69  | 61%  |     |
| 79047  | KCTD15    |  |   |   |  |  |   |           | NM_024076 | 125.97    | 2.70  | 61%  |     |
| 54518  | APBB1IP   |  |   |   |  |  |   | Y         | BC035636  | 79.86     | 2.70  | 61%  |     |
| 64764  | CREB3L2   |  |   |   |  |  |   |           | BC063666  | 10.81     | 2.70  | 61%  |     |
| 136895 | C7orf31   |  |   |   |  |  |   |           | BC043269  | 16.81     | 2.70  | 61%  |     |
| 26258  | PLDN      |  |   |   |  |  |   |           | NM_012388 | 25.00     | 2.70  | 61%  |     |
| 25972  | UNC50     |  |   |   |  |  |   |           | NM_014044 | 77.00     | 2.70  | 61%  |     |
| 9209   | LRRFIP2   |  |   |   |  |  |   |           | NM_017724 | 20.36     | 2.71  | 61%  |     |
| 255520 | ELMOD2    |  |   |   |  |  |   |           | NM_153702 | 31.72     | 2.71  | 61%  |     |
| 25840  | METTL7A   |  |   | Y |  |  |   |           | NM_014033 | 22.06     | 2.71  | 61%  |     |
| 10947  | AP3M2     |  |   |   |  |  |   |           | BC056398  | 11.31     | 2.71  | 61%  |     |
| 328    | APEX1     |  |   |   |  |  |   | Y         | NM_001641 | 17.22     | 2.72  | 61%  |     |
| 80267  | EDEM3     |  |   |   |  |  |   |           | BC016464  | 39.92     | 2.72  | 61%  |     |
| 246778 | IL27      |  |   |   |  |  |   |           | BC062422  | 40.31     | 2.72  | 61%  |     |
| 7186   | TRAF2     |  |   |   |  |  |   |           | NM_021138 | 65.97     | 2.72  | 61%  |     |
| 2014   | EMP3      |  |   |   |  |  |   |           | NM_001425 | 15.06     | 2.73  | 61%  |     |
| 51148  | CEECAM1   |  |   |   |  |  |   |           | BC011811  | 16.11     | 2.73  | 61%  |     |
| 26515  | FXC1      |  |   |   |  |  |   |           | BC011014  | 14.67     | 2.73  | 61%  |     |
| 23014  | FBXO21    |  |   | Y |  |  |   |           | BC042333  | 57.89     | 2.73  | 61%  |     |
| 7184   | HSP90B1   |  |   |   |  |  |   |           | BC009195  | 18.94     | 2.73  | 61%  |     |
| 5607   | MAP2K5    |  |   |   |  |  |   |           | BC008838  | 18.14     | 2.73  | 61%  |     |
| 771    | CA12      |  | Y | Y |  |  |   |           | BC001012  | 30.11     | 2.74  | 61%  |     |
| 5743   | PTGS2     |  |   |   |  |  |   | Y         | NM_000963 | 21.75     | 2.74  | 61%  |     |
| 10681  | GNB5      |  |   |   |  |  |   |           | NM_006578 | 15.58     | 2.74  | 61%  |     |
| 4793   | NFKBIB    |  |   |   |  |  |   |           | NM_002503 | 16.47     | 2.75  | 61%  |     |
| 9519   | TBPL1     |  |   |   |  |  |   |           | BC000381  | 316.36    | 2.75  | 61%  |     |
| 128977 | LOC128977 |  |   |   |  |  |   |           | NM_173793 | 13.83     | 2.76  | 61%  |     |
| 60313  | GPBP1L1   |  |   |   |  |  |   |           | NM_021639 | 114.92    | 2.76  | 61%  |     |
| 54995  | OXSM      |  |   |   |  |  |   |           | NM_017897 | 19.19     | 2.77  | 61%  |     |
| 9929   | JOSD1     |  |   |   |  |  |   |           | NM_014876 | 26.17     | 2.77  | 61%  |     |
| 135886 | WBSCR28   |  |   |   |  |  |   |           | BC030643  | 19.83     | 2.77  | 61%  |     |
| 51166  | AADAT     |  |   |   |  |  |   |           | BC031068  | 63.56     | 2.77  | 61%  |     |
| 10363  | HMG20A    |  |   |   |  |  |   |           | NM_018200 | 16.94     | 2.77  | 61%  |     |
| 84432  | PROK1     |  |   |   |  |  |   |           | BC025399  | 24.25     | 2.78  | 61%  |     |
| 1318   | SLC31A2   |  |   |   |  |  |   |           | NM_001860 | 14.00     | 2.78  | 61%  |     |
| 27241  | BBS9      |  |   |   |  |  |   |           | BC032715  | 16.72     | 2.79  | 61%  |     |
| 65999  | LRRRC61   |  |   |   |  |  |   | Y         | Y         | NM_023942 | 22.25 | 2.79 | 61% |
| 338382 | RAB7B     |  |   |   |  |  |   |           | BC007382  | 79.33     | 2.80  | 61%  |     |
| 51501  | C11orf73  |  |   |   |  |  |   |           | NM_016401 | 16.17     | 2.80  | 61%  |     |
| 10211  | FLOT1     |  |   |   |  |  |   |           | NM_005803 | 27.31     | 2.80  | 61%  |     |
| 10055  | SAE1      |  |   |   |  |  |   |           | Y         | NM_005500 | 17.97 | 2.81 | 61% |
| 51503  | HSPC148   |  |   |   |  |  |   |           | BC040946  | 471.39    | 2.81  | 61%  |     |
| 347735 | SERINC2   |  |   |   |  |  |   |           | BC017085  | 30.22     | 2.81  | 61%  |     |

|        |          |   |   |   |   |   |  |     |           |        |      |     |
|--------|----------|---|---|---|---|---|--|-----|-----------|--------|------|-----|
| 9128   | PRPF4    |   |   |   |   |   |  |     | NM_004697 | 7.67   | 2.81 | 61% |
| 1635   | DCTD     |   |   |   |   |   |  |     | BC001286  | 34.78  | 2.82 | 61% |
| 23462  | HEY1     |   |   |   |   | Y |  |     | BC001873  | 13.75  | 2.83 | 61% |
| 55737  | VPS35    |   |   |   |   |   |  | Y   | BC010362  | 25.78  | 2.83 | 61% |
| 27063  | ANKRD1   |   |   |   |   |   |  |     | BC018667  | 23.22  | 2.83 | 61% |
| 51759  | C9orf78  |   |   |   |   |   |  |     | NM_016520 | 128.17 | 2.83 | 61% |
| 55746  | NUP133   |   |   |   |   |   |  |     | BC020107  | 17.56  | 2.83 | 61% |
| 6885   | MAP3K7   |   |   |   |   |   |  |     | NM_003188 | 14.47  | 2.83 | 61% |
| 27130  | INVS     |   |   |   |   |   |  |     | BC006370  | 31.64  | 2.84 | 61% |
| 26065  | LSM14A   |   |   |   |   |   |  |     | BC016842  | 31.42  | 2.84 | 61% |
| 956    | ENTPD3   |   |   |   |   |   |  | Y   | BC029869  | 12.97  | 2.84 | 61% |
| 9589   | WTAP     |   |   |   |   |   |  |     | NM_004906 | 11.33  | 2.85 | 61% |
| 8569   | MKNK1    |   |   |   |   |   |  |     | BC002755  | 12.19  | 2.87 | 61% |
| 23074  | KIAA0701 |   |   |   |   |   |  |     | BC014891  | 28.94  | 2.87 | 61% |
| 9140   | ATG12    |   |   |   |   |   |  |     | BC012266  | 34.92  | 2.89 | 61% |
| 79590  | MRPL24   |   |   |   |   |   |  |     | NM_024540 | 27.56  | 2.91 | 61% |
| 6197   | RPS6KA3  |   |   |   |   |   |  |     | NM_004586 | 17.92  | 2.91 | 61% |
| 1163   | CKS1B    |   |   |   |   |   |  |     | NM_001826 | 37.56  | 2.91 | 61% |
| 3839   | KPNA3    |   |   |   |   |   |  |     | BC017355  | 34.83  | 2.91 | 61% |
| 55214  | LEPREL1  |   |   |   |   |   |  |     | BC005029  | 29.47  | 2.92 | 61% |
| 4141   | MARS     |   |   |   |   |   |  |     | NM_004990 | 18.92  | 2.92 | 61% |
| 2819   | GPD1     |   | Y | Y |   |   |  |     | NM_005276 | 24.03  | 2.93 | 61% |
| 51398  | C19orf56 |   |   |   |   |   |  |     | NM_016145 | 30.17  | 2.93 | 61% |
| 124808 | CCDC43   |   |   |   |   |   |  |     | BC047776  | 11.42  | 2.94 | 61% |
| 9659   | PDE4DIP  |   |   |   |   |   |  | Y   | BC025406  | 108.00 | 2.95 | 61% |
| 1385   | CREB1    |   |   |   |   |   |  |     | NM_134442 | 14.28  | 2.95 | 61% |
| 3382   | ICA1     |   |   |   |   |   |  |     | BC005922  | 15.89  | 2.95 | 61% |
| 79849  | PDZD3    | Y | Y | Y |   |   |  |     | NM_024791 | 20.97  | 2.96 | 61% |
| 81608  | FIP1L1   |   |   |   |   |   |  |     | BC017724  | 93.69  | 2.97 | 61% |
| 6790   | AURKA    |   |   |   |   |   |  |     | NM_003600 | 40.97  | 2.98 | 61% |
| 10477  | UBE2E3   |   |   |   |   |   |  |     | NM_006357 | 17.17  | 2.98 | 61% |
| 92675  | HARS2    |   |   |   |   |   |  |     | BC045167  | 94.81  | 2.99 | 61% |
| 9649   | RALGPS1  |   |   |   |   |   |  |     | BC032372  | 11.69  | 2.99 | 61% |
| 8674   | VAMP4    |   |   |   |   |   |  |     | BC005974  | 50.75  | 3.01 | 61% |
| 6169   | RPL38    |   |   |   |   |   |  |     | NM_000999 | 21.58  | 3.01 | 61% |
| 81606  | LBH      |   |   |   |   |   |  | Y   | BC012373  | 43.28  | 3.02 | 61% |
| 2268   | FGR      |   |   |   |   |   |  |     | NM_005248 | 13.78  | 3.02 | 61% |
| 5105   | PCK1     |   | Y | Y |   |   |  |     | NM_002591 | 25.47  | 3.02 | 61% |
| 29781  | NCAPH2   |   |   |   |   |   |  |     | NM_014551 | 42.25  | 3.03 | 61% |
| 4216   | MAP3K4   |   |   |   |   |   |  |     | NM_005922 | 18.44  | 3.04 | 61% |
| 138065 | RNF183   | Y |   |   |   |   |  |     | NM_145051 | 13.92  | 3.05 | 61% |
| 114904 | C1QTNF6  |   |   |   |   |   |  |     | NM_031910 | 62.94  | 3.05 | 61% |
| 10435  | CDC42EP2 |   |   |   |   |   |  | Y   | NM_006779 | 118.67 | 3.05 | 61% |
| 1846   | DUSP4    |   |   |   |   |   |  | Y Y | NM_001394 | 16.86  | 3.05 | 61% |
| 375341 | C3orf62  |   |   |   |   |   |  |     | BC061697  | 15.42  | 3.06 | 61% |
| 158471 | PRUNE2   |   |   |   | Y |   |  |     | NM_138818 | 26.11  | 3.06 | 61% |
| 7373   | COL14A1  |   |   |   |   |   |  |     | BC014640  | 27.14  | 3.06 | 61% |
| 8780   | RIOK3    |   |   |   |   |   |  |     | NM_003831 | 11.61  | 3.06 | 61% |
| 51277  | RBJ      |   |   |   |   |   |  |     | NM_016544 | 50.50  | 3.09 | 61% |
| 662    | BNIP1    |   |   |   |   |   |  |     | BC010959  | 12.75  | 3.10 | 61% |
| 8048   | CSRP3    |   |   |   |   |   |  |     | NM_003476 | 32.69  | 3.10 | 61% |
| 83606  | C22orf13 |   | Y | Y |   |   |  |     | BC070109  | 50.72  | 3.11 | 61% |

|        |           |   |   |   |  |  |   |           |        |      |     |
|--------|-----------|---|---|---|--|--|---|-----------|--------|------|-----|
| 5000   | ORC4L     |   |   |   |  |  |   | BC014847  | 28.78  | 3.11 | 61% |
| 117177 | RAB3IP    |   |   |   |  |  |   | BC015548  | 12.53  | 3.11 | 61% |
| 217    | ALDH2     |   | Y | Y |  |  |   | NM_000690 | 16.61  | 3.12 | 61% |
| 8677   | STX10     |   |   |   |  |  |   | BC017237  | 27.53  | 3.12 | 61% |
| 55014  | STX17     |   |   |   |  |  |   | BC051790  | 15.31  | 3.12 | 61% |
| 26576  | SRPK3     |   |   |   |  |  |   | NM_014370 | 70.39  | 3.13 | 61% |
| 10436  | EMG1      |   |   |   |  |  | Y | BC055314  | 12.94  | 3.13 | 61% |
| 9252   | RPS6KA5   |   |   |   |  |  | Y | NM_004755 | 57.39  | 3.13 | 61% |
| 28231  | SLCO4A1   |   |   |   |  |  | Y | BC025345  | 111.58 | 3.13 | 61% |
| 958    | CD40      | Y |   |   |  |  | Y | NM_001250 | 11.47  | 3.13 | 61% |
| 55778  | C14orf131 |   |   |   |  |  |   | BC006222  | 34.22  | 3.14 | 61% |
| 8574   | AKR7A2    |   | Y | Y |  |  |   | BC010852  | 33.89  | 3.15 | 61% |
| 8942   | KYNU      |   |   | Y |  |  | Y | BC000879  | 33.72  | 3.16 | 61% |
| 2987   | GUK1      |   |   |   |  |  |   | NM_000858 | 38.00  | 3.18 | 61% |
| 151393 | FAM82A    |   |   |   |  |  |   | BC024243  | 18.86  | 3.18 | 61% |
| 84303  | CHCHD6    |   |   |   |  |  |   | NM_032343 | 23.33  | 3.18 | 61% |
| 23408  | SIRT5     |   |   |   |  |  | Y | NM_012241 | 45.83  | 3.19 | 61% |
| 83450  | LRRC48    |   |   |   |  |  |   | BC050419  | 26.19  | 3.20 | 61% |
| 26135  | SERBP1    |   |   |   |  |  |   | NM_015640 | 168.75 | 3.21 | 61% |
| 94081  | SFXN1     |   |   |   |  |  |   | BC020517  | 17.50  | 3.21 | 61% |
| 6903   | TBCC      |   |   |   |  |  |   | NM_003192 | 54.69  | 3.21 | 61% |
| 2267   | FGL1      |   |   |   |  |  | Y | BC007047  | 10.14  | 3.21 | 61% |
| 26097  | C1orf77   |   |   |   |  |  |   | BC002733  | 63.50  | 3.21 | 61% |
| 84310  | MGC11257  |   |   |   |  |  |   | NM_032350 | 240.97 | 3.21 | 61% |
| 23048  | FBNP1     | Y |   |   |  |  | Y | BC009262  | 12.36  | 3.22 | 61% |
| 83787  | ARMC10    |   |   |   |  |  |   | BC003586  | 13.22  | 3.23 | 61% |
| 875    | CBS       |   |   |   |  |  | Y | NM_000071 | 22.11  | 3.23 | 61% |
| 3964   | LGALS8    |   |   |   |  |  |   | BC014452  | 29.33  | 3.24 | 61% |
| 130827 | TMEM182   |   |   |   |  |  | Y | BC020898  | 14.11  | 3.24 | 61% |
| 7597   | ZBTB25    |   |   |   |  |  |   | NM_006977 | 31.97  | 3.25 | 61% |
| 3151   | HMG2      |   |   |   |  |  |   | NM_005517 | 527.39 | 3.25 | 61% |
| 2027   | ENO3      |   |   |   |  |  | Y | BC017249  | 16.14  | 3.25 | 61% |
| 4350   | MPG       |   |   |   |  |  |   | BC014991  | 50.11  | 3.25 | 61% |
| 9559   | VPS26A    |   |   |   |  |  |   | NM_004896 | 12.39  | 3.25 | 61% |
| 51008  | ASCC1     |   |   |   |  |  |   | BC012291  | 32.31  | 3.26 | 61% |
| 8894   | EIF2S2    |   |   |   |  |  |   | BC007888  | 62.89  | 3.26 | 61% |
| 143686 | SESN3     |   |   |   |  |  | Y | BC017296  | 12.78  | 3.27 | 61% |
| 23265  | EXOC7     |   |   |   |  |  |   | BC015165  | 19.36  | 3.27 | 61% |
| 5993   | RFX5      |   |   |   |  |  |   | NM_000449 | 20.72  | 3.27 | 61% |
| 1009   | CDH11     |   |   |   |  |  | Y | BC013609  | 13.61  | 3.28 | 61% |
| 55905  | ZNF313    |   |   |   |  |  |   | NM_018683 | 42.94  | 3.28 | 61% |
| 80705  | TSGA10    |   |   |   |  |  |   | BC028366  | 54.31  | 3.28 | 61% |
| 1861   | TOR1A     |   |   |   |  |  |   | BC014484  | 29.31  | 3.28 | 61% |
| 64518  | TEKT3     |   |   |   |  |  |   | BC031688  | 14.61  | 3.28 | 61% |
| 51365  | PLA1A     | Y |   |   |  |  |   | BC047703  | 15.83  | 3.29 | 61% |
| 81618  | ITM2C     |   |   |   |  |  |   | BC002424  | 20.72  | 3.29 | 61% |
| 51142  | CHCHD2    |   |   |   |  |  |   | NM_016139 | 18.47  | 3.30 | 61% |
| 4828   | NMB       |   |   |   |  |  |   | BC007407  | 11.89  | 3.31 | 61% |
| 573    | BAG1      |   |   |   |  |  | Y | BC014774  | 12.64  | 3.31 | 61% |
| 10589  | DRAP1     |   |   |   |  |  |   | NM_006442 | 10.33  | 3.31 | 61% |
| 5899   | RALB      |   |   |   |  |  |   | NM_002881 | 109.31 | 3.32 | 61% |
| 4477   | MSMB      |   |   |   |  |  | Y | NM_002443 | 16.81  | 3.32 | 61% |

|        |              |   |   |   |  |   |   |              |        |      |     |
|--------|--------------|---|---|---|--|---|---|--------------|--------|------|-----|
| 8796   | SCEL         |   |   |   |  |   |   | BC047536     | 80.89  | 3.34 | 61% |
| 25875  | LETMD1       |   |   |   |  |   |   | BC000395     | 8.33   | 3.35 | 61% |
| 51186  | WBP5         |   |   |   |  |   |   | NM_016303    | 19.19  | 3.36 | 61% |
| 56853  | BRUNOL4      |   |   |   |  |   |   | BC001946     | 18.97  | 3.37 | 61% |
| 84173  | RBED1        |   |   |   |  |   |   | NM_032213    | 14.19  | 3.39 | 61% |
| 55347  | ABHD10       |   | Y | Y |  |   |   | NM_018394    | 15.17  | 3.41 | 61% |
| 4879   | NPPB         |   |   |   |  |   |   | NM_002521    | 12.56  | 3.41 | 61% |
| 2999   | GZMH         | Y |   |   |  |   | Y | NM_033423    | 16.56  | 3.43 | 61% |
| 64428  | NARFL        |   |   |   |  |   |   | NM_022493    | 15.03  | 3.43 | 61% |
| 11267  | SNF8         |   |   |   |  |   |   | NM_007241    | 11.03  | 3.44 | 61% |
| 8613   | PPAP2B       | Y |   |   |  |   |   | BC009196     | 16.28  | 3.45 | 61% |
| 6607   | SMN2         |   |   |   |  |   |   | NM_017411    | 15.56  | 3.46 | 61% |
| 79640  | CTA-216E10.6 |   |   |   |  |   |   | NM_024588    | 18.03  | 3.46 | 61% |
| 6885   | MAP3K7       |   |   |   |  |   |   | NM_003188    | 25.64  | 3.46 | 61% |
| 788    | SLC25A20     |   |   |   |  |   |   | NM_000387    | 16.28  | 3.47 | 61% |
| 5562   | PRKAA1       |   |   |   |  |   |   | NM_006251    | 10.19  | 3.47 | 61% |
| 79646  | PANK3        |   |   |   |  |   |   | NM_024594    | 15.56  | 3.48 | 61% |
| 57488  | FAM62B       |   |   |   |  | Y |   | BC013957     | 23.44  | 3.48 | 61% |
| 59286  | UBL5         |   |   |   |  |   |   | NM_024292    | 36.06  | 3.48 | 61% |
| 63827  | BCAN         |   |   |   |  |   | Y | BC010117     | 11.28  | 3.50 | 61% |
| 7167   | TPI1         |   |   |   |  |   |   | BC017917     | 60.42  | 3.51 | 61% |
| 5580   | PRKCD        |   |   |   |  |   | Y | NM_006254    | 19.17  | 3.51 | 61% |
| 5582   | PRKCG        |   |   |   |  |   |   | NM_002739    | 13.39  | 3.53 | 61% |
| 151531 | UPP2         |   | Y | Y |  |   |   | BC033529     | 17.06  | 3.54 | 61% |
| 51068  | NMD3         |   |   |   |  |   |   | NM_015938    | 9.28   | 3.54 | 61% |
| 8161   | COIL         |   |   |   |  |   |   | NM_004645    | 170.78 | 3.55 | 61% |
| 3198   | HOXA1        |   |   |   |  |   | Y | NM_005522    | 73.22  | 3.55 | 61% |
| 10768  | AHCYL1       |   |   | Y |  |   |   | BC016942     | 30.53  | 3.58 | 61% |
| 326625 | MMAB         |   |   |   |  |   |   | NM_052845    | 79.28  | 3.58 | 61% |
| 3646   | EIF3S6       |   |   |   |  |   | Y | BC005944     | 18.00  | 3.59 | 61% |
| 5635   | PRPSAP1      |   |   |   |  |   |   | BC009012     | 19.94  | 3.59 | 61% |
| 10285  | SMNDC1       |   |   |   |  |   |   | BC011234     | 28.56  | 3.60 | 61% |
| 2305   | FOXM1        |   |   |   |  |   |   | BC006192     | 43.56  | 3.60 | 61% |
| 9094   | UNC119       |   |   |   |  |   |   | NM_005148    | 75.94  | 3.60 | 61% |
| 6949   | TCOF1        |   |   |   |  |   |   | NM_001008657 | 40.00  | 3.61 | 61% |
| 10085  | EDIL3        |   |   |   |  |   |   | BC053656     | 35.11  | 3.61 | 61% |
| 283899 | CCDC95       |   |   |   |  |   |   | NM_173618    | 87.36  | 3.61 | 61% |
| 10218  | ANGPTL7      |   |   |   |  |   |   | NM_021146    | 14.28  | 3.63 | 61% |
| 50810  | HDFGRP3      |   |   |   |  |   |   | NM_016073    | 13.17  | 3.63 | 61% |
| 118    | ADD1         |   |   |   |  |   |   | BC013393     | 26.94  | 3.65 | 61% |
| 29956  | LASS2        |   |   | Y |  |   |   | BC010032     | 12.64  | 3.65 | 61% |
| 8444   | DYRK3        |   |   |   |  |   |   | NM_003582    | 76.22  | 3.65 | 61% |
| 54884  | RETSAT       |   |   | Y |  |   |   | BC011418     | 14.36  | 3.66 | 61% |
| 64100  | ELSPBP1      |   |   |   |  |   |   | NM_022142    | 14.83  | 3.68 | 61% |
| 83732  | RIOK1        |   |   |   |  |   |   | BC006104     | 15.86  | 3.68 | 61% |
| 54555  | DDX49        |   |   |   |  |   |   | BC000979     | 25.58  | 3.69 | 61% |
| 9073   | CLDN8        |   |   |   |  |   |   | NM_199328    | 15.56  | 3.70 | 61% |
| 10492  | SYNCRIP      |   |   |   |  |   |   | BC040844     | 24.97  | 3.70 | 61% |
| 91612  | CHURC1       |   |   |   |  |   |   | BC020550     | 12.14  | 3.71 | 61% |
| 92840  | REEP6        |   | Y | Y |  |   |   | BC008201     | 8.58   | 3.71 | 61% |
| 4103   | MAGEA4       |   |   |   |  |   |   | NM_002362    | 17.08  | 3.72 | 61% |
| 23210  | JMJD6        |   |   |   |  |   |   | BC066654     | 47.83  | 3.74 | 61% |

|        |          |   |   |   |  |  |   |  |           |        |      |     |
|--------|----------|---|---|---|--|--|---|--|-----------|--------|------|-----|
| 5499   | PPP1CA   |   |   |   |  |  |   |  | NM_002708 | 9.72   | 3.75 | 61% |
| 10857  | PGRMC1   |   |   |   |  |  |   |  | NM_006667 | 55.28  | 3.76 | 61% |
| 10914  | PAPOLA   |   |   |   |  |  |   |  | NM_032632 | 53.08  | 3.78 | 61% |
| 661    | POLR3D   |   |   |   |  |  |   |  | NM_001722 | 52.47  | 3.78 | 61% |
| 201254 | STRA13   |   |   |   |  |  | Y |  | BC009571  | 34.58  | 3.80 | 61% |
| 2353   | FOS      |   |   |   |  |  |   |  | NM_005252 | 20.22  | 3.82 | 61% |
| 79663  | HSPBAP1  |   |   |   |  |  |   |  | NM_024610 | 17.47  | 3.84 | 61% |
| 8800   | PEX11A   |   |   |   |  |  |   |  | NM_003847 | 25.97  | 3.84 | 61% |
| 6385   | SDC4     |   |   |   |  |  |   |  | BC030805  | 8.81   | 3.88 | 61% |
| 6928   | TCF2     |   |   |   |  |  |   |  | NM_000458 | 11.39  | 3.88 | 61% |
| 5414   | Sep4     | Y |   |   |  |  |   |  | NM_004574 | 181.86 | 3.89 | 61% |
| 3603   | IL16     |   |   |   |  |  | Y |  | BC040272  | 11.08  | 3.89 | 61% |
| 55236  | UBE1L2   |   |   |   |  |  |   |  | BC031637  | 18.03  | 3.89 | 61% |
| 286    | ANK1     |   |   |   |  |  |   |  | BC030957  | 22.33  | 3.91 | 61% |
| 3281   | HSBP1    |   |   |   |  |  |   |  | NM_001537 | 25.06  | 3.92 | 61% |
| 10298  | PAK4     |   |   |   |  |  |   |  | NM_005884 | 9.08   | 3.92 | 61% |
| 55705  | IPO9     |   |   |   |  |  |   |  | BC003604  | 24.97  | 3.92 | 61% |
| 55215  | KIAA1794 |   |   |   |  |  |   |  | BC004277  | 3.81   | 3.92 | 61% |
| 6777   | STAT5B   |   |   |   |  |  |   |  | BC020868  | 23.08  | 3.93 | 61% |
| 1360   | CPB1     |   |   |   |  |  |   |  | NM_001871 | 16.86  | 3.93 | 61% |
| 114876 | OSBPL1A  |   |   |   |  |  |   |  | BC041563  | 11.92  | 3.95 | 61% |
| 8848   | TSC22D1  | Y |   |   |  |  |   |  | NM_006022 | 12.33  | 3.95 | 61% |
| 114907 | FBXO32   |   |   |   |  |  |   |  | BC024030  | 18.92  | 3.97 | 61% |
| 10988  | METAP2   |   |   |   |  |  | Y |  | NM_006838 | 30.17  | 3.99 | 61% |
| 57414  | RHBDD2   |   |   |   |  |  |   |  | BC006234  | 13.81  | 3.99 | 61% |
| 2047   | EPHB1    |   | Y | Y |  |  |   |  | NM_004441 | 15.56  | 4.00 | 61% |
| 127018 | LYPLAL1  |   |   | Y |  |  |   |  | NM_138794 | 13.17  | 4.01 | 61% |
| 153339 | TMEM167  |   |   |   |  |  |   |  | NM_174909 | 5.72   | 4.03 | 61% |
| 137492 | VPS37A   |   |   |   |  |  |   |  | BC022363  | 14.53  | 4.04 | 61% |
| 5747   | PTK2     |   |   |   |  |  |   |  | NM_153831 | 29.58  | 4.05 | 61% |
| 6203   | RPS9     |   |   |   |  |  | Y |  | NM_001013 | 22.53  | 4.06 | 61% |
| 54107  | POLE3    |   |   |   |  |  |   |  | BC003166  | 52.81  | 4.06 | 61% |
| 55038  | CDCA4    |   |   |   |  |  |   |  | BC025263  | 13.94  | 4.08 | 61% |
| 2709   | GJB5     |   |   |   |  |  | Y |  | NM_005268 | 21.89  | 4.09 | 61% |
| 27350  | APOBEC3C |   |   |   |  |  | Y |  | BC011739  | 14.42  | 4.12 | 61% |
| 10933  | MORF4L1  |   |   |   |  |  |   |  | NM_006791 | 18.94  | 4.12 | 61% |
| 5366   | PMAIP1   |   |   |   |  |  |   |  | BC032663  | 9.25   | 4.14 | 61% |
| 26207  | PITPNC1  |   |   |   |  |  |   |  | NM_181671 | 5.94   | 4.15 | 61% |
| 3185   | HNRPF    |   |   |   |  |  | Y |  | NM_004966 | 115.64 | 4.17 | 61% |
| 123263 | MTFMT    |   |   |   |  |  |   |  | NM_139242 | 10.53  | 4.18 | 61% |
| 5879   | RAC1     |   |   |   |  |  |   |  | BC004247  | 9.72   | 4.18 | 61% |
| 9499   | MYOT     |   |   |   |  |  |   |  | NM_006790 | 16.00  | 4.20 | 61% |
| 6714   | SRC      |   |   |   |  |  |   |  | NM_005417 | 14.64  | 4.23 | 61% |
| 29916  | SNX11    |   |   |   |  |  |   |  | NM_013323 | 3.92   | 4.24 | 61% |
| 81887  | LAS1L    |   |   |   |  |  |   |  | BC019302  | 15.03  | 4.25 | 61% |
| 5264   | PHYH     |   | Y | Y |  |  |   |  | NM_006214 | 9.17   | 4.27 | 61% |
| 3964   | LGALS8   |   |   |   |  |  |   |  | BC014452  | 16.44  | 4.27 | 61% |
| 8878   | SQSTM1   |   |   |   |  |  | Y |  | NM_003900 | 18.61  | 4.30 | 61% |
| 51077  | FCF1     |   |   |   |  |  |   |  | BC022361  | 26.47  | 4.30 | 61% |
| 5834   | PYGB     |   |   |   |  |  |   |  | NM_002862 | 16.89  | 4.33 | 61% |
| 84319  | C3orf26  |   |   |   |  |  |   |  | NM_032359 | 13.44  | 4.33 | 61% |
| 4088   | SMAD3    |   |   |   |  |  | Y |  | NM_005902 | 15.42  | 4.34 | 61% |

|        |               |   |   |   |  |  |   |  |           |       |      |     |
|--------|---------------|---|---|---|--|--|---|--|-----------|-------|------|-----|
| 85363  | TRIM5         |   |   |   |  |  |   |  | BC021258  | 9.64  | 4.35 | 61% |
| 55090  | MED9          |   |   |   |  |  |   |  | NM_018019 | 20.00 | 4.35 | 61% |
| 2132   | EXT2          |   |   |   |  |  |   |  | NM_000401 | 12.28 | 4.41 | 61% |
| 23632  | CA14          |   |   |   |  |  |   |  | NM_012113 | 11.72 | 4.47 | 61% |
| 51286  | CEND1         |   |   |   |  |  |   |  | NM_016564 | 13.53 | 4.53 | 61% |
| 84545  | MRPL43        |   |   |   |  |  |   |  | BC052639  | 8.89  | 4.54 | 61% |
| 974    | CD79B         |   |   |   |  |  | Y |  | BC030210  | 10.53 | 4.57 | 61% |
| 4515   | MTCP1         |   |   |   |  |  |   |  | NM_014221 | 14.03 | 4.57 | 61% |
| 28966  | SNX24         |   |   | Y |  |  |   |  | NM_014035 | 10.39 | 4.57 | 61% |
| 7013   | TERF1         |   |   |   |  |  |   |  | BC029378  | 45.56 | 4.61 | 61% |
| 7009   | TEGT          |   |   | Y |  |  |   |  | BC000916  | 12.92 | 4.61 | 61% |
| 11103  | KRR1          |   |   |   |  |  | Y |  | BC016778  | 74.03 | 4.68 | 61% |
| 328    | APEX1         |   |   |   |  |  | Y |  | NM_001641 | 21.78 | 4.72 | 61% |
| 1453   | CSNK1D        |   |   |   |  |  |   |  | NM_139062 | 8.47  | 4.81 | 61% |
| 9      | NAT1          |   |   |   |  |  |   |  | BC047666  | 9.44  | 4.84 | 61% |
| 112950 | MED8          |   |   |   |  |  |   |  | NM_052877 | 34.42 | 4.85 | 61% |
| 8832   | CD84          |   |   |   |  |  |   |  | NM_003874 | 22.86 | 4.93 | 61% |
| 80201  | HKDC1         |   |   |   |  |  |   |  | BC021278  | 20.39 | 4.96 | 61% |
| 54474  | KRT20         |   |   |   |  |  | Y |  | NM_019010 | 4.33  | 5.02 | 61% |
| 440    | ASNS          |   |   |   |  |  |   |  | NM_001673 | 10.69 | 5.07 | 61% |
| 4771   | NF2           |   |   |   |  |  |   |  | BC020257  | 9.00  | 5.11 | 61% |
| 83988  | NCALD         |   |   | Y |  |  |   |  | BC009949  | 9.58  | 5.24 | 61% |
| 23635  | SSBP2         |   |   |   |  |  |   |  | BC017020  | 13.64 | 5.36 | 61% |
| 8851   | CDK5R1        |   |   |   |  |  | Y |  | NM_003885 | 22.83 | 5.41 | 61% |
| 56922  | MCCC1         |   |   |   |  |  |   |  | NM_020166 | 10.33 | 5.42 | 61% |
| 2123   | EVI2A         |   |   |   |  |  | Y |  | BC035572  | 22.67 | 5.43 | 61% |
| 55450  | CAMK2N1       |   |   | Y |  |  |   |  | BC020630  | 6.00  | 5.44 | 61% |
| 57035  | C1orf63       |   |   |   |  |  |   |  | NM_020317 | 18.83 | 5.48 | 61% |
| 79847  | TMEM180       |   |   |   |  |  |   |  | BC057787  | 7.36  | 5.54 | 61% |
| 55789  | DEPDC1B       |   | Y | Y |  |  |   |  | BC010904  | 7.25  | 5.62 | 61% |
| 4921   | DDR2          |   |   |   |  |  | Y |  | NM_006182 | 38.08 | 5.67 | 61% |
| 84861  | KLHL22        |   |   |   |  |  |   |  | NM_032775 | 8.78  | 5.70 | 61% |
| 56986  | DTWD1         |   |   |   |  |  | Y |  | NM_020234 | 10.75 | 5.84 | 61% |
| 10555  | AGPAT2        |   |   |   |  |  |   |  | BC000026  | 13.19 | 5.90 | 61% |
| 8260   | ARD1A         |   |   |   |  |  |   |  | NM_003491 | 7.36  | 5.92 | 61% |
| 10864  | SLC22A7       | Y | Y |   |  |  |   |  | NM_153320 | 29.83 | 5.96 | 61% |
| 1432   | MAPK14        |   |   |   |  |  |   |  | NM_139012 | 14.58 | 5.98 | 61% |
| 1672   | DEFB1         |   | Y | Y |  |  |   |  | NM_005218 | 7.03  | 6.01 | 61% |
| 72     | ACTG2         |   |   |   |  |  | Y |  | NM_001615 | 11.67 | 6.02 | 61% |
| 25849  | DKFZP564O0823 |   |   |   |  |  | Y |  | BC013294  | 17.06 | 6.05 | 61% |
| 2742   | GLRA2         |   |   |   |  |  |   |  | BC032864  | 17.11 | 6.11 | 61% |
| 26010  | DNAPTP6       |   |   |   |  |  |   |  | BC018736  | 12.28 | 6.14 | 61% |
| 5689   | PSMB1         |   |   |   |  |  |   |  | NM_002793 | 3.61  | 6.27 | 61% |
| 5603   | MAPK13        |   |   |   |  |  | Y |  | NM_002754 | 22.17 | 6.30 | 61% |
| 51528  | C14orf100     |   |   |   |  |  |   |  | NM_016475 | 10.75 | 6.31 | 61% |
| 5912   | RAP2B         |   |   |   |  |  | Y |  | BC012362  | 3.75  | 6.45 | 61% |
| 4998   | ORC1L         |   |   |   |  |  |   |  | NM_004153 | 15.92 | 6.51 | 61% |
| 127435 | PODN          |   |   |   |  |  | Y |  | BC030608  | 10.92 | 6.54 | 61% |
| 6609   | SMPD1         |   |   |   |  |  |   |  | BC041164  | 14.89 | 6.58 | 61% |
| 7032   | TFF2          |   |   |   |  |  |   |  | NM_005423 | 10.50 | 6.89 | 61% |
| 3308   | HSPA4         |   |   |   |  |  |   |  | BC002526  | 10.08 | 6.90 | 61% |
| 11127  | KIF3A         |   |   |   |  |  |   |  | NM_007054 | 43.72 | 6.92 | 61% |

|        |          |   |   |   |  |   |   |  |           |       |       |     |
|--------|----------|---|---|---|--|---|---|--|-----------|-------|-------|-----|
| 23743  | BHMT2    | Y | Y | Y |  |   |   |  | NM_017614 | 5.83  | 7.04  | 61% |
| 9265   | PSCD3    |   |   |   |  |   |   |  | NM_004227 | 4.11  | 7.15  | 61% |
| 443    | ASPA     |   |   |   |  |   |   |  | NM_000049 | 16.42 | 7.21  | 61% |
| 1316   | KLF6     |   |   |   |  |   |   |  | BC004301  | 12.33 | 7.29  | 61% |
| 2039   | EPB49    |   |   |   |  |   |   |  | BC006318  | 17.39 | 7.74  | 61% |
| 2022   | ENG      | Y |   |   |  |   |   |  | BC014271  | 13.56 | 7.75  | 61% |
| 26225  | ARL5A    |   |   |   |  |   |   |  | NM_012097 | 18.03 | 7.80  | 61% |
| 249    | ALPL     |   | Y | Y |  |   |   |  | BC021289  | 8.33  | 7.98  | 61% |
| 2806   | GOT2     |   |   |   |  |   |   |  | BC000525  | 11.94 | 8.08  | 61% |
| 54965  | PIGX     |   |   |   |  |   |   |  | NM_017861 | 8.97  | 8.11  | 61% |
| 83719  | YPEL3    |   |   |   |  |   |   |  | NM_031477 | 9.00  | 8.21  | 61% |
| 84418  | C5orf32  |   |   |   |  |   |   |  | BC023982  | 12.42 | 8.24  | 61% |
| 64429  | ZDHHC6   | Y |   |   |  |   |   |  | BC007213  | 3.47  | 8.40  | 61% |
| 91703  | ACY3     |   | Y | Y |  |   |   |  | NM_080658 | 15.72 | 8.46  | 61% |
| 2273   | FHL1     |   |   |   |  |   | Y |  | NM_001449 | 79.28 | 8.51  | 61% |
| 6503   | SLA      | Y |   |   |  |   |   |  | NM_006748 | 6.19  | 8.81  | 61% |
| 84693  | MCEE     |   |   |   |  |   |   |  | NM_032601 | 5.03  | 8.90  | 61% |
| 7850   | IL1R2    |   |   |   |  |   |   |  | NM_004633 | 3.33  | 9.03  | 61% |
| 805    | CALM2    |   |   |   |  |   |   |  | BC008437  | 8.03  | 9.06  | 61% |
| 203286 | ANKS6    | Y |   |   |  |   |   |  | BC064367  | 12.94 | 9.38  | 61% |
| 114883 | OSBPL9   |   |   |   |  |   |   |  | NM_148904 | 5.86  | 10.76 | 61% |
| 54861  | SNRK     |   |   |   |  |   |   |  | NM_017719 | 8.69  | 10.78 | 61% |
| 1397   | CRIP2    |   |   |   |  |   |   |  | NM_001312 | 7.89  | 11.32 | 61% |
| 221002 | RASGEF1A |   |   |   |  | Y |   |  | NM_145313 | 3.19  | 12.01 | 61% |
| 64853  | C1orf80  |   |   |   |  |   |   |  | BC015535  | 5.08  | 12.13 | 61% |
| 273    | AMPH     |   |   |   |  | Y |   |  | BC034376  | 20.19 | 12.54 | 61% |
| 90523  | C6orf142 |   |   |   |  |   | Y |  | BC009010  | 11.72 | 12.91 | 61% |
| 56895  | AGPAT4   |   |   |   |  | Y |   |  | NM_020133 | 35.72 | 13.22 | 61% |
| 57102  | C12orf4  |   |   |   |  |   |   |  | NM_020374 | 1.64  | 13.25 | 61% |
| 57097  | PARP11   |   |   |   |  |   |   |  | BC031073  | 8.11  | 13.46 | 61% |
| 5705   | PSMC5    |   |   |   |  |   |   |  | NM_002805 | 5.31  | 13.51 | 61% |
| 92105  | INTS4    |   |   |   |  |   |   |  | NM_033547 | 3.47  | 13.88 | 61% |
| 4327   | MMP19    |   |   |   |  |   | Y |  | NM_002429 | 7.61  | 13.97 | 61% |
| 51004  | COQ6     |   |   |   |  |   |   |  | BC014181  | 6.03  | 14.13 | 61% |
| 55166  | CENPQ    |   |   |   |  |   |   |  | NM_018132 | 2.25  | 14.24 | 61% |
| 11162  | NUDT6    |   |   |   |  |   |   |  | NM_007083 | 4.28  | 15.77 | 61% |
| 56941  | C3orf37  |   |   |   |  |   |   |  | BC010125  | 2.81  | 15.82 | 61% |
| 23184  | MESDC2   |   |   |   |  |   |   |  | BC012746  | 9.11  | 16.35 | 61% |
| 123228 | SENP8    |   |   |   |  |   |   |  | NM_145204 | 23.97 | 18.17 | 61% |
| 81027  | TUBB1    |   |   |   |  |   |   |  | NM_030773 | 1.83  | 18.69 | 61% |
| 6102   | RP2      |   |   |   |  |   |   |  | BC043348  | 1.69  | 18.94 | 61% |
| 10946  | SF3A3    |   |   |   |  |   |   |  | NM_006802 | 2.39  | 20.50 | 61% |
| 4171   | MCM2     |   |   |   |  |   |   |  | NM_004526 | 2.11  | 21.55 | 61% |
| 3052   | HCCS     |   |   | Y |  |   |   |  | NM_005333 | 5.17  | 21.67 | 61% |
| 6404   | SELPLG   |   |   |   |  |   | Y |  | NM_003006 | 3.44  | 24.07 | 61% |
| 8490   | RGS5     |   |   |   |  |   |   |  | NM_003617 | 2.39  | 24.62 | 61% |
| 1326   | MAP3K8   |   |   |   |  |   |   |  | NM_005204 | 2.14  | 27.15 | 61% |
| 50488  | MINK1    |   |   |   |  |   |   |  | NM_015716 | 8.00  | 41.09 | 61% |
| 57449  | PLEKHG5  |   |   |   |  |   |   |  | BC042606  | 1.42  | 43.01 | 61% |
| 8877   | SPHK1    |   |   |   |  |   |   |  | NM_021972 | 0.39  | 79.40 | 61% |
| 81034  | SLC25A32 |   |   |   |  |   |   |  | NM_030780 | 1.47  | 81.52 | 61% |
| 9146   | HGS      |   |   |   |  |   |   |  | NM_004712 | 7.81  | 81.73 | 61% |

|        |          |   |  |   |  |  |   |           |        |         |     |
|--------|----------|---|--|---|--|--|---|-----------|--------|---------|-----|
| 9343   | EFTUD2   |   |  |   |  |  |   | BC002360  | 1.06   | 94.38   | 61% |
| 79442  | LRRC2    | Y |  |   |  |  |   | NM_024750 | 0.33   | 250.82  | 61% |
| 118812 | C10orf83 |   |  | Y |  |  |   | NM_178832 | -0.03  | 4211.26 | 56% |
| 977    | CD151    |   |  |   |  |  |   | NM_004357 | -0.42  | -207.56 | 56% |
| 2947   | GSTM3    |   |  |   |  |  |   | BC008790  | -0.53  | -202.03 | 56% |
| 2983   | GUCY1B3  |   |  |   |  |  |   | BC047620  | -1.78  | -183.18 | 56% |
| 2844   | GPR21    |   |  |   |  |  |   | NM_005294 | -0.36  | -109.00 | 56% |
| 55284  | UBE2W    |   |  |   |  |  |   | BC010900  | -0.81  | -103.28 | 56% |
| 26292  | MYCBP    |   |  |   |  |  |   | BC008686  | -1.08  | -61.24  | 56% |
| 2780   | GNAT2    |   |  |   |  |  |   | NM_005272 | -1.50  | -60.73  | 56% |
| 1794   | DOCK2    |   |  |   |  |  | Y | BC016996  | -2.00  | -45.08  | 56% |
| 5155   | PDGFB    | Y |  |   |  |  |   | NM_002608 | -5.28  | -41.12  | 56% |
| 833    | CARS     |   |  |   |  |  | Y | BC002880  | -6.97  | -34.19  | 56% |
| 1021   | CDK6     | Y |  |   |  |  |   | NM_001259 | -2.06  | -34.11  | 56% |
| 6279   | S100A8   |   |  |   |  |  |   | NM_002964 | -1.36  | -30.63  | 56% |
| 23548  | TTC33    |   |  |   |  |  |   | NM_012382 | -2.00  | -29.75  | 56% |
| 255426 | RASGEF1C |   |  |   |  |  |   | BC057759  | -3.53  | -25.59  | 56% |
| 5276   | SERPINI2 | Y |  |   |  |  |   | NM_006217 | -2.44  | -22.21  | 56% |
| 10313  | RTN3     |   |  |   |  |  | Y | NM_006054 | -2.25  | -21.34  | 56% |
| 1831   | TSC22D3  |   |  |   |  |  |   | NM_004089 | -3.61  | -21.18  | 56% |
| 26225  | ARL5A    |   |  |   |  |  |   | NM_012097 | -2.14  | -20.38  | 56% |
| 5018   | OXA1L    |   |  |   |  |  |   | BC001669  | -10.06 | -20.25  | 56% |
| 120224 | TMEM45B  |   |  |   |  |  |   | NM_138788 | -2.75  | -19.76  | 56% |
| 6301   | SARS     |   |  |   |  |  |   | BC009390  | -4.22  | -18.97  | 56% |
| 51451  | LCMT1    |   |  |   |  |  |   | BC001214  | -2.08  | -18.73  | 56% |
| 55851  | PSENIEN  |   |  |   |  |  |   | NM_172341 | -4.64  | -15.96  | 56% |
| 55888  | ZNF167   |   |  |   |  |  |   | BC010555  | -5.81  | -14.61  | 56% |
| 54443  | ANLN     |   |  |   |  |  | Y | BC034692  | -4.03  | -13.86  | 56% |
| 135114 | HINT3    |   |  |   |  |  |   | BC015732  | -7.03  | -13.64  | 56% |
| 5359   | PLSCR1   |   |  |   |  |  | Y | NM_021105 | -12.56 | -12.53  | 56% |
| 3927   | LASP1    |   |  |   |  |  | Y | BC007560  | -9.00  | -12.20  | 56% |
| 27163  | ASAH1    |   |  |   |  |  |   | NM_014435 | -17.33 | -11.63  | 56% |
| 10623  | POLR3C   |   |  |   |  |  |   | BC004424  | -10.31 | -11.32  | 56% |
| 9653   | HS2ST1   |   |  |   |  |  |   | BC025990  | -4.64  | -10.48  | 56% |
| 203569 | PAGE2    |   |  |   |  |  |   | BC054022  | -4.86  | -8.89   | 56% |
| 3038   | HAS3     |   |  |   |  |  | Y | NM_138612 | -14.25 | -8.84   | 56% |
| 197    | AHSG     |   |  |   |  |  |   | NM_001622 | -33.86 | -8.80   | 56% |
| 3430   | IFI35    |   |  |   |  |  |   | NM_005533 | -5.17  | -8.59   | 56% |
| 154    | ADRB2    |   |  |   |  |  | Y | NM_000024 | -22.31 | -8.00   | 56% |
| 25999  | CLIP3    | Y |  |   |  |  | Y | BC014486  | -16.25 | -7.59   | 56% |
| 124152 | IQCK     |   |  |   |  |  | Y | NM_153208 | -12.53 | -7.46   | 56% |
| 3145   | HMBS     |   |  |   |  |  |   | NM_000190 | -26.86 | -7.12   | 56% |
| 8406   | SRPX     |   |  |   |  |  | Y | NM_006307 | -10.53 | -6.98   | 56% |
| 2222   | FDFT1    |   |  |   |  |  |   | BC009251  | -9.67  | -6.78   | 56% |
| 6309   | SC5DL    |   |  |   |  |  |   | BC012333  | -22.97 | -6.20   | 56% |
| 51184  | ATPBD1C  |   |  |   |  |  |   | NM_016301 | -30.44 | -6.05   | 56% |
| 51265  | CDKL3    |   |  |   |  |  |   | NM_016508 | -29.08 | -5.69   | 56% |
| 25885  | POLR1A   |   |  |   |  |  |   | BC017115  | -29.67 | -5.53   | 56% |
| 10797  | MTHFD2   |   |  |   |  |  | Y | BC017054  | -49.22 | -5.52   | 56% |
| 9341   | VAMP3    |   |  |   |  |  |   | NM_004781 | -35.78 | -5.38   | 56% |
| 9130   | FAM50A   |   |  |   |  |  |   | NM_004699 | -37.22 | -5.36   | 56% |
| 27018  | NGFRAP1  |   |  |   |  |  |   | NM_014380 | -14.61 | -4.91   | 56% |



|        |          |   |   |   |  |   |   |              |         |       |     |
|--------|----------|---|---|---|--|---|---|--------------|---------|-------|-----|
| 28970  | C11orf54 |   | Y | Y |  |   |   | BC007110     | -63.67  | -4.84 | 56% |
| 134265 | AFAP1L1  | Y |   |   |  |   |   | BC040723     | -24.00  | -4.79 | 56% |
| 1043   | CD52     |   |   |   |  |   | Y | NM_001803    | -42.61  | -4.76 | 56% |
| 60686  | C14orf93 |   |   |   |  |   |   | BC014299     | -105.89 | -4.74 | 56% |
| 54908  | CCDC99   |   |   |   |  |   | Y | NM_017785    | -129.92 | -4.74 | 56% |
| 55003  | PAK1IP1  |   |   |   |  |   |   | BC010907     | -250.61 | -4.53 | 56% |
| 89927  | C16orf45 |   | Y |   |  |   |   | BC023603     | -34.61  | -4.36 | 56% |
| 27254  | CSDC2    |   | Y | Y |  |   |   | NM_014460    | -12.53  | -4.31 | 56% |
| 7045   | TGFBI    |   |   |   |  | Y | Y | NM_000358    | -17.97  | -4.25 | 56% |
| 9589   | WTAP     |   |   |   |  |   |   | NM_004906    | -150.03 | -4.21 | 56% |
| 27148  | STK36    |   |   |   |  |   |   | NM_015690    | -103.58 | -3.74 | 56% |
| 404672 | GTF2H5   |   | Y | Y |  |   |   | BC060317     | -209.19 | -3.45 | 56% |
| 80724  | ACAD10   |   |   |   |  |   |   | BC015056     | -291.78 | -3.19 | 56% |
| 5000   | ORC4L    |   |   |   |  |   |   | BC014847     | -143.11 | -2.96 | 56% |
| 3561   | IL2RG    |   |   |   |  |   | Y | NM_000206    | 29.89   | 1.42  | 56% |
| 57380  | MRS2L    |   |   | Y |  |   |   | BC001028     | 51.72   | 1.45  | 56% |
| 11100  | HNRPUL1  |   |   |   |  |   |   | BC004242     | 36.64   | 1.47  | 56% |
| 4163   | MCC      |   |   |   |  |   |   | NM_002387    | 90.64   | 1.58  | 56% |
| 9249   | DHRS3    |   |   |   |  | Y |   | NM_004753    | 23.64   | 1.60  | 56% |
| 28976  | ACAD9    |   |   |   |  |   |   | BC001817     | 36.08   | 1.63  | 56% |
| 3718   | JAK3     |   |   |   |  |   | Y | NM_000215    | 93.61   | 1.66  | 56% |
| 54851  | ANKRD49  |   |   |   |  |   |   | NM_017704    | 35.97   | 1.66  | 56% |
| 54940  | OCIAD1   |   |   |   |  |   |   | NM_017830    | 20.86   | 1.67  | 56% |
| 65264  | UBE2Z    |   |   |   |  |   |   | NM_023079    | 18.39   | 1.67  | 56% |
| 6511   | SLC1A6   |   |   |   |  |   |   | BC028721     | 42.50   | 1.68  | 56% |
| 55677  | IWS1     |   |   |   |  |   |   | BC017012     | 57.78   | 1.68  | 56% |
| 9075   | CLDN2    |   | Y | Y |  |   |   | NM_020384    | 31.78   | 1.70  | 56% |
| 57699  | CPNE5    |   |   |   |  |   | Y | BC053872     | 35.72   | 1.70  | 56% |
| 25797  | QPCT     |   |   |   |  | Y | Y | NM_012413    | 31.14   | 1.70  | 56% |
| 8879   | SGPL1    |   |   |   |  | Y |   | BC052991     | 28.72   | 1.70  | 56% |
| 3833   | KIFC1    |   |   |   |  |   |   | BC000712     | 65.72   | 1.71  | 56% |
| 51321  | AMZ2     |   |   |   |  |   |   | BC050709     | 47.78   | 1.73  | 56% |
| 3643   | INSR     |   | Y | Y |  |   |   | NM_000208    | 57.22   | 1.74  | 56% |
| 117155 | CATSPER2 |   |   |   |  |   |   | NM_054020    | 34.78   | 1.75  | 56% |
| 5053   | PAH      |   | Y | Y |  |   |   | BC026251     | 43.03   | 1.76  | 56% |
| 60343  | FAM3A    |   |   |   |  |   |   | BC008912     | 20.50   | 1.77  | 56% |
| 7965   | JTV1     |   |   |   |  |   |   | NM_006303    | 39.50   | 1.78  | 56% |
| 2947   | GSTM3    |   |   |   |  |   |   | BC008790     | 39.72   | 1.80  | 56% |
| 84549  | RBM13    |   |   |   |  |   |   | NM_032509    | 37.50   | 1.81  | 56% |
| 80790  | CMIP     |   |   |   |  |   |   | BC038113     | 36.72   | 1.82  | 56% |
| 1459   | CSNK2A2  |   |   |   |  |   |   | NM_001896    | 25.31   | 1.83  | 56% |
| 2947   | GSTM3    |   |   |   |  |   |   | BC008790     | 36.42   | 1.85  | 56% |
| 25903  | OLFML2B  |   |   |   |  |   | Y | BC047472     | 37.69   | 1.85  | 56% |
| 6342   | SCP2     |   |   |   |  |   |   | NM_001007098 | 29.78   | 1.86  | 56% |
| 115123 | Mar3     |   |   |   |  |   | Y | NM_178450    | 39.89   | 1.86  | 56% |
| 116224 | FAM122A  |   |   |   |  |   |   | NM_138333    | 85.44   | 1.86  | 56% |
| 369    | ARAF     |   |   |   |  |   |   | BC007514     | 42.75   | 1.87  | 56% |
| 51185  | CRBN     |   |   |   |  |   |   | NM_016302    | 32.94   | 1.87  | 56% |
| 64168  | EFCBP1   |   |   |   |  |   |   | BC016340     | 14.72   | 1.88  | 56% |
| 54872  | PIGG     |   |   |   |  |   |   | BC000937     | 27.11   | 1.89  | 56% |
| 7371   | UCK2     |   |   |   |  | Y | Y | BC002906     | 21.75   | 1.89  | 56% |
| 131601 | GPR175   |   |   |   |  |   |   | BC017058     | 22.39   | 1.89  | 56% |

|        |          |   |   |   |  |   |   |           |        |      |     |
|--------|----------|---|---|---|--|---|---|-----------|--------|------|-----|
| 883    | CCBL1    |   |   |   |  |   |   | BC013069  | 37.56  | 1.89 | 56% |
| 65110  | UPF3A    |   |   |   |  |   |   | BC023569  | 38.47  | 1.90 | 56% |
| 84100  | ARL6     |   |   |   |  |   |   | NM_032146 | 42.19  | 1.94 | 56% |
| 4632   | MYL1     |   |   |   |  |   |   | NM_079422 | 29.89  | 1.94 | 56% |
| 54602  | NDFIP2   |   |   |   |  | Y |   | BC026126  | 23.28  | 1.95 | 56% |
| 326624 | RAB37    |   |   |   |  |   |   | NM_175738 | 57.86  | 1.95 | 56% |
| 4811   | NID1     |   |   |   |  |   | Y | BC045606  | 12.72  | 1.97 | 56% |
| 145447 | C14orf29 |   |   |   |  |   |   | NM_181533 | 26.69  | 1.97 | 56% |
| 25     | ABL1     |   |   |   |  |   |   | NM_005157 | 47.22  | 1.99 | 56% |
| 1163   | CKS1B    |   |   |   |  |   |   | NM_001826 | 41.56  | 2.00 | 56% |
| 79026  | AHNAK    | Y |   |   |  |   |   | NM_024060 | 36.75  | 2.00 | 56% |
| 221294 | NT5DC1   |   | Y | Y |  |   |   | NM_152729 | 25.69  | 2.00 | 56% |
| 90459  | THEX1    |   |   |   |  |   | Y | NM_153332 | 319.03 | 2.01 | 56% |
| 51256  | TBC1D7   |   |   |   |  |   |   | NM_016495 | 17.67  | 2.01 | 56% |
| 80196  | RNF34    |   |   |   |  |   |   | NM_025126 | 126.17 | 2.02 | 56% |
| 5825   | ABCD3    |   |   | Y |  |   |   | BC009712  | 21.39  | 2.02 | 56% |
| 23413  | FREQ     |   |   |   |  |   |   | NM_014286 | 24.81  | 2.03 | 56% |
| 5833   | PCYT2    |   | Y | Y |  |   |   | NM_002861 | 43.36  | 2.05 | 56% |
| 79701  | FLJ22222 |   |   |   |  |   |   | BC009297  | 19.81  | 2.05 | 56% |
| 79691  | QTRTD1   |   |   |   |  |   |   | NM_024638 | 36.53  | 2.06 | 56% |
| 255919 | C16orf69 |   |   |   |  |   |   | NM_153261 | 41.92  | 2.06 | 56% |
| 55170  | PRMT6    |   |   |   |  |   |   | NM_018137 | 20.00  | 2.07 | 56% |
| 8892   | EIF2B2   |   |   |   |  |   | Y | NM_014239 | 24.86  | 2.07 | 56% |
| 55660  | PRPF40A  |   |   |   |  |   |   | BC027178  | 15.97  | 2.07 | 56% |
| 29789  | GTPBP9   |   |   |   |  |   |   | BC012842  | 18.00  | 2.08 | 56% |
| 8835   | SOCS2    |   |   |   |  |   |   | NM_003877 | 30.17  | 2.08 | 56% |
| 6094   | ROM1     | Y |   |   |  |   |   | NM_000327 | 45.78  | 2.08 | 56% |
| 4597   | MVD      |   |   |   |  |   |   | NM_002461 | 63.50  | 2.09 | 56% |
| 4214   | MAP3K1   |   |   |   |  |   |   | XM_042066 | 13.58  | 2.09 | 56% |
| 7050   | TGIF1    |   |   |   |  |   |   | NM_003244 | 20.17  | 2.09 | 56% |
| 3772   | KCNJ15   |   | Y | Y |  |   |   | NM_002243 | 18.92  | 2.10 | 56% |
| 2719   | GPC3     |   |   |   |  |   |   | BC035972  | 25.75  | 2.11 | 56% |
| 2670   | GFAP     |   |   |   |  |   |   | NM_002055 | 51.50  | 2.11 | 56% |
| 79188  | TMEM43   |   |   |   |  |   |   | BC011719  | 35.19  | 2.12 | 56% |
| 362    | AQP5     |   |   |   |  |   |   | NM_001651 | 25.58  | 2.12 | 56% |
| 1429   | CRYZ     |   |   | Y |  |   |   | NM_001889 | 62.42  | 2.12 | 56% |
| 5333   | PLCD1    |   |   |   |  |   |   | NM_006225 | 20.78  | 2.13 | 56% |
| 317671 | RFESD    |   |   |   |  |   |   | NM_173362 | 42.58  | 2.13 | 56% |
| 25865  | PRKD2    |   |   |   |  |   |   | NM_016457 | 22.61  | 2.13 | 56% |
| 57143  | ADCK1    |   |   |   |  |   |   | BC058906  | 25.17  | 2.13 | 56% |
| 1874   | E2F4     |   |   |   |  |   |   | NM_001950 | 44.97  | 2.13 | 56% |
| 23705  | CADM1    |   |   |   |  | Y |   | BC047021  | 39.53  | 2.13 | 56% |
| 9623   | TCL1B    |   |   |   |  |   | Y | BC051000  | 44.19  | 2.14 | 56% |
| 83590  | TMUB1    |   |   |   |  |   |   | NM_031434 | 39.31  | 2.14 | 56% |
| 84649  | DGAT2    |   |   |   |  |   | Y | NM_032564 | 18.03  | 2.14 | 56% |
| 4154   | MBNL1    |   |   |   |  |   |   | NM_021038 | 19.06  | 2.15 | 56% |
| 10972  | TMED10   |   |   |   |  |   |   | NM_006827 | 36.53  | 2.15 | 56% |
| 3267   | HRB      |   |   |   |  |   |   | BC030592  | 87.72  | 2.16 | 56% |
| 5025   | P2RX4    |   |   |   |  |   |   | BC033826  | 15.28  | 2.16 | 56% |
| 10695  | TNRC5    |   |   |   |  |   |   | NM_006586 | 24.72  | 2.16 | 56% |
| 2104   | ESRRG    |   |   |   |  |   |   | BC064700  | 22.61  | 2.17 | 56% |
| 9572   | NR1D1    |   |   |   |  |   | Y | BC056148  | 24.31  | 2.17 | 56% |

|        |          |   |   |   |   |  |   |   |           |       |      |     |
|--------|----------|---|---|---|---|--|---|---|-----------|-------|------|-----|
| 3156   | HMGCR    |   |   |   |   |  |   |   | BC033692  | 26.44 | 2.17 | 56% |
| 2705   | GJB1     |   |   |   |   |  |   |   | NM_000166 | 38.44 | 2.17 | 56% |
| 8666   | EIF3S4   |   |   |   |   |  |   |   | BC000733  | 81.42 | 2.18 | 56% |
| 6322   | SCML1    |   |   |   |   |  |   |   | NM_006746 | 30.36 | 2.18 | 56% |
| 55611  | OTUB1    |   |   |   |   |  |   |   | BC010368  | 15.67 | 2.18 | 56% |
| 1198   | CLK3     |   |   |   |   |  |   |   | BC002555  | 58.03 | 2.19 | 56% |
| 51205  | ACP6     |   |   |   |   |  |   | Y | NM_016361 | 16.14 | 2.19 | 56% |
| 5160   | PDHA1    |   |   |   |   |  |   |   | NM_000284 | 27.64 | 2.19 | 56% |
| 51248  | PDZD11   |   |   |   |   |  |   |   | NM_016484 | 29.03 | 2.20 | 56% |
| 56893  | UBQLN4   |   |   |   |   |  |   |   | BC006410  | 22.61 | 2.20 | 56% |
| 1152   | CKB      |   |   |   |   |  |   |   | NM_001823 | 27.56 | 2.20 | 56% |
| 1198   | CLK3     |   |   |   |   |  |   |   | BC002555  | 73.97 | 2.22 | 56% |
| 80273  | GRPEL1   |   |   |   |   |  |   |   | NM_025196 | 27.50 | 2.22 | 56% |
| 11284  | PNKP     |   |   |   |   |  |   |   | NM_007254 | 25.64 | 2.22 | 56% |
| 7417   | VDAC2    |   |   |   |   |  | Y |   | BC012883  | 22.69 | 2.22 | 56% |
| 8767   | RIPK2    |   |   |   |   |  |   |   | NM_003821 | 25.61 | 2.22 | 56% |
| 859    | CAV3     |   |   |   |   |  |   |   | NM_001234 | 23.33 | 2.22 | 56% |
| 115827 | RAB3C    |   |   |   |   |  |   |   | NM_138453 | 48.11 | 2.23 | 56% |
| 4782   | NFIC     |   |   |   |   |  |   |   | BC012120  | 14.89 | 2.24 | 56% |
| 875    | CBS      |   |   |   |   |  | Y |   | NM_000071 | 20.36 | 2.24 | 56% |
| 987    | LRBA     |   |   |   |   |  |   |   | BC012535  | 27.89 | 2.25 | 56% |
| 64400  | AKTIP    |   |   |   |   |  |   |   | NM_022476 | 24.42 | 2.25 | 56% |
| 23604  | DAPK2    | Y |   |   |   |  |   |   | NM_014326 | 20.61 | 2.25 | 56% |
| 79614  | C5orf23  | Y | Y | Y |   |  |   |   | NM_024563 | 28.75 | 2.26 | 56% |
| 5597   | MAPK6    |   |   |   |   |  |   |   | NM_002748 | 33.06 | 2.26 | 56% |
| 8776   | MTMR1    |   |   |   |   |  |   |   | BC011250  | 46.06 | 2.26 | 56% |
| 301    | ANXA1    |   |   |   |   |  |   |   | NM_000700 | 28.92 | 2.26 | 56% |
| 54898  | ELOVL2   |   |   |   |   |  |   |   | BC060809  | 9.39  | 2.26 | 56% |
| 195814 | RDHE2    |   |   |   |   |  |   |   | BC037219  | 22.75 | 2.26 | 56% |
| 10486  | CAP2     |   |   |   |   |  |   | Y | NM_006366 | 18.00 | 2.26 | 56% |
| 121665 | UNQ1887  |   |   |   |   |  |   |   | BC025781  | 23.36 | 2.26 | 56% |
| 5592   | PRKG1    | Y |   |   |   |  |   | Y | BC062688  | 12.72 | 2.27 | 56% |
| 27252  | KLHL20   |   |   |   |   |  |   |   | BC005253  | 40.72 | 2.27 | 56% |
| 5128   | PCTK2    |   |   |   |   |  |   |   | BC033005  | 15.44 | 2.27 | 56% |
| 23178  | PASK     |   |   |   |   |  |   |   | NM_015148 | 52.00 | 2.27 | 56% |
| 54970  | TTC12    |   |   |   |   |  |   |   | NM_017868 | 47.81 | 2.27 | 56% |
| 10144  | FAM13A1  |   |   |   |   |  |   |   | BC063126  | 24.31 | 2.28 | 56% |
| 7421   | VDR      |   |   |   | Y |  |   |   | NM_000376 | 12.61 | 2.29 | 56% |
| 54994  | C20orf11 |   |   |   |   |  |   |   | BC032120  | 24.56 | 2.29 | 56% |
| 57787  | MARK4    |   |   |   |   |  |   |   | NM_031417 | 98.94 | 2.30 | 56% |
| 51338  | MS4A4A   |   |   |   |   |  |   | Y | NM_148975 | 74.75 | 2.30 | 56% |
| 84696  | ABHD1    |   |   |   |   |  |   |   | BC039576  | 28.00 | 2.30 | 56% |
| 23204  | ARL6IP1  |   |   |   |   |  |   |   | NM_015161 | 28.31 | 2.30 | 56% |
| 10244  | RABEPK   |   |   |   |   |  |   |   | BC047023  | 34.28 | 2.31 | 56% |
| 10238  | WDR68    |   |   |   |   |  |   |   | NM_005828 | 37.25 | 2.31 | 56% |
| 57104  | PNPLA2   |   |   |   |   |  |   |   | NM_020376 | 41.97 | 2.31 | 56% |
| 27306  | PGDS     |   |   |   |   |  |   | Y | NM_014485 | 50.92 | 2.31 | 56% |
| 55002  | TMCO3    |   |   |   |   |  |   |   | BC012564  | 20.86 | 2.31 | 56% |
| 84517  | ARPM1    |   |   |   |   |  |   |   | BC007289  | 21.33 | 2.32 | 56% |
| 6237   | RRAS     |   | Y | Y |   |  |   |   | NM_006270 | 24.36 | 2.32 | 56% |
| 445    | ASS1     |   | Y | Y |   |  |   |   | NM_054012 | 27.44 | 2.32 | 56% |
| 8733   | GPA1     |   |   |   |   |  |   |   | NM_003801 | 20.36 | 2.32 | 56% |

|        |           |   |   |   |  |   |   |           |       |      |     |
|--------|-----------|---|---|---|--|---|---|-----------|-------|------|-----|
| 58528  | RRAGD     |   | Y |   |  |   |   | BC003088  | 14.83 | 2.32 | 56% |
| 147906 | DACT3     |   |   |   |  |   | Y | BC034052  | 35.50 | 2.33 | 56% |
| 5535   | PPP3R2    |   |   |   |  |   |   | NM_147180 | 24.94 | 2.33 | 56% |
| 84326  | MGC13114  |   |   |   |  |   |   | BC007207  | 18.39 | 2.33 | 56% |
| 55240  | STEAP3    |   |   |   |  |   | Y | BC042150  | 32.39 | 2.33 | 56% |
| 84498  | FAM120B   |   |   |   |  |   |   | NM_032448 | 50.86 | 2.34 | 56% |
| 2319   | FLOT2     |   |   |   |  |   |   | NM_004475 | 17.44 | 2.34 | 56% |
| 51566  | ARMCX3    |   |   |   |  |   |   | NM_016607 | 21.19 | 2.34 | 56% |
| 90826  | LOC90826  |   |   |   |  |   |   | BC021250  | 19.33 | 2.34 | 56% |
| 8503   | PIK3R3    |   |   |   |  |   |   | BC021622  | 18.33 | 2.34 | 56% |
| 6252   | RTN1      |   |   |   |  |   |   | NM_206852 | 32.78 | 2.34 | 56% |
| 8522   | GAS7      |   |   |   |  |   |   | BC001152  | 42.19 | 2.34 | 56% |
| 84545  | MRPL43    |   |   |   |  |   |   | BC052639  | 18.81 | 2.35 | 56% |
| 8623   | ASMTL     |   |   |   |  |   |   | BC010089  | 25.33 | 2.35 | 56% |
| 51074  | APIP      |   |   |   |  |   |   | BC009077  | 18.92 | 2.36 | 56% |
| 23468  | CBX5      |   |   |   |  |   |   | NM_012117 | 37.53 | 2.36 | 56% |
| 59     | ACTA2     |   |   |   |  |   | Y | NM_001613 | 29.56 | 2.37 | 56% |
| 55848  | C9orf46   |   |   |   |  |   |   | BC008212  | 41.69 | 2.37 | 56% |
| 54953  | C1orf27   |   |   |   |  |   |   | BC003397  | 29.11 | 2.37 | 56% |
| 11051  | NUDT21    |   |   |   |  |   |   | NM_007006 | 36.53 | 2.37 | 56% |
| 8723   | SNX4      |   | Y |   |  |   |   | NM_003794 | 15.97 | 2.37 | 56% |
| 9205   | ZMYM5     |   |   |   |  |   |   | BC007048  | 22.83 | 2.38 | 56% |
| 51373  | MRPS17    |   |   |   |  |   |   | BC054031  | 67.39 | 2.38 | 56% |
| 84930  | MASTL     |   |   |   |  |   |   | NM_032844 | 28.89 | 2.38 | 56% |
| 55132  | LARP2     |   |   |   |  | Y |   | BC030516  | 48.50 | 2.38 | 56% |
| 8530   | CST7      |   |   |   |  |   | Y | NM_003650 | 13.94 | 2.39 | 56% |
| 56287  | GKN1      |   |   |   |  |   |   | NM_019617 | 27.06 | 2.39 | 56% |
| 11021  | RAB35     |   |   |   |  |   |   | NM_006861 | 73.94 | 2.39 | 56% |
| 64795  | RMND5A    |   |   |   |  |   |   | NM_022780 | 10.81 | 2.39 | 56% |
| 140700 | SAMD10    |   |   |   |  |   |   | NM_080621 | 54.00 | 2.41 | 56% |
| 348487 | C1orf117  | Y | Y | Y |  |   |   | NM_182623 | 71.53 | 2.41 | 56% |
| 84277  | WBSCR18   |   |   |   |  |   |   | BC005056  | 46.67 | 2.41 | 56% |
| 1158   | CKM       |   |   |   |  |   |   | BC007462  | 40.03 | 2.41 | 56% |
| 55835  | CENPJ     |   |   |   |  |   |   | BC024209  | 23.17 | 2.41 | 56% |
| 203    | AK1       |   |   |   |  |   |   | BC001116  | 23.50 | 2.41 | 56% |
| 115708 | C14orf172 |   |   |   |  |   |   | BC010167  | 21.67 | 2.42 | 56% |
| 85465  | SELI      |   |   |   |  |   |   | BC021229  | 28.19 | 2.42 | 56% |
| 83593  | RASSF5    |   |   |   |  |   | Y | NM_182665 | 25.58 | 2.42 | 56% |
| 23527  | CENTB2    |   |   |   |  |   |   | BC060767  | 22.72 | 2.42 | 56% |
| 7355   | SLC35A2   |   |   |   |  |   |   | BC035747  | 23.08 | 2.43 | 56% |
| 343035 | RD3       |   |   |   |  |   |   | NM_183059 | 37.47 | 2.44 | 56% |
| 56947  | C2orf33   |   |   |   |  |   |   | BC000797  | 43.92 | 2.44 | 56% |
| 203259 | C9orf25   |   |   |   |  |   |   | BC041009  | 37.86 | 2.44 | 56% |
| 80347  | COASY     |   |   |   |  |   |   | BC020985  | 69.06 | 2.46 | 56% |
| 10424  | PGRMC2    |   |   |   |  |   |   | NM_006320 | 30.56 | 2.46 | 56% |
| 514    | ATP5E     |   |   |   |  |   |   | NM_006886 | 15.44 | 2.46 | 56% |
| 55142  | CEP27     |   |   |   |  |   |   | NM_018097 | 28.92 | 2.47 | 56% |
| 5587   | PRKD1     |   |   |   |  |   |   | NM_002742 | 20.08 | 2.48 | 56% |
| 3033   | HADH      |   | Y | Y |  |   |   | BC000306  | 42.14 | 2.48 | 56% |
| 83478  | ARHGAP24  |   |   |   |  |   |   | BC047918  | 20.56 | 2.49 | 56% |
| 7030   | TFE3      |   |   |   |  |   |   | NM_006521 | 57.56 | 2.49 | 56% |
| 6948   | TCN2      |   | Y | Y |  |   |   | BC011239  | 13.42 | 2.49 | 56% |

|        |           |   |   |   |   |   |   |  |           |        |      |     |
|--------|-----------|---|---|---|---|---|---|--|-----------|--------|------|-----|
| 150290 | DUSP18    |   |   |   |   |   |   |  | BC028724  | 38.97  | 2.50 | 56% |
| 57142  | RTN4      |   |   |   |   |   |   |  | NM_007008 | 60.33  | 2.50 | 56% |
| 162427 | LOC162427 |   |   |   |   |   |   |  | NM_178126 | 25.19  | 2.52 | 56% |
| 3300   | DNAJB2    |   |   |   |   |   |   |  | BC047056  | 24.06  | 2.52 | 56% |
| 51086  | TNNI3K    |   |   |   |   |   |   |  | NM_015978 | 22.72  | 2.52 | 56% |
| 1723   | DHODH     |   |   |   |   |   |   |  | NM_001361 | 14.39  | 2.52 | 56% |
| 26751  | SH3YL1    |   |   |   |   |   |   |  | BC008375  | 93.47  | 2.53 | 56% |
| 51107  | APH1A     |   |   |   |   |   |   |  | BC001230  | 15.72  | 2.53 | 56% |
| 7318   | UBE1L     | Y |   |   |   |   |   |  | NM_003335 | 28.14  | 2.53 | 56% |
| 712    | C1QA      |   |   |   |   |   | Y |  | NM_015991 | 18.58  | 2.53 | 56% |
| 8612   | PPAP2C    |   |   |   |   |   | Y |  | NM_003712 | 10.58  | 2.53 | 56% |
| 9731   | KIAA0562  |   |   |   |   |   |   |  | BC050721  | 27.64  | 2.54 | 56% |
| 81629  | TSSK3     |   |   |   |   |   |   |  | NM_052841 | 27.94  | 2.54 | 56% |
| 10769  | PLK2      |   |   |   |   |   |   |  | BC013879  | 31.47  | 2.55 | 56% |
| 28951  | TRIB2     |   |   |   |   |   |   |  | NM_021643 | 32.92  | 2.56 | 56% |
| 6223   | RPS19     |   |   |   |   |   | Y |  | NM_001022 | 145.56 | 2.56 | 56% |
| 3055   | HCK       |   |   |   |   |   |   |  | BC014435  | 19.81  | 2.57 | 56% |
| 9356   | SLC22A6   | Y | Y | Y |   |   |   |  | NM_153276 | 40.75  | 2.57 | 56% |
| 150483 | TEKT4     |   |   |   |   |   |   |  | NM_144705 | 11.47  | 2.58 | 56% |
| 9262   | STK17B    |   |   |   |   |   | Y |  | NM_004226 | 41.92  | 2.59 | 56% |
| 28951  | TRIB2     |   |   |   |   |   |   |  | NM_021643 | 20.75  | 2.60 | 56% |
| 64116  | SLC39A8   |   | Y |   |   |   |   |  | NM_022154 | 20.92  | 2.60 | 56% |
| 705    | BYSL      |   |   |   |   |   | Y |  | BC007340  | 21.25  | 2.60 | 56% |
| 10516  | FBLN5     |   |   |   |   |   |   |  | NM_006329 | 35.86  | 2.60 | 56% |
| 9519   | TBPL1     |   |   |   |   |   |   |  | BC000381  | 23.00  | 2.61 | 56% |
| 10585  | POMT1     |   |   |   |   |   |   |  | BC065268  | 15.44  | 2.61 | 56% |
| 389336 | MGC23985  |   |   |   |   |   |   |  | BC021680  | 19.44  | 2.61 | 56% |
| 57471  | KIAA1189  |   |   |   |   |   |   |  | BC026345  | 12.14  | 2.61 | 56% |
| 5756   | TWF1      |   |   |   |   |   |   |  | BC022344  | 26.56  | 2.62 | 56% |
| 84881  | RPUSD4    |   |   |   |   |   |   |  | BC014131  | 13.17  | 2.63 | 56% |
| 286343 | C9orf150  |   |   |   |   |   |   |  | BC036923  | 44.44  | 2.63 | 56% |
| 2252   | FGF7      |   |   |   |   |   | Y |  | NM_002009 | 17.14  | 2.63 | 56% |
| 58495  | OVOL2     |   |   |   |   |   |   |  | BC006148  | 17.31  | 2.63 | 56% |
| 28973  | MRPS18B   |   |   |   |   |   |   |  | NM_014046 | 30.47  | 2.64 | 56% |
| 56852  | RAD18     |   |   |   |   |   | Y |  | NM_020165 | 18.06  | 2.64 | 56% |
| 7534   | YWHAZ     |   |   |   |   |   |   |  | NM_003406 | 13.81  | 2.65 | 56% |
| 4720   | NDUFS2    |   |   |   |   |   |   |  | NM_004550 | 16.47  | 2.65 | 56% |
| 4236   | MFAP1     |   |   |   |   |   |   |  | NM_005926 | 61.11  | 2.65 | 56% |
| 55061  | SUSD4     |   |   |   | Y | Y |   |  | BC004888  | 13.64  | 2.65 | 56% |
| 90624  | LYRM7     |   |   |   |   |   |   |  | BC022429  | 103.92 | 2.66 | 56% |
| 64781  | CERK      |   | Y | Y |   |   |   |  | NM_182661 | 14.31  | 2.66 | 56% |
| 84545  | MRPL43    |   |   |   |   |   |   |  | BC052639  | 35.22  | 2.66 | 56% |
| 7104   | TM4SF4    |   |   |   |   |   |   |  | NM_004617 | 12.72  | 2.66 | 56% |
| 118980 | SFXN2     |   |   | Y |   |   | Y |  | NM_178858 | 19.86  | 2.66 | 56% |
| 3015   | H2AFZ     |   |   |   |   |   |   |  | NM_002106 | 18.69  | 2.66 | 56% |
| 51022  | GLRX2     |   |   |   |   |   |   |  | BC028113  | 28.75  | 2.67 | 56% |
| 2512   | FTL       |   | Y | Y |   |   |   |  | BC013928  | 46.47  | 2.67 | 56% |
| 5468   | PPARG     |   |   |   |   |   | Y |  | NM_015869 | 24.25  | 2.68 | 56% |
| 3290   | HSD11B1   |   |   |   |   |   |   |  | NM_005525 | 15.14  | 2.68 | 56% |
| 55193  | PB1       |   |   |   |   |   |   |  | BC015323  | 21.75  | 2.68 | 56% |
| 308    | ANXA5     |   |   |   |   |   |   |  | NM_001154 | 19.08  | 2.69 | 56% |
| 3702   | ITK       |   |   |   |   |   | Y |  | NM_005546 | 40.58  | 2.69 | 56% |

|        |              |   |   |   |  |   |   |  |           |        |      |     |
|--------|--------------|---|---|---|--|---|---|--|-----------|--------|------|-----|
| 23760  | PITPNB       |   |   |   |  |   |   |  | BC031427  | 25.81  | 2.70 | 56% |
| 396    | ARHGDI A     |   |   |   |  |   |   |  | NM_004309 | 31.78  | 2.71 | 56% |
| 64924  | SLC30A5      |   |   |   |  |   |   |  | NM_024055 | 23.06  | 2.71 | 56% |
| 23259  | DDHD2        |   |   |   |  |   |   |  | BC010504  | 18.33  | 2.71 | 56% |
| 2045   | EPHA7        |   |   |   |  |   |   |  | NM_004440 | 124.25 | 2.71 | 56% |
| 23650  | TRIM29       |   |   |   |  | Y | Y |  | NM_012101 | 34.83  | 2.71 | 56% |
| 64799  | IQCH         |   |   |   |  |   |   |  | BC031041  | 24.72  | 2.71 | 56% |
| 11322  | TMC6         |   |   |   |  | Y |   |  | BC007766  | 28.39  | 2.72 | 56% |
| 64771  | C6orf106     |   |   |   |  |   |   |  | NM_022758 | 28.94  | 2.72 | 56% |
| 11120  | BTN2A1       |   |   |   |  |   |   |  | NM_078476 | 13.06  | 2.73 | 56% |
| 5906   | RAP1A        |   |   |   |  |   | Y |  | NM_002884 | 15.75  | 2.73 | 56% |
| 23119  | HIC2         | Y |   |   |  |   |   |  | BC009207  | 20.75  | 2.73 | 56% |
| 1117   | CHI3L2       |   |   |   |  |   | Y |  | BC011460  | 18.67  | 2.74 | 56% |
| 6449   | SGTA         |   |   |   |  |   |   |  | NM_003021 | 14.83  | 2.74 | 56% |
| 26273  | FBXO3        |   |   |   |  |   |   |  | NM_012175 | 59.89  | 2.74 | 56% |
| 54981  | C9orf95      |   |   |   |  |   |   |  | NM_017881 | 15.72  | 2.74 | 56% |
| 919    | CD247        |   |   |   |  |   | Y |  | BC025703  | 39.36  | 2.74 | 56% |
| 2553   | GABPB2       |   |   |   |  | Y |   |  | NM_005254 | 24.47  | 2.74 | 56% |
| 8814   | CDKL1        |   |   |   |  |   |   |  | NM_004196 | 54.50  | 2.74 | 56% |
| 115106 | CCDC5        |   |   |   |  |   |   |  | NM_138443 | 14.67  | 2.75 | 56% |
| 23555  | TSPAN15      |   |   |   |  |   |   |  | NM_012339 | 17.06  | 2.75 | 56% |
| 53834  | FGFRL1       |   |   |   |  |   |   |  | BC013955  | 28.69  | 2.76 | 56% |
| 2050   | EPHB4        |   |   |   |  |   |   |  | NM_004444 | 13.94  | 2.76 | 56% |
| 51755  | CRKRS        |   |   |   |  |   |   |  | NM_016507 | 26.64  | 2.76 | 56% |
| 8738   | CRADD        |   |   |   |  |   |   |  | NM_003805 | 24.69  | 2.77 | 56% |
| 90871  | C9orf123     |   |   |   |  |   |   |  | BC009510  | 19.72  | 2.77 | 56% |
| 9617   | MTRF1        |   |   |   |  |   |   |  | BC027731  | 29.42  | 2.78 | 56% |
| 83707  | TRPT1        |   |   |   |  |   |   |  | NM_031472 | 29.81  | 2.79 | 56% |
| 51535  | PPHLN1       |   |   |   |  |   |   |  | BC039832  | 25.50  | 2.79 | 56% |
| 9412   | SURB7        |   |   |   |  |   |   |  | NM_004264 | 16.14  | 2.79 | 56% |
| 63899  | NSUN3        |   |   |   |  |   |   |  | BC020602  | 11.03  | 2.80 | 56% |
| 230    | ALDOC        |   |   |   |  |   |   |  | NM_005165 | 23.58  | 2.81 | 56% |
| 7353   | UFD1L        |   |   |   |  |   |   |  | NM_005659 | 17.17  | 2.81 | 56% |
| 3150   | HMG N1       |   |   |   |  |   |   |  | NM_004965 | 14.47  | 2.81 | 56% |
| 5429   | POLH         |   |   |   |  |   |   |  | BC015742  | 25.94  | 2.81 | 56% |
| 56650  | CLDND1       |   |   |   |  |   |   |  | NM_019895 | 11.06  | 2.82 | 56% |
| 60496  | AASDHPPT     |   |   |   |  |   |   |  | NM_015423 | 25.11  | 2.83 | 56% |
| 220164 | DOK6         |   |   |   |  |   |   |  | BC019045  | 30.25  | 2.83 | 56% |
| 5083   | PAX9         |   |   |   |  |   |   |  | NM_006194 | 21.50  | 2.83 | 56% |
| 10464  | C13orf24     |   |   |   |  |   |   |  | BC051911  | 25.03  | 2.84 | 56% |
| 5970   | RELA         |   |   |   |  |   |   |  | BC011603  | 39.86  | 2.84 | 56% |
| 91050  | DKFZp761B107 |   |   |   |  |   |   |  | BC067735  | 191.69 | 2.85 | 56% |
| 6283   | S100A12      | Y |   |   |  |   |   |  | NM_005621 | 18.72  | 2.85 | 56% |
| 123803 | NTAN1        |   |   |   |  |   | Y |  | NM_173474 | 33.14  | 2.85 | 56% |
| 55744  | C7orf44      |   |   |   |  |   |   |  | BC001743  | 15.44  | 2.86 | 56% |
| 5032   | P2RY11       |   |   |   |  |   |   |  | BC009877  | 13.86  | 2.87 | 56% |
| 2940   | GSTA3        | Y | Y | Y |  |   |   |  | BC020619  | 21.97  | 2.87 | 56% |
| 113277 | TMEM106A     |   | Y | Y |  |   |   |  | NM_145041 | 17.81  | 2.87 | 56% |
| 6517   | SLC2A4       |   |   |   |  |   |   |  | NM_001042 | 10.86  | 2.88 | 56% |
| 64077  | LHPP         |   |   |   |  |   |   |  | BC007324  | 24.69  | 2.88 | 56% |
| 192286 | HIGD2A       |   |   |   |  |   |   |  | NM_138820 | 29.03  | 2.88 | 56% |
| 214    | ALCAM        |   |   |   |  |   |   |  | BC057809  | 27.67  | 2.88 | 56% |

|        |            |   |   |   |  |   |   |  |           |        |      |     |
|--------|------------|---|---|---|--|---|---|--|-----------|--------|------|-----|
| 168090 | C6orf118   |   |   |   |  |   |   |  | NM_144980 | 34.86  | 2.90 | 56% |
| 5015   | OTX2       |   |   |   |  |   |   |  | NM_021728 | 27.89  | 2.90 | 56% |
| 89927  | C16orf45   |   | Y |   |  |   |   |  | BC023603  | 10.89  | 2.90 | 56% |
| 64092  | SAMSN1     |   |   |   |  | Y | Y |  | BC029112  | 18.86  | 2.90 | 56% |
| 493869 | LOC493869  |   |   |   |  | Y | Y |  | BC029424  | 11.31  | 2.90 | 56% |
| 3257   | HPS1       |   |   |   |  |   |   |  | BC000175  | 21.69  | 2.91 | 56% |
| 284942 | MGC70863   |   |   |   |  |   |   |  | BC010172  | 14.56  | 2.92 | 56% |
| 8846   | ALKBH1     |   |   |   |  |   |   |  | BC025787  | 18.28  | 2.93 | 56% |
| 148113 | CILP2      |   |   |   |  |   |   |  | BC034926  | 16.61  | 2.93 | 56% |
| 6809   | STX3       |   |   |   |  |   |   |  | NM_004177 | 20.61  | 2.94 | 56% |
| 84333  | PCGF5      |   |   |   |  |   |   |  | NM_032373 | 29.72  | 2.95 | 56% |
| 2907   | GRINA      |   |   | Y |  |   |   |  | BC041788  | 11.78  | 2.96 | 56% |
| 2157   | F8         | Y |   |   |  |   |   |  | NM_019863 | 8.44   | 2.96 | 56% |
| 10951  | CBX1       |   |   |   |  |   |   |  | NM_006807 | 49.67  | 2.97 | 56% |
| 203328 | SUSD3      |   | Y | Y |  |   |   |  | NM_145006 | 27.19  | 3.00 | 56% |
| 1796   | DOK1       |   |   |   |  |   |   |  | NM_001381 | 40.50  | 3.00 | 56% |
| 55211  | DPPA4      |   |   |   |  |   |   |  | NM_018189 | 23.64  | 3.00 | 56% |
| 64135  | IFIH1      |   |   |   |  |   |   |  | BC046208  | 35.64  | 3.00 | 56% |
| 54552  | GNL3L      |   |   |   |  |   |   |  | NM_019067 | 19.47  | 3.01 | 56% |
| 11161  | C14orf1    |   |   |   |  |   |   |  | NM_007176 | 23.64  | 3.01 | 56% |
| 79446  | WDR25      |   |   |   |  |   |   |  | NM_024515 | 15.36  | 3.01 | 56% |
| 54842  | FLJ20160   |   |   |   |  |   |   |  | BC050537  | 16.67  | 3.02 | 56% |
| 254427 | C10orf47   |   |   |   |  |   |   |  | BC017269  | 18.36  | 3.02 | 56% |
| 79608  | RIC3       |   | Y |   |  |   |   |  | NM_024557 | 17.33  | 3.03 | 56% |
| 25945  | PVRL3      |   |   |   |  |   |   |  | BC017572  | 16.78  | 3.03 | 56% |
| 4194   | MDM4       |   |   |   |  |   |   |  | BC067299  | 9.81   | 3.04 | 56% |
| 57595  | PDZD4      |   |   |   |  |   |   |  | BC002606  | 48.64  | 3.05 | 56% |
| 23647  | ARFIP2     |   |   |   |  |   |   |  | NM_012402 | 35.92  | 3.05 | 56% |
| 80270  | HSD3B7     |   |   |   |  |   |   |  | NM_025193 | 15.50  | 3.05 | 56% |
| 1399   | CRKL       |   |   |   |  |   |   |  | NM_005207 | 65.17  | 3.08 | 56% |
| 5049   | PAFAH1B2   |   |   |   |  |   |   |  | NM_002572 | 22.06  | 3.08 | 56% |
| 3659   | IRF1       |   |   |   |  |   |   |  | NM_002198 | 14.31  | 3.08 | 56% |
| 26751  | SH3YL1     |   |   |   |  |   |   |  | BC008375  | 16.33  | 3.09 | 56% |
| 8985   | PLOD3      |   |   |   |  |   |   |  | NM_001084 | 21.83  | 3.09 | 56% |
| 140609 | NEK7       | Y |   |   |  |   |   |  | NM_133494 | 198.31 | 3.10 | 56% |
| 55147  | RBM23      |   |   |   |  |   |   |  | NM_018107 | 116.75 | 3.10 | 56% |
| 8078   | USP5       |   |   |   |  |   |   |  | BC005139  | 20.97  | 3.10 | 56% |
| 90480  | GADD45GIP1 |   |   |   |  |   |   |  | BC013039  | 23.75  | 3.10 | 56% |
| 3692   | ITGB4BP    |   |   |   |  |   |   |  | NM_181468 | 15.33  | 3.11 | 56% |
| 51000  | SLC35B3    |   |   |   |  | Y |   |  | NM_015948 | 22.44  | 3.11 | 56% |
| 334    | APLP2      |   |   |   |  |   |   |  | BC004371  | 19.72  | 3.12 | 56% |
| 57226  | LYRM2      |   |   |   |  |   |   |  | NM_020466 | 12.19  | 3.12 | 56% |
| 79982  | DNAJB14    |   |   |   |  |   |   |  | BC022248  | 10.61  | 3.12 | 56% |
| 84196  | USP48      |   |   |   |  |   | Y |  | BC013567  | 12.67  | 3.12 | 56% |
| 11066  | U1SNRNPBP  |   |   |   |  |   |   |  | BC054034  | 17.33  | 3.13 | 56% |
| 51031  | C17orf25   |   |   |   |  |   |   |  | BC015848  | 49.67  | 3.13 | 56% |
| 23406  | COTL1      |   |   | Y |  |   |   |  | NM_021149 | 57.44  | 3.14 | 56% |
| 10907  | TXNL4A     |   |   |   |  |   |   |  | NM_006701 | 87.08  | 3.14 | 56% |
| 55218  | EXDL2      |   |   |   |  |   |   |  | NM_018199 | 9.61   | 3.14 | 56% |
| 51318  | MRPL35     |   |   |   |  |   |   |  | BC020651  | 18.06  | 3.14 | 56% |
| 152110 | NEK10      |   |   |   |  |   |   |  | BC045758  | 17.53  | 3.14 | 56% |
| 27128  | PSCD4      |   |   |   |  |   | Y |  | NM_013385 | 15.83  | 3.15 | 56% |

|        |           |   |   |   |  |   |   |           |       |      |     |
|--------|-----------|---|---|---|--|---|---|-----------|-------|------|-----|
| 567    | B2M       | Y |   |   |  |   |   | BC032589  | 8.36  | 3.16 | 56% |
| 84457  | PHYHIPL   |   |   |   |  | Y |   | NM_032439 | 13.08 | 3.18 | 56% |
| 9194   | SLC16A7   |   |   |   |  | Y |   | BC030693  | 20.14 | 3.20 | 56% |
| 1455   | CSNK1G2   |   |   |   |  |   |   | BC020972  | 36.67 | 3.20 | 56% |
| 5581   | PRKCE     | Y |   | Y |  |   |   | NM_005400 | 15.92 | 3.20 | 56% |
| 54332  | GDAP1     |   |   |   |  |   |   | BC024939  | 22.28 | 3.21 | 56% |
| 7458   | EIF4H     |   |   |   |  |   |   | NM_031992 | 18.47 | 3.22 | 56% |
| 11333  | PDAP1     |   |   |   |  |   |   | NM_014891 | 24.11 | 3.22 | 56% |
| 50855  | PARD6A    |   |   |   |  |   |   | BC015626  | 22.28 | 3.23 | 56% |
| 494143 | CHAC2     |   |   |   |  |   |   | BC019239  | 10.33 | 3.23 | 56% |
| 64792  | RABL5     |   |   |   |  |   |   | NM_022777 | 11.64 | 3.23 | 56% |
| 1195   | CLK1      |   |   |   |  |   |   | NM_004071 | 12.64 | 3.25 | 56% |
| 1288   | COL4A6    |   |   |   |  |   |   | BC070203  | 17.06 | 3.25 | 56% |
| 23464  | GCAT      |   | Y |   |  |   |   | BC014457  | 19.36 | 3.26 | 56% |
| 51719  | CAB39     |   |   |   |  |   |   | NM_016289 | 26.61 | 3.28 | 56% |
| 10352  | WARS2     |   |   |   |  |   |   | BC044575  | 12.36 | 3.29 | 56% |
| 51300  | C3orf1    |   |   |   |  |   |   | BC012341  | 14.00 | 3.30 | 56% |
| 78990  | OTUB2     |   |   |   |  |   | Y | BC009615  | 20.31 | 3.30 | 56% |
| 127700 | C1orf102  |   |   |   |  |   |   | NM_145047 | 25.14 | 3.30 | 56% |
| 25966  | C21orf25  |   |   |   |  |   | Y | BC062323  | 28.89 | 3.31 | 56% |
| 6541   | SLC7A1    |   |   |   |  | Y |   | NM_003045 | 30.75 | 3.31 | 56% |
| 84366  | PRAC      |   |   |   |  |   |   | BC030950  | 15.86 | 3.32 | 56% |
| 10598  | AHSA1     |   |   |   |  |   |   | NM_012111 | 30.78 | 3.32 | 56% |
| 3628   | INPP1     |   |   |   |  |   |   | NM_002194 | 11.19 | 3.33 | 56% |
| 84196  | USP48     |   |   |   |  |   | Y | BC013567  | 81.86 | 3.34 | 56% |
| 714    | C1QC      |   |   |   |  |   | Y | BC009016  | 29.53 | 3.35 | 56% |
| 79712  | GTDC1     |   |   |   |  |   | Y | BC061699  | 12.86 | 3.37 | 56% |
| 114792 | KLHL32    |   |   |   |  |   |   | BC031830  | 7.64  | 3.38 | 56% |
| 79576  | NKAP      |   |   |   |  |   |   | BC015354  | 18.58 | 3.41 | 56% |
| 313    | AOAH      |   |   |   |  |   |   | NM_001637 | 10.06 | 3.42 | 56% |
| 113510 | HEL308    |   |   |   |  |   |   | BC011863  | 48.17 | 3.46 | 56% |
| 6891   | TAP2      | Y |   |   |  |   |   | BC002751  | 9.58  | 3.47 | 56% |
| 27074  | LAMP3     |   |   |   |  |   | Y | BC032940  | 9.72  | 3.47 | 56% |
| 8601   | RGS20     |   |   |   |  |   |   | NM_003702 | 13.36 | 3.49 | 56% |
| 3158   | HMGCS2    |   |   |   |  |   |   | NM_005518 | 22.06 | 3.50 | 56% |
| 6916   | TBXAS1    | Y |   |   |  |   |   | BC041157  | 11.22 | 3.51 | 56% |
| 8402   | SLC25A11  |   |   |   |  |   |   | NM_003562 | 14.28 | 3.53 | 56% |
| 4931   | NVL       |   |   |   |  |   |   | BC012105  | 20.53 | 3.53 | 56% |
| 51306  | C5orf5    |   |   |   |  |   |   | BC056887  | 10.14 | 3.54 | 56% |
| 64755  | C16orf58  |   |   |   |  |   |   | BC009308  | 6.89  | 3.54 | 56% |
| 9027   | NAT8      |   | Y | Y |  |   |   | BC012626  | 28.58 | 3.54 | 56% |
| 896    | CCND3     |   |   |   |  |   |   | NM_001760 | 12.25 | 3.55 | 56% |
| 497661 | LOC497661 |   |   |   |  |   |   | BC022357  | 12.64 | 3.56 | 56% |
| 65018  | PINK1     |   |   |   |  |   |   | NM_032409 | 12.58 | 3.57 | 56% |
| 2662   | GDF10     |   |   |   |  |   |   | BC028237  | 11.78 | 3.58 | 56% |
| 5199   | CFP       | Y |   |   |  |   | Y | NM_002621 | 28.19 | 3.58 | 56% |
| 153769 | SH3RF2    |   |   |   |  |   | Y | BC031650  | 20.94 | 3.59 | 56% |
| 51076  | CUTC      |   |   |   |  |   |   | BC021105  | 19.53 | 3.59 | 56% |
| 29842  | TFCP2L1   |   |   |   |  |   |   | NM_014553 | 30.78 | 3.62 | 56% |
| 25870  | SUMF2     |   |   |   |  |   |   | BC015600  | 17.47 | 3.63 | 56% |
| 9138   | ARHGEF1   |   |   |   |  |   |   | BC005155  | 15.75 | 3.63 | 56% |
| 440275 | EIF2AK4   |   |   |   |  |   |   | BC009350  | 18.97 | 3.64 | 56% |



|        |           |   |   |   |  |   |   |           |        |      |     |
|--------|-----------|---|---|---|--|---|---|-----------|--------|------|-----|
| 56943  | ENY2      |   |   |   |  |   |   | NM_020189 | 18.97  | 3.64 | 56% |
| 55346  | TCP11L1   |   |   |   |  |   |   | NM_018393 | 23.72  | 3.64 | 56% |
| 5991   | RFX3      |   |   |   |  |   |   | NM_134428 | 11.89  | 3.65 | 56% |
| 64771  | C6orf106  |   |   |   |  |   |   | NM_022758 | 12.00  | 3.65 | 56% |
| 4486   | MST1R     |   |   |   |  | Y |   | NM_002447 | 11.42  | 3.65 | 56% |
| 65125  | WNK1      |   | Y | Y |  |   |   | BC021121  | 21.94  | 3.66 | 56% |
| 4598   | MVK       |   |   |   |  |   |   | NM_000431 | 19.81  | 3.66 | 56% |
| 134492 | NUDCD2    |   |   |   |  |   |   | NM_145266 | 13.22  | 3.67 | 56% |
| 54206  | ERRF1     |   |   |   |  |   |   | NM_018948 | 10.97  | 3.67 | 56% |
| 9933   | KIAA0020  |   |   |   |  |   |   | NM_014878 | 19.06  | 3.67 | 56% |
| 9917   | FAM20B    |   |   |   |  |   |   | NM_014864 | 15.42  | 3.68 | 56% |
| 55069  | C7orf42   |   |   |   |  |   |   | BC010519  | 14.00  | 3.68 | 56% |
| 116138 | KLHDC3    |   |   |   |  |   |   | BC041793  | 8.89   | 3.69 | 56% |
| 25999  | CLIP3     | Y |   |   |  |   | Y | BC014486  | 17.19  | 3.69 | 56% |
| 27338  | UBE2S     |   |   |   |  |   |   | BC004236  | 11.75  | 3.70 | 56% |
| 9170   | EDG4      |   |   |   |  |   |   | NM_004720 | 12.14  | 3.70 | 56% |
| 10602  | CDC42EP3  | Y |   |   |  |   |   | NM_006449 | 43.78  | 3.71 | 56% |
| 84248  | FYTTD1    |   |   |   |  |   |   | BC035006  | 12.97  | 3.71 | 56% |
| 5573   | PRKAR1A   |   |   |   |  |   |   | NM_002734 | 32.83  | 3.75 | 56% |
| 7572   | ZNF24     |   |   |   |  |   |   | BC003566  | 56.25  | 3.75 | 56% |
| 972    | CD74      |   |   |   |  |   |   | BC024272  | 10.92  | 3.76 | 56% |
| 55876  | GSDML     |   |   |   |  | Y | Y | BC025682  | 45.92  | 3.83 | 56% |
| 6341   | SCO1      |   |   |   |  |   |   | NM_004589 | 21.17  | 3.84 | 56% |
| 5567   | PRKACB    |   |   |   |  |   |   | BC035058  | 11.39  | 3.86 | 56% |
| 64432  | MRPS25    |   |   | Y |  |   |   | NM_022497 | 20.03  | 3.86 | 56% |
| 79092  | CARD14    |   |   |   |  |   |   | BC018142  | 12.00  | 3.86 | 56% |
| 10450  | PPIE      |   |   |   |  |   |   | NM_006112 | 8.11   | 3.87 | 56% |
| 658    | BMPR1B    |   |   |   |  | Y |   | NM_001203 | 14.64  | 3.87 | 56% |
| 79144  | C20orf149 |   |   |   |  |   | Y | NM_024299 | 5.19   | 3.90 | 56% |
| 93661  | CAPZA3    |   |   |   |  |   |   | BC016745  | 11.64  | 3.91 | 56% |
| 374354 | NHLRC2    |   |   |   |  |   |   | BC032598  | 7.94   | 3.91 | 56% |
| 3386   | ICAM4     |   |   |   |  |   |   | NM_001544 | 19.06  | 3.93 | 56% |
| 6732   | SRPK1     |   |   |   |  |   |   | NM_003137 | 12.67  | 3.95 | 56% |
| 5129   | PCTK3     |   |   |   |  |   |   | BC011526  | 13.61  | 3.98 | 56% |
| 79618  | HMBOX1    | Y |   |   |  |   |   | BC009259  | 104.22 | 4.00 | 56% |
| 55256  | ADI1      |   |   | Y |  |   |   | BC001467  | 13.44  | 4.01 | 56% |
| 3551   | IKBKB     |   |   |   |  |   |   | BC006231  | 7.22   | 4.02 | 56% |
| 9798   | KIAA0174  |   |   |   |  |   |   | BC004359  | 14.86  | 4.04 | 56% |
| 6282   | S100A11   |   |   |   |  | Y | Y | NM_005620 | 33.03  | 4.04 | 56% |
| 48     | ACO1      |   | Y | Y |  |   |   | NM_002197 | 28.58  | 4.06 | 56% |
| 59343  | SENP2     |   |   |   |  |   |   | NM_021627 | 42.28  | 4.06 | 56% |
| 7371   | UCK2      |   |   |   |  | Y | Y | BC002906  | 36.53  | 4.08 | 56% |
| 5995   | RGR       |   |   |   |  |   | Y | BC008094  | 17.25  | 4.10 | 56% |
| 79969  | C6orf134  |   |   |   |  |   |   | BC006105  | 47.58  | 4.11 | 56% |
| 5096   | PCCB      |   |   |   |  |   |   | BC013768  | 9.03   | 4.11 | 56% |
| 382    | ARF6      |   |   |   |  |   |   | NM_001663 | 41.89  | 4.11 | 56% |
| 65997  | RASL11B   |   |   |   |  |   |   | NM_023940 | 69.19  | 4.12 | 56% |
| 4205   | MEF2A     |   |   |   |  |   |   | BC013437  | 129.33 | 4.14 | 56% |
| 29883  | CNOT7     |   |   |   |  |   |   | BC007315  | 13.78  | 4.18 | 56% |
| 10367  | CBARA1    |   |   | Y |  |   |   | BC004190  | 13.75  | 4.20 | 56% |
| 56683  | C21orf59  |   |   |   |  |   |   | NM_021254 | 61.11  | 4.20 | 56% |
| 83692  | CD99L2    |   |   |   |  |   |   | BC025729  | 13.03  | 4.21 | 56% |

|        |          |   |   |   |  |   |   |           |       |      |     |
|--------|----------|---|---|---|--|---|---|-----------|-------|------|-----|
| 133    | ADM      |   |   | Y |  |   |   | NM_001124 | 19.50 | 4.23 | 56% |
| 94101  | ORMDL1   |   |   |   |  |   |   | NM_016467 | 13.81 | 4.26 | 56% |
| 4134   | MAP4     |   |   |   |  |   |   | BC051843  | 23.97 | 4.32 | 56% |
| 9445   | ITM2B    |   |   |   |  |   |   | NM_021999 | 6.78  | 4.34 | 56% |
| 57161  | PELI2    |   |   |   |  |   |   | NM_021255 | 16.14 | 4.34 | 56% |
| 10     | NAT2     |   |   |   |  |   |   | BC015878  | 7.03  | 4.34 | 56% |
| 64798  | DEPDC6   |   |   |   |  |   |   | BC024746  | 6.92  | 4.35 | 56% |
| 57171  | DOLPP1   |   |   |   |  |   |   | BC040152  | 15.42 | 4.36 | 56% |
| 3251   | HPRT1    |   |   |   |  |   |   | BC000578  | 17.56 | 4.37 | 56% |
| 141    | ADPRH    |   |   |   |  |   |   | NM_001125 | 22.08 | 4.38 | 56% |
| 83758  | RBP5     |   | Y | Y |  |   |   | NM_031491 | 16.92 | 4.41 | 56% |
| 4595   | MUTYH    |   |   |   |  |   |   | BC003178  | 18.22 | 4.42 | 56% |
| 84236  | RHBDD1   |   |   |   |  |   |   | BC027900  | 11.58 | 4.45 | 56% |
| 7570   | ZNF22    |   |   |   |  |   |   | BC010642  | 10.61 | 4.58 | 56% |
| 8775   | NAPA     |   |   |   |  |   |   | NM_003827 | 7.64  | 4.58 | 56% |
| 83698  | CALN1    |   |   |   |  |   |   | NM_031468 | 9.58  | 4.58 | 56% |
| 55179  | FAIM     |   |   |   |  |   |   | NM_018147 | 15.08 | 4.60 | 56% |
| 2893   | GRIA4    |   |   |   |  |   |   | BC045546  | 11.97 | 4.65 | 56% |
| 147339 | C1orf25  |   |   |   |  |   |   | NM_145055 | 21.39 | 4.65 | 56% |
| 7288   | TULP2    |   |   |   |  |   |   | BC026070  | 24.00 | 4.68 | 56% |
| 7633   | ZNF79    |   |   |   |  |   |   | NM_007135 | 16.33 | 4.71 | 56% |
| 1106   | CHD2     |   |   |   |  |   |   | BC007347  | 9.97  | 4.71 | 56% |
| 10712  | C1orf2   |   |   |   |  |   |   | BC017262  | 14.22 | 4.72 | 56% |
| 7325   | UBE2E2   |   |   |   |  |   |   | NM_152653 | 12.06 | 4.73 | 56% |
| 149428 | BNIP1    |   |   |   |  |   |   | NM_138278 | 10.36 | 4.73 | 56% |
| 51399  | TRAPPC4  |   |   |   |  |   |   | NM_016146 | 24.14 | 4.75 | 56% |
| 10226  | M6PRBP1  |   |   |   |  |   |   | BC007566  | 18.08 | 4.76 | 56% |
| 117245 | HRASLS5  |   |   | Y |  |   |   | BC034222  | 8.42  | 4.76 | 56% |
| 55843  | ARHGAP15 |   |   |   |  |   | Y | BC038976  | 92.00 | 4.78 | 56% |
| 29844  | TFPT     |   |   |   |  |   |   | NM_013342 | 24.92 | 4.80 | 56% |
| 11143  | MYST2    |   |   |   |  |   |   | NM_007067 | 7.94  | 4.81 | 56% |
| 1027   | CDKN1B   |   |   |   |  |   |   | NM_004064 | 14.22 | 4.84 | 56% |
| 60370  | AVPI1    |   |   |   |  | Y |   | BC000877  | 19.86 | 4.85 | 56% |
| 84062  | DTNBP1   |   |   |   |  |   | Y | NM_032122 | 11.00 | 4.86 | 56% |
| 89853  | FAM125B  |   |   |   |  |   | Y | BC028675  | 7.83  | 4.87 | 56% |
| 93517  | HSPC105  |   |   |   |  |   |   | NM_145168 | 10.33 | 4.88 | 56% |
| 2118   | ETV4     |   |   | Y |  |   |   | BC007242  | 17.89 | 4.88 | 56% |
| 8031   | NCOA4    |   |   |   |  |   |   | BC012736  | 8.03  | 4.90 | 56% |
| 203068 | TUBB     |   |   |   |  |   |   | NM_178014 | 6.64  | 4.94 | 56% |
| 405    | ARNT     |   |   |   |  |   |   | BC060838  | 11.53 | 4.98 | 56% |
| 81539  | SLC38A1  |   |   |   |  |   | Y | BC010620  | 12.64 | 5.04 | 56% |
| 6251   | RSU1     |   |   |   |  |   |   | NM_012425 | 26.08 | 5.05 | 56% |
| 79074  | C2orf49  |   |   |   |  |   |   | NM_024093 | 8.50  | 5.08 | 56% |
| 11098  | PRSS23   |   |   |   |  |   |   | NM_007173 | 8.03  | 5.10 | 56% |
| 283431 | GAS2L3   |   |   | Y |  |   |   | NM_174942 | 10.58 | 5.14 | 56% |
| 9406   | ZRANB2   |   |   |   |  |   |   | BC039814  | 57.39 | 5.15 | 56% |
| 11309  | SLCO2B1  |   | Y | Y |  |   | Y | NM_007256 | 21.56 | 5.17 | 56% |
| 10385  | BTN2A2   |   |   |   |  |   |   | NM_006995 | 12.42 | 5.20 | 56% |
| 10068  | IL18BP   | Y |   |   |  |   |   | BC044215  | 9.94  | 5.22 | 56% |
| 8986   | RPS6KA4  |   |   |   |  |   |   | NM_003942 | 18.14 | 5.28 | 56% |
| 56959  | C9orf102 |   |   |   |  |   |   | BC022957  | 10.44 | 5.28 | 56% |
| 23291  | FBXW11   |   |   |   |  |   |   | BC026213  | 11.33 | 5.30 | 56% |

|        |            |   |   |   |  |  |   |           |       |      |     |
|--------|------------|---|---|---|--|--|---|-----------|-------|------|-----|
| 25816  | TNFAIP8    |   |   |   |  |  | Y | BC007014  | 7.28  | 5.31 | 56% |
| 23023  | TMCC1      |   |   |   |  |  | Y | BC039859  | 11.28 | 5.40 | 56% |
| 5473   | PPBP       |   |   |   |  |  |   | NM_002704 | 6.08  | 5.49 | 56% |
| 1070   | CETN3      |   |   |   |  |  |   | BC005383  | 21.00 | 5.51 | 56% |
| 55937  | APOM       |   | Y | Y |  |  |   | NM_019101 | 9.39  | 5.52 | 56% |
| 90843  | TCEAL8     |   |   |   |  |  |   | BC035573  | 7.25  | 5.54 | 56% |
| 9444   | QKI        | Y |   |   |  |  |   | NM_006775 | 46.14 | 5.55 | 56% |
| 55168  | MRPS18A    |   |   |   |  |  |   | NM_018135 | 5.69  | 5.56 | 56% |
| 91807  | MLCK       |   |   |   |  |  |   | NM_182493 | 24.11 | 5.58 | 56% |
| 26985  | AP3M1      |   |   |   |  |  |   | NM_012095 | 11.56 | 5.63 | 56% |
| 1643   | DDB2       |   |   |   |  |  |   | NM_000107 | 7.31  | 5.64 | 56% |
| 284119 | PTRF       |   |   |   |  |  | Y | NM_012232 | 17.03 | 5.77 | 56% |
| 9047   | SH2D2A     |   |   |   |  |  | Y | NM_003975 | 16.97 | 5.78 | 56% |
| 894    | CCND2      |   |   |   |  |  | Y | NM_001759 | 16.14 | 5.87 | 56% |
| 5261   | PHKG2      |   |   |   |  |  |   | BC002541  | 5.97  | 5.91 | 56% |
| 2551   | GABPA      |   |   |   |  |  |   | BC035031  | 6.31  | 6.04 | 56% |
| 79159  | NOL12      |   |   |   |  |  |   | NM_024313 | 10.31 | 6.04 | 56% |
| 57404  | CYP20A1    |   |   |   |  |  |   | BC033752  | 12.17 | 6.12 | 56% |
| 10459  | MAD2L2     |   |   |   |  |  |   | BC015244  | 8.86  | 6.19 | 56% |
| 24141  | C20orf103  |   |   |   |  |  | Y | NM_012261 | 10.28 | 6.24 | 56% |
| 51250  | C6orf203   |   |   |   |  |  |   | NM_016487 | 5.75  | 6.25 | 56% |
| 116254 | C6orf72    |   |   |   |  |  |   | NM_138785 | 12.31 | 6.31 | 56% |
| 2786   | GNG4       |   |   |   |  |  |   | NM_004485 | 4.47  | 6.33 | 56% |
| 254268 | C1orf62    |   |   |   |  |  |   | NM_152763 | 10.58 | 6.34 | 56% |
| 26578  | OSTF1      |   |   |   |  |  |   | NM_012383 | 13.06 | 6.34 | 56% |
| 92399  | MRRF       |   |   |   |  |  |   | NM_138777 | 6.33  | 6.36 | 56% |
| 57447  | NDRG2      |   |   |   |  |  |   | BC010458  | 7.47  | 6.38 | 56% |
| 5894   | RAF1       |   |   |   |  |  |   | NM_002880 | 13.53 | 6.40 | 56% |
| 51421  | AMOTL2     |   |   |   |  |  |   | BC011454  | 14.28 | 6.43 | 56% |
| 253260 | RICTOR     |   |   |   |  |  |   | BC029608  | 16.08 | 6.43 | 56% |
| 283232 | TMEM80     |   |   |   |  |  |   | NM_174940 | 4.67  | 6.46 | 56% |
| 64098  | PARVG      |   |   |   |  |  | Y | NM_022141 | 20.08 | 6.47 | 56% |
| 7803   | PTP4A1     |   |   |   |  |  |   | NM_003463 | 20.08 | 6.48 | 56% |
| 4257   | MGST1      |   | Y | Y |  |  | Y | NM_145792 | 9.06  | 6.49 | 56% |
| 10165  | SLC25A13   |   |   |   |  |  |   | NM_014251 | 15.89 | 6.60 | 56% |
| 51676  | ASB2       |   |   |   |  |  |   | NM_016150 | 11.22 | 6.61 | 56% |
| 81704  | DOCK8      |   |   |   |  |  |   | BC019102  | 8.58  | 6.63 | 56% |
| 92906  | HNRPLL     |   |   |   |  |  | Y | BC008217  | 9.53  | 6.79 | 56% |
| 27297  | RCP9       |   |   |   |  |  |   | BC040107  | 4.72  | 6.90 | 56% |
| 55320  | C14orf106  |   |   |   |  |  |   | BC051885  | 61.06 | 6.91 | 56% |
| 30815  | ST6GALNAC6 |   |   |   |  |  |   | NM_013443 | 8.83  | 7.10 | 56% |
| 28227  | PPP2R3B    |   |   |   |  |  |   | NM_199326 | 12.39 | 7.11 | 56% |
| 9659   | PDE4DIP    |   |   |   |  |  | Y | BC025406  | 6.47  | 7.26 | 56% |
| 689    | BTF3       |   |   |   |  |  | Y | NM_001207 | 6.06  | 7.43 | 56% |
| 4601   | MXI1       |   |   |   |  |  |   | NM_130439 | 21.08 | 7.46 | 56% |
| 25895  | FAM119B    |   | Y | Y |  |  |   | BC016395  | 10.00 | 7.48 | 56% |
| 3948   | LDHC       |   |   |   |  |  |   | NM_002301 | 34.64 | 7.54 | 56% |
| 3795   | KHK        |   | Y | Y |  |  |   | BC006233  | 14.56 | 7.58 | 56% |
| 1312   | COMT       |   |   |   |  |  |   | NM_000754 | 4.89  | 7.60 | 56% |
| 4286   | MITF       |   |   |   |  |  |   | BC026961  | 5.86  | 7.63 | 56% |
| 56681  | SAR1A      |   |   |   |  |  |   | NM_020150 | 7.86  | 7.67 | 56% |
| 29114  | TAGLN3     |   |   |   |  |  | Y | BC015329  | 18.50 | 7.81 | 56% |

|        |           |   |   |   |  |  |   |           |       |       |     |
|--------|-----------|---|---|---|--|--|---|-----------|-------|-------|-----|
| 6159   | RPL29     |   |   |   |  |  | Y | NM_000992 | 8.14  | 8.17  | 56% |
| 6003   | RGS13     |   |   |   |  |  | Y | NM_002927 | 6.61  | 8.34  | 56% |
| 130951 | LOC130951 |   |   |   |  |  |   | BC014602  | 3.14  | 8.41  | 56% |
| 51507  | C2orf43   |   |   |   |  |  |   | BC002769  | 7.92  | 8.42  | 56% |
| 55540  | IL17RB    |   | Y | Y |  |  |   | BC000980  | 7.33  | 8.48  | 56% |
| 10964  | IFI44L    | Y |   |   |  |  |   | BC015932  | 6.22  | 8.61  | 56% |
| 2593   | GAMT      |   |   |   |  |  |   | BC017936  | 9.08  | 8.89  | 56% |
| 26017  | FAM32A    |   |   |   |  |  |   | NM_014077 | 5.06  | 8.98  | 56% |
| 80763  | C12orf39  |   |   |   |  |  |   | NM_030572 | 7.72  | 9.08  | 56% |
| 55039  | TRMT12    |   |   |   |  |  |   | BC011713  | 6.81  | 9.17  | 56% |
| 254263 | CNIH2     |   |   |   |  |  |   | NM_182553 | 4.69  | 9.25  | 56% |
| 90139  | TSPAN18   |   |   | Y |  |  |   | BC019342  | 13.06 | 9.25  | 56% |
| 131831 | C3orf44   |   |   |   |  |  |   | NM_152394 | 10.03 | 9.28  | 56% |
| 79158  | GNPTAB    |   |   | Y |  |  |   | NM_024312 | 4.11  | 9.53  | 56% |
| 10541  | ANP32B    |   |   |   |  |  |   | NM_006401 | 6.39  | 9.70  | 56% |
| 10935  | PRDX3     |   |   |   |  |  |   | BC008435  | 13.25 | 9.71  | 56% |
| 154075 | SAMD3     |   |   |   |  |  |   | NM_152552 | 4.69  | 9.91  | 56% |
| 84902  | CCDC123   |   |   |   |  |  |   | BC012783  | 6.36  | 9.99  | 56% |
| 6790   | AURKA     |   |   |   |  |  |   | NM_003600 | 6.58  | 10.01 | 56% |
| 7374   | UNG       |   |   |   |  |  |   | NM_003362 | 3.72  | 10.02 | 56% |
| 6923   | TCEB2     |   |   |   |  |  |   | NM_007108 | 7.42  | 10.04 | 56% |
| 554203 | LOC554203 |   |   |   |  |  |   | BC029480  | 7.50  | 10.11 | 56% |
| 10301  | DLEU1     |   |   |   |  |  |   | BC020692  | 3.86  | 10.19 | 56% |
| 8858   | PROZ      |   | Y | Y |  |  |   | NM_003891 | 4.58  | 10.35 | 56% |
| 79666  | PLEKHF2   |   |   | Y |  |  |   | NM_024613 | 6.97  | 10.35 | 56% |
| 6999   | TDO2      |   |   |   |  |  |   | NM_005651 | 4.44  | 10.49 | 56% |
| 203286 | ANKS6     | Y |   |   |  |  |   | BC064367  | 3.97  | 10.67 | 56% |
| 148252 | DIRAS1    |   |   |   |  |  |   | NM_145173 | 3.11  | 11.10 | 56% |
| 3898   | LAD1      |   |   |   |  |  | Y | NM_005558 | 4.83  | 11.22 | 56% |
| 55783  | FLJ11171  |   |   |   |  |  |   | BC034468  | 5.06  | 11.26 | 56% |
| 79169  | C1orf35   |   |   |   |  |  |   | NM_024319 | 5.25  | 11.75 | 56% |
| 159963 | SLC5A12   |   | Y | Y |  |  |   | NM_178498 | 3.64  | 12.17 | 56% |
| 3146   | HMGB1     |   |   |   |  |  |   | NM_002128 | 7.72  | 12.18 | 56% |
| 5156   | PDGFRA    |   |   |   |  |  | Y | BC015186  | 3.19  | 12.57 | 56% |
| 10966  | RAB40B    |   |   | Y |  |  |   | NM_006822 | 2.47  | 12.70 | 56% |
| 51367  | POP5      |   |   |   |  |  |   | NM_015918 | 15.00 | 12.80 | 56% |
| 26147  | PHF19     |   |   |   |  |  |   | BC022374  | 4.58  | 13.12 | 56% |
| 6442   | SGCA      |   |   |   |  |  | Y | NM_000023 | 6.97  | 13.47 | 56% |
| 7072   | TIA1      |   |   |   |  |  |   | BC015944  | 9.00  | 13.48 | 56% |
| 83987  | CCDC8     |   |   |   |  |  |   | BC025243  | 11.89 | 13.72 | 56% |
| 29982  | NRBF2     |   |   |   |  |  |   | BC011707  | 9.56  | 14.00 | 56% |
| 6941   | TCF19     |   |   |   |  |  |   | BC002493  | 3.17  | 14.28 | 56% |
| 10742  | RAI2      |   |   |   |  |  |   | BC027937  | 5.75  | 14.44 | 56% |
| 11340  | EXOSC8    |   |   |   |  |  |   | NM_181503 | 6.67  | 14.99 | 56% |
| 10221  | TRIB1     |   |   |   |  |  |   | NM_025195 | 2.89  | 15.75 | 56% |
| 386759 | MGC9913   |   |   |   |  |  |   | BC008651  | 2.42  | 16.52 | 56% |
| 6284   | S100A13   |   |   |   |  |  | Y | NM_005979 | 22.19 | 18.32 | 56% |
| 10808  | HSPH1     |   |   |   |  |  | Y | NM_006644 | 5.22  | 19.26 | 56% |
| 5469   | PPARBP    |   |   |   |  |  |   | BC060758  | 3.33  | 19.27 | 56% |
| 55634  | ZNF673    |   |   |   |  |  |   | BC012569  | 4.06  | 19.95 | 56% |
| 79864  | C11orf63  |   |   |   |  |  |   | BC009820  | 4.00  | 20.76 | 56% |
| 5501   | PPP1CC    |   |   |   |  |  |   | NM_002710 | 3.56  | 21.13 | 56% |

|        |           |   |   |   |  |  |   |  |           |         |         |     |
|--------|-----------|---|---|---|--|--|---|--|-----------|---------|---------|-----|
| 10717  | AP4B1     |   |   |   |  |  | Y |  | BC014146  | 2.72    | 22.79   | 56% |
| 26586  | CKAP2     |   |   |   |  |  |   |  | BC010901  | 4.58    | 24.10   | 56% |
| 140461 | ASB8      |   |   |   |  |  |   |  | BC001321  | 3.36    | 25.47   | 56% |
| 23594  | ORC6L     |   |   |   |  |  |   |  | NM_014321 | 2.08    | 25.73   | 56% |
| 57182  | ANKRD50   |   |   |   |  |  | Y |  | BC024725  | 1.69    | 27.38   | 56% |
| 196483 | FAM86A    |   |   |   |  |  |   |  | BC010084  | 0.61    | 29.19   | 56% |
| 29110  | TBK1      |   |   |   |  |  |   |  | NM_013254 | 1.50    | 55.03   | 56% |
| 56898  | BDH2      |   | Y | Y |  |  |   |  | NM_020139 | 0.89    | 87.31   | 56% |
| 23168  | RTF1      |   |   |   |  |  |   |  | NM_015138 | 4.06    | 124.31  | 56% |
| 136895 | C7orf31   |   |   |   |  |  |   |  | BC043269  | 0.42    | 378.45  | 56% |
| 26100  | WIPI2     |   |   |   |  |  |   |  | NM_015610 | 0.06    | 976.44  | 56% |
| 56941  | C3orf37   |   |   |   |  |  |   |  | BC010125  | -0.14   | -171.89 | 50% |
| 124773 | C17orf64  |   |   |   |  |  |   |  | NM_181707 | -0.78   | -159.80 | 50% |
| 51710  | ZNF44     |   |   |   |  |  |   |  | BC032246  | -1.00   | -61.61  | 50% |
| 6181   | RPLP2     |   |   |   |  |  |   |  | NM_001004 | -1.14   | -54.65  | 50% |
| 10553  | HTATIP2   |   |   |   |  |  |   |  | BC015358  | -2.67   | -44.10  | 50% |
| 1611   | DAP       |   |   |   |  |  |   |  | NM_004394 | -3.42   | -41.99  | 50% |
| 5175   | PECAM1    | Y |   |   |  |  |   |  | NM_000442 | -0.89   | -40.41  | 50% |
| 25949  | SYF2      |   |   |   |  |  |   |  | NM_015484 | -1.61   | -40.04  | 50% |
| 3821   | KLRC1     |   |   |   |  |  | Y |  | BC053840  | -1.28   | -40.02  | 50% |
| 255104 | TMCO4     |   |   |   |  |  |   |  | BC053600  | -5.92   | -34.97  | 50% |
| 4869   | NPM1      |   |   |   |  |  |   |  | BC009623  | -1.11   | -31.68  | 50% |
| 133690 | CAPSL     |   |   |   |  |  |   |  | NM_144647 | -2.64   | -26.25  | 50% |
| 3936   | LCP1      |   |   |   |  |  | Y |  | NM_002298 | -2.39   | -24.68  | 50% |
| 7126   | TNFAIP1   |   |   |   |  |  |   |  | NM_021137 | -1.75   | -22.34  | 50% |
| 7903   | ST8SIA4   |   |   |   |  |  | Y |  | BC027866  | -1.50   | -21.89  | 50% |
| 10067  | SCAMP3    |   |   |   |  |  |   |  | NM_005698 | -2.89   | -19.23  | 50% |
| 23498  | HAAO      |   | Y | Y |  |  |   |  | BC029510  | -2.92   | -16.11  | 50% |
| 80895  | ILKAP     |   |   |   |  |  |   |  | NM_030768 | -2.81   | -14.75  | 50% |
| 9473   | C1orf38   |   |   |   |  |  | Y |  | BC031655  | -8.64   | -13.99  | 50% |
| 5886   | RAD23A    |   |   |   |  |  |   |  | NM_005053 | -4.67   | -13.76  | 50% |
| 83937  | RASSF4    |   | Y | Y |  |  |   |  | NM_032023 | -24.33  | -13.69  | 50% |
| 7991   | TUSC3     |   |   |   |  |  | Y |  | NM_178234 | -6.03   | -13.66  | 50% |
| 79696  | C14orf140 |   |   |   |  |  |   |  | BC004259  | -7.47   | -13.66  | 50% |
| 9360   | PPIG      |   |   |   |  |  |   |  | BC001555  | -3.28   | -13.39  | 50% |
| 54984  | PINX1     |   |   |   |  |  |   |  | BC015479  | -6.25   | -12.73  | 50% |
| 51377  | UCHL5     |   |   |   |  |  |   |  | BC025369  | -4.11   | -12.51  | 50% |
| 84992  | PIGY      |   |   |   |  |  |   |  | NM_032906 | -50.67  | -12.46  | 50% |
| 9124   | PDLIM1    |   |   |   |  |  |   |  | NM_020992 | -15.78  | -11.86  | 50% |
| 150094 | SNF1LK    |   |   |   |  |  | Y |  | BC038504  | -7.19   | -11.68  | 50% |
| 51002  | TPRKB     |   |   |   |  |  |   |  | NM_016058 | -12.75  | -10.59  | 50% |
| 79084  | WDR77     |   |   |   |  |  | Y |  | NM_024102 | -5.36   | -10.07  | 50% |
| 4678   | NASP      |   |   |   |  |  |   |  | NM_002482 | -6.36   | -10.04  | 50% |
| 10783  | NEK6      |   |   | Y |  |  |   |  | BC012761  | -13.83  | -9.67   | 50% |
| 1020   | CDK5      |   | Y | Y |  |  |   |  | NM_004935 | -75.31  | -9.50   | 50% |
| 366    | AQP9      | Y |   |   |  |  |   |  | NM_020980 | -14.42  | -8.58   | 50% |
| 221079 | ARL5B     |   |   |   |  |  |   |  | NM_178815 | -7.78   | -8.18   | 50% |
| 29063  | ZCCHC4    |   |   |   |  |  |   |  | BC016914  | -11.94  | -8.09   | 50% |
| 11107  | PRDM5     |   |   |   |  |  |   |  | BC066942  | -31.11  | -7.73   | 50% |
| 92     | ACVR2A    |   |   |   |  |  |   |  | NM_001616 | -161.50 | -7.63   | 50% |
| 204962 | SLC44A5   |   |   |   |  |  |   |  | NM_152697 | -65.11  | -6.93   | 50% |
| 8192   | CLPP      |   |   |   |  |  |   |  | NM_006012 | -51.50  | -6.78   | 50% |

|        |          |   |   |   |  |   |   |              |         |       |     |
|--------|----------|---|---|---|--|---|---|--------------|---------|-------|-----|
| 57403  | RAB22A   |   |   |   |  |   |   | NM_020673    | -54.28  | -6.68 | 50% |
| 126823 | KARCA1   |   |   |   |  |   |   | BC022077     | -19.06  | -6.47 | 50% |
| 201965 | RWDD4A   |   |   |   |  |   |   | NM_152682    | -59.72  | -6.38 | 50% |
| 116442 | RAB39B   |   |   |   |  |   |   | NM_171998    | -8.94   | -6.05 | 50% |
| 117155 | CATSPER2 |   |   |   |  |   |   | NM_054020    | -25.39  | -6.00 | 50% |
| 146542 | ZNF688   |   |   |   |  |   |   | NM_145271    | -14.92  | -5.86 | 50% |
| 90317  | ZNF616   |   |   |   |  | Y |   | NM_178523    | -13.31  | -5.85 | 50% |
| 10524  | HTATIP   |   |   |   |  |   |   | NM_006388    | -51.03  | -5.43 | 50% |
| 7319   | UBE2A    |   |   |   |  |   |   | BC010175     | -8.58   | -5.29 | 50% |
| 93     | ACVR2B   |   |   |   |  |   |   | NM_001106    | -156.64 | -5.10 | 50% |
| 83931  | STK40    |   |   | Y |  |   |   | NM_032017    | -20.69  | -4.83 | 50% |
| 286257 | C9orf142 |   |   |   |  |   |   | NM_183241    | -109.61 | -4.12 | 50% |
| 84068  | SLC10A7  |   |   |   |  |   |   | BC023288     | -85.31  | -4.07 | 50% |
| 118426 | LOH12CR1 |   |   |   |  |   |   | NM_058169    | -229.31 | -4.00 | 50% |
| 5936   | RBM4     |   |   |   |  |   |   | BC021120     | -13.31  | -3.89 | 50% |
| 1600   | DAB1     |   |   |   |  |   |   | BC067446     | -97.94  | -3.88 | 50% |
| 6013   | RLN1     |   |   |   |  |   |   | NM_006911    | 56.92   | 1.82  | 50% |
| 824    | CAPN2    |   |   |   |  |   |   | BC021303     | 38.78   | 1.88  | 50% |
| 11040  | PIM2     |   |   |   |  | Y |   | BC018111     | 37.89   | 1.88  | 50% |
| 6392   | SDHD     |   |   |   |  |   |   | NM_003002    | 68.94   | 1.93  | 50% |
| 7301   | TYRO3    | Y |   |   |  |   |   | NM_006293    | 76.92   | 1.98  | 50% |
| 4199   | ME1      |   |   |   |  | Y | Y | NM_002395    | 59.08   | 2.01  | 50% |
| 51626  | DYNC2LI1 |   |   |   |  |   |   | BC006969     | 40.56   | 2.03  | 50% |
| 55850  | MDS032   |   |   |   |  |   |   | BC006005     | 23.69   | 2.03  | 50% |
| 11200  | CHEK2    |   |   |   |  |   |   | BC004207     | 52.39   | 2.04  | 50% |
| 10000  | AKT3     |   |   |   |  |   |   | NM_005465    | 36.25   | 2.07  | 50% |
| 9406   | ZRANB2   |   |   |   |  |   |   | BC039814     | 89.64   | 2.08  | 50% |
| 2617   | GARS     |   |   |   |  |   |   | BC007722     | 40.19   | 2.10  | 50% |
| 3026   | HABP2    |   | Y | Y |  |   |   | BC031412     | 24.97   | 2.11  | 50% |
| 79733  | E2F8     |   |   |   |  |   |   | BC028244     | 126.19  | 2.12  | 50% |
| 5696   | PSMB8    |   |   |   |  |   |   | NM_004159    | 45.78   | 2.13  | 50% |
| 8676   | STX11    | Y |   |   |  |   |   | NM_003764    | 40.25   | 2.14  | 50% |
| 54926  | UBE2R2   |   |   |   |  |   |   | NM_017811    | 32.61   | 2.14  | 50% |
| 6888   | TALDO1   |   |   |   |  |   |   | NM_006755    | 49.47   | 2.14  | 50% |
| 79947  | DHDDS    |   |   | Y |  |   |   | BC004117     | 23.92   | 2.16  | 50% |
| 142679 | DUSP19   |   |   |   |  |   |   | NM_080876    | 50.56   | 2.16  | 50% |
| 151056 | PLB1     |   |   |   |  |   |   | BC042674     | 23.53   | 2.19  | 50% |
| 948    | CD36     |   |   |   |  |   | Y | BC008406     | 31.03   | 2.21  | 50% |
| 6342   | SCP2     |   |   |   |  |   |   | NM_001007098 | 16.28   | 2.22  | 50% |
| 85477  | SCIN     |   |   |   |  |   |   | BC021090     | 16.50   | 2.24  | 50% |
| 2769   | GNA15    |   |   |   |  |   | Y | NM_002068    | 22.33   | 2.24  | 50% |
| 112495 | C6orf51  |   |   |   |  |   |   | NM_138408    | 18.36   | 2.24  | 50% |
| 51026  | GOLT1B   |   |   |   |  |   |   | NM_016072    | 21.08   | 2.27  | 50% |
| 5176   | SERPINF1 |   |   |   |  |   | Y | BC000522     | 17.03   | 2.27  | 50% |
| 60526  | C2orf43  |   |   |   |  |   |   | NM_021925    | 86.92   | 2.31  | 50% |
| 113675 | SDSL     |   |   | Y |  |   |   | NM_138432    | 29.39   | 2.31  | 50% |
| 51699  | VPS29    |   |   |   |  |   |   | BC032462     | 18.19   | 2.31  | 50% |
| 27044  | SND1     |   |   |   |  |   |   | BC017180     | 49.06   | 2.32  | 50% |
| 5125   | PCSK5    |   |   |   |  |   | Y | NM_006200    | 22.19   | 2.32  | 50% |
| 29889  | GNL2     |   |   |   |  |   |   | BC009250     | 55.94   | 2.32  | 50% |
| 80122  | YSK4     |   |   |   |  |   |   | BC034417     | 25.81   | 2.32  | 50% |
| 23640  | HSPBP1   |   |   |   |  |   |   | BC002373     | 22.97   | 2.32  | 50% |

|        |           |   |   |   |  |   |   |           |       |      |     |
|--------|-----------|---|---|---|--|---|---|-----------|-------|------|-----|
| 4117   | MAK       |   |   |   |  |   |   | NM_005906 | 21.39 | 2.33 | 50% |
| 84321  | THOC3     |   |   |   |  |   |   | NM_032361 | 29.75 | 2.34 | 50% |
| 637    | BID       |   |   |   |  |   | Y | BC036364  | 24.39 | 2.35 | 50% |
| 535    | ATP6V0A1  |   |   |   |  |   |   | BC032398  | 36.25 | 2.36 | 50% |
| 213    | ALB       |   |   | Y |  |   |   | NM_000477 | 92.08 | 2.38 | 50% |
| 2241   | FER       |   |   |   |  |   |   | NM_005246 | 18.75 | 2.38 | 50% |
| 63893  | UBE2O     |   |   |   |  |   |   | BC022237  | 55.47 | 2.38 | 50% |
| 1394   | CRHR1     |   |   |   |  |   |   | NM_004382 | 35.14 | 2.39 | 50% |
| 8999   | CDKL2     |   |   |   |  |   |   | NM_003948 | 25.75 | 2.39 | 50% |
| 5478   | PPIA      |   |   |   |  |   |   | BC005982  | 17.31 | 2.39 | 50% |
| 51099  | ABHD5     |   |   |   |  |   |   | NM_016006 | 48.39 | 2.40 | 50% |
| 2101   | ESRRA     |   |   |   |  |   |   | NM_004451 | 18.11 | 2.40 | 50% |
| 83734  | ATG10     |   |   |   |  |   |   | NM_031482 | 18.53 | 2.42 | 50% |
| 1908   | EDN3      |   |   |   |  |   |   | BC053866  | 41.22 | 2.43 | 50% |
| 255394 | TCP11L2   |   |   |   |  |   |   | NM_152772 | 72.89 | 2.44 | 50% |
| 3422   | IDI1      |   |   |   |  |   |   | NM_004508 | 14.75 | 2.44 | 50% |
| 54681  | PH-4      |   |   |   |  |   |   | NM_177938 | 30.94 | 2.46 | 50% |
| 53347  | UBASH3A   |   |   |   |  |   | Y | BC028138  | 19.78 | 2.46 | 50% |
| 845    | CASQ2     |   |   |   |  |   |   | BC022288  | 11.58 | 2.47 | 50% |
| 1339   | COX6A2    |   |   |   |  |   |   | NM_005205 | 34.50 | 2.48 | 50% |
| 387    | RHOA      |   |   |   |  |   |   | NM_001664 | 34.83 | 2.48 | 50% |
| 80017  | C14orf159 |   |   |   |  |   |   | BC009182  | 29.42 | 2.48 | 50% |
| 3957   | LGALS2    |   | Y | Y |  |   |   | NM_006498 | 10.86 | 2.48 | 50% |
| 9817   | KEAP1     |   |   |   |  |   |   | NM_012289 | 30.17 | 2.48 | 50% |
| 54820  | NDE1      |   |   |   |  |   | Y | NM_017668 | 22.03 | 2.49 | 50% |
| 998    | CDC42     |   |   |   |  |   |   | NM_001791 | 26.56 | 2.49 | 50% |
| 151516 | SASP      |   |   |   |  |   |   | BC031997  | 36.39 | 2.49 | 50% |
| 6274   | S100A3    |   |   |   |  |   |   | NM_002960 | 21.72 | 2.49 | 50% |
| 5184   | PEPD      |   | Y | Y |  |   |   | BC004305  | 20.08 | 2.50 | 50% |
| 51582  | AZIN1     |   |   |   |  |   | Y | NM_015878 | 20.17 | 2.52 | 50% |
| 8623   | ASMTL     |   |   |   |  |   |   | BC010089  | 22.61 | 2.52 | 50% |
| 122060 | SLAIN1    |   |   |   |  |   |   | NM_144595 | 28.58 | 2.53 | 50% |
| 285381 | DPH3      |   |   | Y |  |   |   | BC010181  | 21.47 | 2.53 | 50% |
| 5977   | DPF2      |   |   |   |  |   |   | BC014889  | 48.97 | 2.53 | 50% |
| 91010  | FMNL3     |   |   |   |  |   |   | BC033181  | 17.22 | 2.54 | 50% |
| 29034  | PRO0132   |   |   |   |  |   |   | BC020670  | 34.78 | 2.54 | 50% |
| 25932  | CLIC4     |   | Y | Y |  |   |   | NM_013943 | 28.92 | 2.54 | 50% |
| 5468   | PPARG     |   |   |   |  |   | Y | NM_015869 | 22.06 | 2.55 | 50% |
| 7535   | ZAP70     |   |   |   |  |   | Y | BC039039  | 62.44 | 2.56 | 50% |
| 85479  | DNAJC5B   |   |   |   |  |   |   | NM_033105 | 16.17 | 2.57 | 50% |
| 54541  | DDIT4     |   |   |   |  | Y | Y | NM_019058 | 16.14 | 2.58 | 50% |
| 55849  | ALG13     |   |   |   |  |   |   | NM_018466 | 55.61 | 2.58 | 50% |
| 80153  | EDC3      |   |   |   |  |   |   | NM_025083 | 91.17 | 2.61 | 50% |
| 8836   | GGH       |   | Y | Y |  |   |   | NM_003878 | 13.69 | 2.62 | 50% |
| 8082   | SSPN      |   |   |   |  |   | Y | NM_005086 | 19.67 | 2.63 | 50% |
| 123879 | DCUN1D3   |   |   |   |  |   |   | NM_173475 | 12.94 | 2.64 | 50% |
| 1787   | TRDMT1    |   | Y | Y |  |   |   | BC047733  | 17.89 | 2.65 | 50% |
| 11260  | XPOT      |   |   |   |  |   |   | BC020569  | 17.78 | 2.65 | 50% |
| 6446   | SGK       | Y |   |   |  |   |   | NM_005627 | 24.69 | 2.66 | 50% |
| 5050   | PAFAH1B3  |   |   |   |  |   |   | BC007863  | 15.31 | 2.66 | 50% |
| 55163  | PNPO      |   | Y | Y |  |   |   | NM_018129 | 28.36 | 2.67 | 50% |
| 10345  | TRDN      |   |   |   |  |   | Y | BC070290  | 35.94 | 2.67 | 50% |

|        |           |   |   |   |  |  |   |   |           |        |      |     |
|--------|-----------|---|---|---|--|--|---|---|-----------|--------|------|-----|
| 4217   | MAP3K5    |   |   |   |  |  |   | Y | NM_005923 | 17.08  | 2.67 | 50% |
| 81502  | HM13      |   |   |   |  |  |   |   | BC008959  | 30.36  | 2.67 | 50% |
| 695    | BTK       |   |   |   |  |  |   | Y | NM_000061 | 29.92  | 2.67 | 50% |
| 1030   | CDKN2B    |   |   |   |  |  | Y | Y | NM_004936 | 26.50  | 2.68 | 50% |
| 196394 | AMN1      |   |   |   |  |  |   |   | NM_207337 | 47.97  | 2.71 | 50% |
| 54531  | MIER2     |   |   |   |  |  |   |   | BC028203  | 38.17  | 2.71 | 50% |
| 1365   | CLDN3     |   |   |   |  |  |   |   | NM_001306 | 12.94  | 2.71 | 50% |
| 54927  | CHCHD3    | Y |   |   |  |  |   |   | NM_017812 | 27.11  | 2.72 | 50% |
| 373    | TRIM23    |   |   |   |  |  |   |   | NM_001656 | 25.44  | 2.73 | 50% |
| 3688   | ITGB1     |   |   |   |  |  |   |   | NM_002211 | 37.44  | 2.73 | 50% |
| 133584 | EGFLAM    |   |   |   |  |  |   |   | NM_182801 | 20.06  | 2.73 | 50% |
| 7746   | ZNF193    |   |   |   |  |  |   |   | NM_006299 | 97.11  | 2.74 | 50% |
| 64216  | TFB2M     |   |   |   |  |  |   |   | BC003383  | 22.92  | 2.74 | 50% |
| 51098  | IFT52     |   |   |   |  |  |   |   | BC039831  | 27.69  | 2.75 | 50% |
| 54165  | DCUN1D1   |   |   |   |  |  |   |   | BC009478  | 20.47  | 2.75 | 50% |
| 5126   | PCSK2     |   |   |   |  |  |   |   | BC040546  | 27.83  | 2.77 | 50% |
| 2674   | GFRA1     |   |   | Y |  |  |   |   | NM_145793 | 20.89  | 2.78 | 50% |
| 58477  | SRPRB     |   |   |   |  |  |   |   | NM_021203 | 19.50  | 2.79 | 50% |
| 3622   | ING2      |   |   |   |  |  |   |   | NM_001564 | 15.69  | 2.79 | 50% |
| 10102  | TSMF      |   |   |   |  |  |   |   | NM_005726 | 13.75  | 2.80 | 50% |
| 2286   | FKBP2     |   |   |   |  |  |   |   | NM_004470 | 14.50  | 2.81 | 50% |
| 171546 | C14orf147 |   |   |   |  |  |   | Y | NM_138288 | 16.47  | 2.81 | 50% |
| 51728  | POLR3K    |   |   |   |  |  |   |   | NM_016310 | 34.94  | 2.81 | 50% |
| 48     | ACO1      |   | Y | Y |  |  |   |   | NM_002197 | 20.17  | 2.82 | 50% |
| 206338 | FLJ90650  |   |   |   |  |  |   | Y | BC045809  | 16.22  | 2.84 | 50% |
| 83636  | C19orf12  |   |   | Y |  |  |   |   | NM_031448 | 16.72  | 2.85 | 50% |
| 1004   | CDH6      |   | Y | Y |  |  |   |   | BC000019  | 39.36  | 2.86 | 50% |
| 9948   | WDR1      |   |   |   |  |  |   |   | NM_017491 | 18.75  | 2.88 | 50% |
| 2870   | GRK6      |   |   |   |  |  |   |   | NM_002082 | 125.33 | 2.89 | 50% |
| 653423 | SPAG11A   |   |   |   |  |  |   |   | BC058833  | 11.83  | 2.89 | 50% |
| 9235   | IL32      |   | Y | Y |  |  |   |   | BC018782  | 27.19  | 2.91 | 50% |
| 8424   | BBOX1     |   | Y | Y |  |  |   |   | NM_003986 | 26.19  | 2.91 | 50% |
| 10899  | JTB       |   |   |   |  |  |   |   | NM_006694 | 14.97  | 2.92 | 50% |
| 50852  | TRAT1     |   |   |   |  |  |   | Y | NM_016388 | 19.64  | 2.93 | 50% |
| 9200   | PTPLA     |   |   |   |  |  |   | Y | NM_014241 | 16.61  | 2.95 | 50% |
| 54433  | NOLA1     |   |   |   |  |  |   |   | NM_018983 | 19.17  | 2.96 | 50% |
| 151647 | FAM19A4   |   |   |   |  |  |   |   | NM_182522 | 8.72   | 2.96 | 50% |
| 253827 | MSRB3     | Y |   |   |  |  |   | Y | BC040053  | 16.64  | 2.97 | 50% |
| 5029   | P2RY2     |   |   |   |  |  |   |   | BC028135  | 15.64  | 2.97 | 50% |
| 140462 | ASB9      |   | Y | Y |  |  |   |   | BC001244  | 27.39  | 2.98 | 50% |
| 79020  | C7orf25   |   |   |   |  |  |   |   | BC000769  | 17.89  | 2.98 | 50% |
| 2078   | ERG       | Y |   |   |  |  |   |   | NM_182918 | 14.39  | 2.99 | 50% |
| 4524   | MTHFR     |   |   | Y |  |  |   |   | BC018766  | 11.64  | 3.00 | 50% |
| 326624 | RAB37     |   |   |   |  |  |   |   | NM_175738 | 35.39  | 3.00 | 50% |
| 254295 | PHYHD1    |   |   |   |  |  |   |   | BC053853  | 10.72  | 3.01 | 50% |
| 340061 | TMEM173   |   |   |   |  |  |   |   | NM_198282 | 18.19  | 3.01 | 50% |
| 130916 | MTERFD2   | Y |   |   |  |  |   |   | BC053533  | 10.97  | 3.01 | 50% |
| 1632   | DCI       |   |   |   |  |  |   |   | BC009631  | 15.83  | 3.02 | 50% |
| 2815   | GP9       |   |   |   |  |  |   |   | BC030229  | 20.94  | 3.02 | 50% |
| 4638   | MYLK      | Y |   |   |  |  |   | Y | NM_005965 | 13.97  | 3.02 | 50% |
| 26354  | GNL3      |   |   |   |  |  |   | Y | NM_014366 | 10.31  | 3.03 | 50% |
| 338094 | C1orf179  | Y | Y | Y |  |  |   |   | BC015993  | 13.28  | 3.03 | 50% |



|        |          |   |   |   |  |  |     |           |        |      |     |
|--------|----------|---|---|---|--|--|-----|-----------|--------|------|-----|
| 10096  | ACTR3    |   |   |   |  |  |     | BC044590  | 12.47  | 3.04 | 50% |
| 27250  | PDCD4    |   |   |   |  |  |     | BC026104  | 23.00  | 3.04 | 50% |
| 4707   | NDUFB1   |   |   |   |  |  |     | NM_004545 | 25.78  | 3.05 | 50% |
| 5055   | SERPINB2 |   |   |   |  |  | Y   | BC012609  | 14.89  | 3.05 | 50% |
| 57393  | TMEM27   |   | Y | Y |  |  |     | NM_020665 | 16.50  | 3.06 | 50% |
| 23534  | TNPO3    |   |   |   |  |  |     | BC068530  | 19.06  | 3.09 | 50% |
| 10807  | SDCCAG3  |   |   |   |  |  |     | NM_006643 | 14.86  | 3.09 | 50% |
| 1893   | ECM1     | Y |   |   |  |  |     | BC023505  | 32.28  | 3.12 | 50% |
| 339221 | ENPP7    |   |   |   |  |  |     | NM_178543 | 20.11  | 3.12 | 50% |
| 1026   | CDKN1A   |   |   |   |  |  |     | NM_078467 | 15.75  | 3.12 | 50% |
| 5406   | PNLIP    |   |   |   |  |  | Y   | NM_000936 | 11.17  | 3.13 | 50% |
| 65220  | NADK     |   |   |   |  |  |     | BC001709  | 35.97  | 3.15 | 50% |
| 3283   | HSD3B1   |   | Y | Y |  |  |     | BC031999  | 24.19  | 3.15 | 50% |
| 28987  | NOB1     |   |   |   |  |  | Y   | NM_014062 | 126.61 | 3.15 | 50% |
| 10923  | SUB1     |   |   |   |  |  |     | BC010537  | 13.25  | 3.16 | 50% |
| 51693  | TRAPPC2L |   |   |   |  |  |     | BC017440  | 22.47  | 3.17 | 50% |
| 23759  | PPIL2    |   |   |   |  |  |     | NM_148176 | 11.72  | 3.17 | 50% |
| 80765  | STARD5   |   |   |   |  |  |     | NM_181900 | 40.56  | 3.19 | 50% |
| 3148   | HMGB2    |   |   |   |  |  |     | NM_002129 | 11.53  | 3.19 | 50% |
| 51053  | GMNN     |   |   |   |  |  |     | NM_015895 | 8.33   | 3.21 | 50% |
| 56888  | KCMF1    | Y |   |   |  |  |     | BC000178  | 15.47  | 3.21 | 50% |
| 257019 | FRMD3    | Y |   | Y |  |  |     | BC023560  | 13.61  | 3.21 | 50% |
| 2950   | GSTP1    |   |   |   |  |  | Y   | BC010915  | 24.78  | 3.24 | 50% |
| 6519   | SLC3A1   |   | Y | Y |  |  |     | NM_000341 | 14.75  | 3.24 | 50% |
| 5862   | RAB2A    |   |   |   |  |  |     | NM_002865 | 16.56  | 3.24 | 50% |
| 328    | APEX1    |   |   |   |  |  | Y   | NM_001641 | 24.31  | 3.25 | 50% |
| 58515  | SELK     |   |   |   |  |  |     | BC013162  | 19.78  | 3.26 | 50% |
| 11104  | KATNA1   |   | Y | Y |  |  |     | BC050428  | 23.72  | 3.27 | 50% |
| 51009  | DERL2    |   |   |   |  |  |     | NM_016041 | 10.72  | 3.28 | 50% |
| 23410  | SIRT3    |   |   |   |  |  |     | NM_012239 | 15.25  | 3.28 | 50% |
| 10636  | RGS14    |   |   |   |  |  |     | NM_006480 | 7.83   | 3.29 | 50% |
| 51083  | GAL      |   |   |   |  |  |     | NM_015973 | 18.86  | 3.29 | 50% |
| 54602  | NDFIP2   |   |   |   |  |  | Y   | BC026126  | 10.22  | 3.29 | 50% |
| 51005  | AMDHD2   |   |   |   |  |  |     | NM_015944 | 21.47  | 3.30 | 50% |
| 55037  | PTCD3    |   |   |   |  |  |     | NM_017952 | 25.08  | 3.30 | 50% |
| 6782   | STCH     |   |   |   |  |  |     | NM_006948 | 22.36  | 3.33 | 50% |
| 953    | ENTPD1   |   |   |   |  |  | Y Y | BC047664  | 11.86  | 3.33 | 50% |
| 54165  | DCUN1D1  |   |   |   |  |  |     | BC009478  | 20.53  | 3.35 | 50% |
| 7941   | PLA2G7   |   |   |   |  |  | Y   | NM_005084 | 30.61  | 3.36 | 50% |
| 11258  | DCTN3    |   |   |   |  |  |     | NM_024348 | 17.36  | 3.38 | 50% |
| 50862  | RNF141   |   |   |   |  |  |     | NM_016422 | 63.08  | 3.38 | 50% |
| 6500   | SKP1A    |   |   |   |  |  |     | NM_170679 | 14.42  | 3.39 | 50% |
| 219738 | C1orf35  |   |   |   |  |  |     | NM_145306 | 19.83  | 3.39 | 50% |
| 84335  | AKT1S1   |   | Y | Y |  |  |     | BC015562  | 14.67  | 3.39 | 50% |
| 50515  | CHST11   |   |   |   |  |  | Y   | NM_018413 | 12.33  | 3.40 | 50% |
| 11325  | DDX42    |   |   |   |  |  |     | BC015505  | 81.11  | 3.41 | 50% |
| 5023   | P2RX1    |   |   |   |  |  | Y   | NM_002558 | 7.44   | 3.42 | 50% |
| 3543   | IGLL1    |   |   |   |  |  | Y   | NM_020070 | 11.00  | 3.43 | 50% |
| 54     | ACP5     |   |   |   |  |  |     | NM_001611 | 10.22  | 3.44 | 50% |
| 6252   | RTN1     |   |   |   |  |  |     | NM_206852 | 9.03   | 3.44 | 50% |
| 8209   | C21orf33 |   | Y | Y |  |  |     | NM_004649 | 32.61  | 3.48 | 50% |
| 1263   | PLK3     | Y |   |   |  |  |     | NM_004073 | 43.31  | 3.51 | 50% |

|        |           |   |   |   |  |   |   |           |       |      |     |
|--------|-----------|---|---|---|--|---|---|-----------|-------|------|-----|
| 2642   | GCGR      |   |   |   |  |   |   | NM_000160 | 15.56 | 3.51 | 50% |
| 9578   | CDC42BPB  |   |   |   |  |   |   | NM_006035 | 11.92 | 3.51 | 50% |
| 658    | BMPR1B    |   |   |   |  | Y |   | NM_001203 | 48.72 | 3.53 | 50% |
| 22822  | PHLDA1    |   |   |   |  |   |   | BC018929  | 92.97 | 3.53 | 50% |
| 8715   | NOL4      |   |   |   |  |   |   | BC000313  | 19.39 | 3.53 | 50% |
| 6554   | SLC10A1   |   |   |   |  |   |   | NM_003049 | 13.06 | 3.53 | 50% |
| 374969 | CCDC23    |   |   |   |  |   |   | BC029427  | 19.89 | 3.54 | 50% |
| 157807 | MGC34646  |   |   |   |  | Y |   | NM_173519 | 36.28 | 3.55 | 50% |
| 29978  | UBQLN2    |   |   |   |  |   |   | NM_013444 | 25.64 | 3.55 | 50% |
| 128153 | SPATA17   |   |   |   |  |   |   | NM_138796 | 14.72 | 3.55 | 50% |
| 10635  | RAD51AP1  |   |   |   |  |   |   | NM_006479 | 13.92 | 3.57 | 50% |
| 23683  | PRKD3     |   |   |   |  |   |   | NM_005813 | 15.19 | 3.58 | 50% |
| 1073   | CFL2      |   |   |   |  | Y |   | NM_021914 | 10.94 | 3.59 | 50% |
| 85458  | DIXDC1    |   |   |   |  | Y |   | BC033034  | 26.64 | 3.62 | 50% |
| 5939   | RBMS2     |   |   |   |  |   |   | NM_002898 | 14.89 | 3.63 | 50% |
| 3248   | HPGD      | Y |   |   |  |   | Y | NM_000860 | 14.67 | 3.64 | 50% |
| 55268  | ECHDC2    |   |   | Y |  |   |   | BC044574  | 38.25 | 3.65 | 50% |
| 92344  | SCYL1BP1  |   |   |   |  |   |   | BC064945  | 36.67 | 3.65 | 50% |
| 3093   | HIP2      |   |   |   |  |   |   | NM_005339 | 10.69 | 3.66 | 50% |
| 9099   | USP2      |   | Y |   |  |   |   | BC041366  | 26.67 | 3.67 | 50% |
| 29     | ABR       |   |   |   |  |   |   | NM_021962 | 22.08 | 3.68 | 50% |
| 2920   | CXCL2     |   |   |   |  |   |   | NM_002089 | 23.00 | 3.68 | 50% |
| 124801 | LSM12     |   |   |   |  |   |   | BC044587  | 13.56 | 3.69 | 50% |
| 133308 | LOC133308 |   |   |   |  |   | Y | NM_178833 | 18.19 | 3.72 | 50% |
| 151126 | ZNF533    |   | Y |   |  |   | Y | BC038422  | 17.03 | 3.74 | 50% |
| 29101  | SSU72     |   |   |   |  |   |   | NM_014188 | 19.81 | 3.74 | 50% |
| 2202   | EFEMP1    |   |   |   |  |   |   | NM_004105 | 13.36 | 3.77 | 50% |
| 10200  | MPHOSPH6  |   |   |   |  |   | Y | NM_005792 | 10.06 | 3.79 | 50% |
| 84680  | PHACS     |   |   |   |  |   |   | BC020197  | 24.00 | 3.80 | 50% |
| 54554  | WDR5B     |   |   |   |  |   |   | NM_019069 | 22.19 | 3.80 | 50% |
| 28951  | TRIB2     |   |   |   |  |   |   | NM_021643 | 24.58 | 3.87 | 50% |
| 143471 | PSMA8     |   |   |   |  |   | Y | BC042820  | 24.92 | 3.88 | 50% |
| 4711   | NDUFB5    |   |   |   |  |   |   | NM_002492 | 34.64 | 3.89 | 50% |
| 5533   | PPP3CC    |   |   |   |  |   |   | NM_005605 | 13.31 | 3.91 | 50% |
| 55544  | RBM38     |   |   |   |  |   |   | NM_017495 | 18.53 | 3.92 | 50% |
| 5536   | PPP5C     |   |   |   |  |   |   | NM_006247 | 19.08 | 3.92 | 50% |
| 6885   | MAP3K7    |   |   |   |  |   |   | NM_003188 | 9.58  | 3.92 | 50% |
| 22916  | NCBP2     |   |   |   |  |   |   | NM_007362 | 18.39 | 3.94 | 50% |
| 93979  | CPA5      |   |   |   |  |   |   | BC039362  | 9.64  | 3.99 | 50% |
| 1622   | DBI       |   |   | Y |  |   |   | NM_020548 | 18.42 | 4.04 | 50% |
| 1756   | DMD       |   |   |   |  |   | Y | NM_004016 | 13.47 | 4.05 | 50% |
| 987    | LRBA      |   |   |   |  |   |   | BC012535  | 17.61 | 4.06 | 50% |
| 4067   | LYN       |   |   |   |  |   |   | NM_002350 | 12.61 | 4.06 | 50% |
| 9958   | USP15     |   |   |   |  |   |   | BC020688  | 10.08 | 4.07 | 50% |
| 57698  | KIAA1598  |   |   |   |  |   | Y | NM_018330 | 14.50 | 4.08 | 50% |
| 5407   | PNLIPRP1  |   |   |   |  |   |   | BC025784  | 24.53 | 4.08 | 50% |
| 968    | CD68      |   |   |   |  |   | Y | BC015557  | 23.42 | 4.09 | 50% |
| 29841  | GRHL1     |   |   |   |  |   | Y | BC067519  | 11.00 | 4.10 | 50% |
| 2872   | MKNK2     |   |   |   |  |   |   | NM_017572 | 13.11 | 4.13 | 50% |
| 51100  | SH3GLB1   |   |   |   |  |   |   | NM_016009 | 15.78 | 4.16 | 50% |
| 84002  | B3GNT5    |   |   |   |  |   |   | NM_032047 | 12.53 | 4.24 | 50% |
| 84280  | BTBD10    |   |   |   |  |   |   | BC017072  | 31.19 | 4.25 | 50% |

|        |            |   |   |   |   |  |   |   |           |       |      |     |
|--------|------------|---|---|---|---|--|---|---|-----------|-------|------|-----|
| 65123  | INTS3      |   |   |   |   |  |   |   | BC025254  | 12.06 | 4.27 | 50% |
| 64793  | CCDC21     |   |   |   |   |  |   |   | BC019902  | 15.31 | 4.27 | 50% |
| 51322  | WAC        |   |   |   |   |  |   |   | BC010356  | 46.72 | 4.27 | 50% |
| 3376   | IARS       |   |   |   |   |  |   |   | BC008318  | 13.86 | 4.32 | 50% |
| 660    | BMX        |   |   |   |   |  |   |   | NM_001721 | 13.22 | 4.44 | 50% |
| 3068   | HDGF       |   |   |   |   |  |   |   | NM_004494 | 16.03 | 4.47 | 50% |
| 8337   | HIST2H2AA3 |   |   |   |   |  |   |   | NM_003516 | 10.47 | 4.48 | 50% |
| 219928 | MRGPRF     | Y |   |   |   |  |   | Y | BC016964  | 9.92  | 4.57 | 50% |
| 10098  | TSPAN5     |   |   |   |   |  | Y |   | NM_005723 | 11.53 | 4.61 | 50% |
| 51167  | CYB5R4     |   |   |   |   |  |   |   | NM_016230 | 8.50  | 4.64 | 50% |
| 2968   | GTF2H4     |   |   |   |   |  |   |   | NM_001517 | 12.53 | 4.64 | 50% |
| 7122   | CLDN5      | Y |   |   |   |  |   |   | NM_003277 | 7.39  | 4.68 | 50% |
| 98     | ACYP2      |   |   |   |   |  |   |   | NM_138448 | 20.67 | 4.73 | 50% |
| 84851  | TRIM52     |   |   |   |   |  |   |   | NM_032765 | 8.78  | 4.76 | 50% |
| 84572  | GNPTG      |   |   |   |   |  |   |   | BC014592  | 12.14 | 4.86 | 50% |
| 10776  | ARPP-19    |   |   |   |   |  |   |   | NM_006628 | 9.14  | 4.86 | 50% |
| 6836   | SURF4      |   |   |   |   |  |   |   | NM_033161 | 8.19  | 4.89 | 50% |
| 983    | CDC2       |   |   |   |   |  |   |   | NM_001786 | 14.81 | 4.95 | 50% |
| 25788  | RAD54B     |   |   |   |   |  |   |   | BC033710  | 10.69 | 4.97 | 50% |
| 3312   | HSPA8      |   |   |   |   |  |   |   | NM_006597 | 5.72  | 5.01 | 50% |
| 23358  | USP24      |   |   |   |   |  |   |   | BC029660  | 10.83 | 5.06 | 50% |
| 84455  | KIAA1799   |   |   |   |   |  |   |   | BC015814  | 4.94  | 5.08 | 50% |
| 10474  | TADA3L     |   |   |   |   |  |   |   | NM_133480 | 20.22 | 5.10 | 50% |
| 10950  | BTG3       |   |   |   |   |  |   |   | BC011957  | 11.64 | 5.11 | 50% |
| 83544  | DNAL1      |   |   |   |   |  |   |   | NM_031427 | 5.58  | 5.19 | 50% |
| 4331   | MNAT1      |   |   |   |   |  |   |   | NM_002431 | 38.39 | 5.23 | 50% |
| 8303   | SNN        |   |   |   |   |  |   |   | NM_003498 | 8.19  | 5.26 | 50% |
| 117177 | RAB3IP     |   |   |   |   |  |   |   | BC015548  | 8.11  | 5.29 | 50% |
| 3340   | NDST1      |   |   |   |   |  |   |   | BC012888  | 8.75  | 5.32 | 50% |
| 2280   | FKBP1A     |   |   |   |   |  |   |   | NM_000801 | 8.72  | 5.32 | 50% |
| 414061 | HCG3       |   | Y | Y |   |  |   |   | BC024013  | 9.03  | 5.58 | 50% |
| 10771  | ZMYND11    |   |   |   |   |  |   |   | BC034784  | 11.36 | 5.61 | 50% |
| 117583 | PARD3B     |   |   |   |   |  |   |   | BC012984  | 8.75  | 5.63 | 50% |
| 375484 | C5orf25    |   |   |   |   |  |   |   | NM_198567 | 12.58 | 5.65 | 50% |
| 84641  | HIATL1     |   |   |   |   |  |   |   | BC021093  | 11.28 | 5.68 | 50% |
| 25864  | ABHD14A    |   | Y |   |   |  |   |   | NM_015407 | 14.47 | 5.79 | 50% |
| 25926  | NOL11      |   |   |   |   |  |   |   | BC001726  | 10.33 | 5.81 | 50% |
| 3660   | IRF2       |   |   |   |   |  |   |   | BC015803  | 10.72 | 5.91 | 50% |
| 6396   | SEC13      |   |   |   | Y |  |   |   | NM_030673 | 9.19  | 5.97 | 50% |
| 6540   | SLC6A13    |   | Y | Y |   |  |   |   | BC020867  | 18.69 | 6.00 | 50% |
| 8760   | CDS2       |   |   |   |   |  |   |   | NM_003818 | 9.69  | 6.06 | 50% |
| 5437   | POLR2H     |   |   |   |   |  |   |   | NM_006232 | 4.81  | 6.12 | 50% |
| 6217   | RPS16      |   |   |   |   |  |   | Y | NM_001020 | 10.00 | 6.15 | 50% |
| 3984   | LIMK1      |   |   |   |   |  | Y |   | NM_002314 | 12.86 | 6.20 | 50% |
| 11158  | RABL2B     |   |   |   |   |  |   |   | BC024281  | 7.53  | 6.30 | 50% |
| 151903 | CCDC12     |   |   |   |   |  |   |   | NM_144716 | 22.39 | 6.30 | 50% |
| 53615  | MBD3       |   |   |   |   |  |   |   | BC043619  | 20.14 | 6.35 | 50% |
| 5586   | PKN2       |   |   |   |   |  |   |   | NM_006256 | 7.50  | 6.35 | 50% |
| 2618   | GART       |   |   |   |   |  |   |   | NM_175085 | 11.11 | 6.45 | 50% |
| 506    | ATP5B      |   |   |   |   |  |   |   | NM_001686 | 3.36  | 6.62 | 50% |
| 115817 | DHRS1      |   |   |   |   |  |   |   | BC014057  | 8.14  | 6.64 | 50% |
| 54925  | ZNF434     |   |   |   |   |  |   |   | BC002859  | 15.89 | 6.81 | 50% |

|        |          |   |   |   |  |   |   |   |           |       |       |     |
|--------|----------|---|---|---|--|---|---|---|-----------|-------|-------|-----|
| 1641   | DCX      |   |   |   |  |   |   |   | NM_178152 | 9.72  | 6.83  | 50% |
| 55145  | THAP1    |   |   |   |  |   |   |   | NM_018105 | 8.97  | 7.06  | 50% |
| 9733   | SART3    |   |   |   |  |   |   |   | BC041638  | 8.56  | 7.08  | 50% |
| 54978  | C2orf18  |   |   | Y |  |   |   |   | NM_017877 | 15.36 | 7.29  | 50% |
| 6772   | STAT1    |   |   |   |  |   |   |   | BC002704  | 7.50  | 7.30  | 50% |
| 81831  | NETO2    |   |   |   |  |   |   |   | BC012381  | 9.22  | 7.49  | 50% |
| 5612   | PRKRIR   |   |   |   |  |   |   |   | BC021992  | 6.86  | 7.54  | 50% |
| 3964   | LGALS8   |   |   |   |  |   |   |   | BC014452  | 6.53  | 7.65  | 50% |
| 4689   | NCF4     |   |   |   |  |   | Y |   | NM_013416 | 11.72 | 7.99  | 50% |
| 10574  | CCT7     |   |   |   |  |   |   |   | NM_006429 | 7.31  | 8.13  | 50% |
| 57010  | CABP4    |   |   |   |  |   |   |   | BC033167  | 5.19  | 8.49  | 50% |
| 9270   | ITGB1BP1 |   |   |   |  | Y |   |   | BC012264  | 6.72  | 8.50  | 50% |
| 28511  | NKIRAS2  |   |   |   |  |   |   |   | NM_017595 | 28.69 | 8.54  | 50% |
| 84529  | C15orf41 |   |   |   |  |   |   |   | NM_032499 | 6.58  | 8.80  | 50% |
| 29085  | PHPT1    |   |   |   |  |   |   |   | NM_014172 | 6.08  | 8.88  | 50% |
| 79947  | DHDDS    |   |   | Y |  |   |   |   | BC004117  | 7.50  | 9.15  | 50% |
| 7124   | TNF      |   |   |   |  |   |   |   | NM_000594 | 24.08 | 9.43  | 50% |
| 79669  | C3orf52  |   |   |   |  |   | Y |   | BC017064  | 3.64  | 9.48  | 50% |
| 8019   | BRD3     |   |   |   |  |   |   |   | BC032124  | 6.61  | 9.53  | 50% |
| 112609 | C6orf117 |   |   |   |  |   |   |   | BC039855  | 7.22  | 9.53  | 50% |
| 10611  | PDLIM5   |   |   |   |  |   |   |   | BC008741  | 13.17 | 9.76  | 50% |
| 1556   | CYP2B7P1 |   |   | Y |  |   |   |   | BC041174  | 3.81  | 9.78  | 50% |
| 125    | ADH1B    |   |   |   |  |   | Y | Y | BC033009  | 6.42  | 9.81  | 50% |
| 9910   | RABGAP1L |   |   |   |  |   |   |   | BC012094  | 5.53  | 9.92  | 50% |
| 1195   | CLK1     |   |   |   |  |   |   |   | NM_004071 | 6.78  | 9.93  | 50% |
| 90379  | LOC90379 |   |   |   |  |   |   |   | NM_138353 | 3.22  | 9.94  | 50% |
| 79912  | FLJ22028 |   |   |   |  |   |   |   | NM_024854 | 5.89  | 10.00 | 50% |
| 3791   | KDR      |   |   |   |  |   |   |   | NM_002253 | 3.92  | 10.31 | 50% |
| 79007  | DBNDD1   |   |   |   |  |   |   |   | NM_024043 | 4.44  | 10.46 | 50% |
| 10480  | PCID1    |   |   |   |  |   |   |   | NM_006360 | 3.83  | 10.47 | 50% |
| 64840  | PORCN    |   |   |   |  |   |   |   | BC019080  | 2.94  | 10.59 | 50% |
| 2534   | FYN      | Y |   |   |  |   |   | Y | NM_002037 | 7.25  | 10.62 | 50% |
| 644    | BLVRA    |   |   |   |  |   |   |   | BC005902  | 3.47  | 11.09 | 50% |
| 11313  | LYPLA2   |   |   |   |  |   |   |   | NM_007260 | 7.94  | 11.19 | 50% |
| 79823  | C2orf34  |   |   |   |  |   |   |   | BC029359  | 3.72  | 12.08 | 50% |
| 51552  | RAB14    |   |   |   |  |   |   |   | NM_016322 | 2.56  | 12.29 | 50% |
| 30008  | EFEMP2   |   |   |   |  |   |   |   | BC010456  | 3.25  | 12.70 | 50% |
| 9529   | BAG5     |   |   |   |  |   |   |   | NM_004873 | 8.14  | 13.13 | 50% |
| 1750   | DLX6     |   |   |   |  |   |   |   | BC069363  | 4.19  | 13.41 | 50% |
| 55332  | DRAM     |   |   |   |  |   |   |   | NM_018370 | 4.64  | 13.49 | 50% |
| 9338   | TCEAL1   |   |   |   |  |   |   |   | BC000809  | 7.67  | 13.84 | 50% |
| 660    | BMX      |   |   |   |  |   |   |   | NM_001721 | 4.03  | 15.48 | 50% |
| 134147 | CMBL     |   | Y | Y |  |   |   |   | NM_138809 | 5.08  | 15.95 | 50% |
| 57826  | RAP2C    |   |   |   |  |   |   |   | BC003403  | 4.25  | 16.42 | 50% |
| 6482   | ST3GAL1  |   |   | Y |  |   |   |   | NM_173344 | 2.97  | 17.35 | 50% |
| 55273  | TMEM100  |   |   |   |  |   |   | Y | BC010128  | 3.39  | 18.15 | 50% |
| 2051   | EPHB6    |   |   |   |  |   |   | Y | NM_004445 | 1.50  | 18.81 | 50% |
| 10813  | UTP14A   |   |   |   |  |   |   |   | BC001149  | 4.67  | 25.32 | 50% |
| 7922   | SLC39A7  |   |   |   |  |   |   |   | BC000645  | 3.11  | 25.37 | 50% |
| 51478  | HSD17B7  |   |   |   |  |   |   |   | NM_016371 | 1.00  | 26.90 | 50% |
| 65979  | PHACTR4  | Y |   |   |  |   |   |   | BC021247  | 3.86  | 29.51 | 50% |
| 1992   | SERPINB1 |   |   |   |  |   |   |   | BC009015  | 1.61  | 30.49 | 50% |

|        |               |  |   |   |  |  |   |           |        |         |     |
|--------|---------------|--|---|---|--|--|---|-----------|--------|---------|-----|
| 1357   | CPA1          |  |   |   |  |  |   | BC005279  | 1.25   | 31.51   | 50% |
| 6660   | SOX5          |  |   |   |  |  | Y | BC060773  | 9.69   | 37.75   | 50% |
| 64173  | SPATA1        |  |   |   |  |  |   | BC064144  | 0.72   | 38.12   | 50% |
| 5361   | PLXNA1        |  |   |   |  |  |   | BC032432  | 0.75   | 39.88   | 50% |
| 1491   | CTH           |  |   |   |  |  |   | NM_001902 | 5.17   | 40.67   | 50% |
| 8266   | UBL4A         |  |   |   |  |  |   | BC043346  | 1.61   | 53.95   | 50% |
| 8621   | CDC2L5        |  |   |   |  |  |   | BC001274  | 0.72   | 66.99   | 50% |
| 2730   | GCLM          |  |   |   |  |  |   | NM_002061 | 0.83   | 78.38   | 50% |
| 84315  | MON1A         |  |   |   |  |  |   | BC047022  | 0.78   | 84.28   | 50% |
| 122970 | ACOT4         |  |   | Y |  |  |   | BC031799  | 0.39   | 104.54  | 50% |
| 10242  | KCNMB2        |  | Y |   |  |  |   | NM_005832 | 0.33   | 107.67  | 50% |
| 58493  | C9orf80       |  |   |   |  |  |   | NM_021218 | 0.67   | 119.98  | 50% |
| 65993  | MRPS34        |  |   |   |  |  |   | NM_023936 | 0.72   | 147.77  | 50% |
| 158427 | C9orf97       |  |   |   |  |  |   | BC022958  | 0.42   | 174.28  | 50% |
| 6206   | RPS12         |  |   |   |  |  | Y | NM_001016 | 0.06   | 375.44  | 50% |
| 161514 | TBC1D21       |  |   |   |  |  |   | NM_153356 | -0.47  | -228.16 | 44% |
| 27086  | FOXP1         |  |   |   |  |  | Y | BC005055  | -0.42  | -160.95 | 44% |
| 10140  | TOB1          |  |   |   |  |  |   | NM_005749 | -0.58  | -90.72  | 44% |
| 9978   | RBX1          |  |   |   |  |  |   | NM_014248 | -1.42  | -71.78  | 44% |
| 8895   | CPNE3         |  |   |   |  |  |   | BC036242  | -0.78  | -62.66  | 44% |
| 4710   | NDUFB4        |  |   |   |  |  |   | NM_004547 | -0.39  | -59.61  | 44% |
| 80381  | CD276         |  |   |   |  |  |   | BC011578  | -2.08  | -34.32  | 44% |
| 7360   | UGP2          |  |   | Y |  |  |   | BC002954  | -2.81  | -31.67  | 44% |
| 64118  | DUS1L         |  |   |   |  |  |   | NM_022156 | -1.00  | -27.66  | 44% |
| 432    | ASGR1         |  |   |   |  |  | Y | NM_001671 | -2.78  | -25.05  | 44% |
| 311    | ANXA11        |  |   |   |  |  |   | NM_001157 | -2.44  | -23.95  | 44% |
| 51283  | BFAR          |  |   | Y |  |  |   | NM_016561 | -2.69  | -21.71  | 44% |
| 8935   | SKAP2         |  |   |   |  |  |   | NM_003930 | -2.08  | -18.22  | 44% |
| 84294  | C8orf53       |  |   |   |  |  |   | BC005955  | -9.31  | -16.82  | 44% |
| 5537   | PPP6C         |  |   |   |  |  |   | NM_002721 | -2.86  | -15.87  | 44% |
| 1956   | EGFR          |  |   |   |  |  |   | NP_005219 | -4.06  | -14.90  | 44% |
| 51778  | MYOZ2         |  |   |   |  |  |   | NM_016599 | -3.53  | -14.77  | 44% |
| 54957  | TXNL4B        |  |   |   |  |  |   | NM_017853 | -4.25  | -14.49  | 44% |
| 4656   | MYOG          |  |   |   |  |  |   | NM_002479 | -12.42 | -13.54  | 44% |
| 26276  | VPS33B        |  |   |   |  |  |   | NM_018668 | -2.67  | -13.18  | 44% |
| 165100 | MGC35154      |  |   |   |  |  |   | NM_152614 | -5.86  | -12.94  | 44% |
| 1297   | COL9A1        |  |   |   |  |  |   | BC015409  | -21.19 | -9.34   | 44% |
| 26286  | ARFGAP3       |  |   |   |  |  |   | NM_014570 | -7.36  | -9.09   | 44% |
| 5511   | PPP1R8        |  |   |   |  |  |   | NM_014110 | -7.69  | -8.79   | 44% |
| 285282 | RABL3         |  |   |   |  |  |   | NM_173825 | -19.11 | -8.53   | 44% |
| 7518   | XRCC4         |  |   |   |  |  |   | BC005259  | -5.61  | -8.47   | 44% |
| 57132  | CHMP1B        |  |   |   |  |  | Y | NM_020412 | -5.08  | -7.70   | 44% |
| 55621  | TRMT1         |  |   |   |  |  |   | BC018302  | -19.08 | -7.47   | 44% |
| 1641   | DCX           |  |   |   |  |  |   | NM_178152 | -43.81 | -7.36   | 44% |
| 6907   | TBL1X         |  |   |   |  |  |   | BC032708  | -23.69 | -6.93   | 44% |
| 55333  | SYNJ2BP       |  |   |   |  |  |   | BC007704  | -6.31  | -6.52   | 44% |
| 1676   | DFFA          |  |   |   |  |  |   | NM_004401 | -8.03  | -6.47   | 44% |
| 25911  | RP11-529I10.4 |  |   |   |  |  |   | BC031695  | -10.53 | -6.18   | 44% |
| 25852  | ARMC8         |  |   |   |  |  |   | BC013424  | -7.22  | -5.96   | 44% |
| 1558   | CYP2C8        |  |   | Y |  |  |   | BC020596  | -33.53 | -5.71   | 44% |
| 80723  | TMEM22        |  |   |   |  |  |   | BC000111  | -10.08 | -5.62   | 44% |
| 56985  | C17orf48      |  |   |   |  |  |   | BC001294  | -60.22 | -5.27   | 44% |

|        |          |   |   |   |  |   |   |           |         |       |     |
|--------|----------|---|---|---|--|---|---|-----------|---------|-------|-----|
| 6227   | RPS21    |   |   |   |  |   | Y | BC018140  | -53.39  | -5.25 | 44% |
| 56829  | ZC3HAV1  |   |   |   |  |   |   | NM_024625 | -15.33  | -4.84 | 44% |
| 3098   | HK1      |   |   |   |  |   | Y | BC008730  | -44.11  | -4.73 | 44% |
| 29110  | TBK1     |   |   |   |  |   |   | NM_013254 | -92.42  | -4.13 | 44% |
| 57460  | PPM1H    |   |   |   |  |   |   | BC040177  | -216.36 | -4.09 | 44% |
| 3646   | EIF3S6   |   |   |   |  |   | Y | BC005944  | -157.42 | -3.86 | 44% |
| 2954   | GSTZ1    |   | Y | Y |  |   |   | NM_145870 | -125.42 | -3.05 | 44% |
| 51368  | TEX264   |   |   |   |  |   |   | NM_015926 | -18.72  | -2.97 | 44% |
| 79598  | LRRIQ2   |   |   |   |  |   |   | NM_024548 | 37.39   | 2.18  | 44% |
| 25953  | PNKD     |   |   |   |  |   |   | NM_015488 | 16.17   | 2.29  | 44% |
| 51056  | LAP3     |   |   |   |  |   |   | BC006199  | 24.89   | 2.35  | 44% |
| 9641   | IKBKE    |   |   |   |  |   |   | NM_014002 | 16.39   | 2.36  | 44% |
| 140459 | ASB6     |   |   |   |  |   |   | NM_177999 | 15.67   | 2.42  | 44% |
| 4792   | NFKBIA   |   |   |   |  |   |   | NM_020529 | 13.81   | 2.47  | 44% |
| 10581  | IFITM2   | Y |   |   |  |   |   | BC009696  | 31.03   | 2.50  | 44% |
| 9501   | RPH3AL   |   |   |   |  |   |   | BC005153  | 74.89   | 2.52  | 44% |
| 10981  | RAB32    |   |   |   |  |   |   | NM_006834 | 40.75   | 2.53  | 44% |
| 29941  | PKN3     |   |   |   |  |   |   | NM_013355 | 24.06   | 2.53  | 44% |
| 302    | ANXA2    |   |   |   |  | Y | Y | BC023990  | 20.47   | 2.59  | 44% |
| 5592   | PRKG1    | Y |   |   |  |   | Y | BC062688  | 28.81   | 2.61  | 44% |
| 5281   | PIGF     |   |   |   |  |   |   | NM_173074 | 28.19   | 2.65  | 44% |
| 10248  | POP7     |   |   |   |  |   |   | BC001430  | 31.19   | 2.66  | 44% |
| 51263  | MRPL30   |   |   |   |  |   |   | NM_145212 | 16.39   | 2.68  | 44% |
| 204    | AK2      |   |   |   |  |   |   | NM_001625 | 30.14   | 2.69  | 44% |
| 29927  | SEC61A1  |   |   |   |  |   |   | BC002951  | 28.81   | 2.71  | 44% |
| 9976   | CLEC2B   |   |   |   |  |   | Y | BC005254  | 17.89   | 2.73  | 44% |
| 55568  | GALNT10  |   |   | Y |  |   |   | BC007224  | 27.42   | 2.75  | 44% |
| 6648   | SOD2     |   |   |   |  |   |   | BC016934  | 23.72   | 2.76  | 44% |
| 27010  | TPK1     |   |   |   |  |   |   | BC068460  | 19.39   | 2.80  | 44% |
| 9915   | ARNT2    |   |   |   |  |   |   | BC036099  | 37.39   | 2.81  | 44% |
| 254295 | PHYHD1   |   |   |   |  |   |   | BC053853  | 21.58   | 2.83  | 44% |
| 128240 | APOA1BP  |   |   |   |  |   |   | BC056917  | 18.25   | 2.86  | 44% |
| 10842  | C7orf16  |   |   |   |  |   |   | NM_006658 | 76.03   | 2.86  | 44% |
| 79870  | BAALC    |   |   |   |  |   |   | NM_024812 | 10.94   | 2.91  | 44% |
| 4343   | MOV10    |   |   |   |  |   |   | NM_020963 | 26.06   | 2.94  | 44% |
| 283377 | SPRYD4   |   |   |   |  |   |   | BC020844  | 14.83   | 2.94  | 44% |
| 55572  | FOXRED1  |   |   |   |  |   |   | BC013902  | 11.17   | 2.94  | 44% |
| 8431   | NROB2    |   |   |   |  |   |   | NM_021969 | 8.75    | 2.95  | 44% |
| 79887  | FLJ22662 |   |   |   |  |   | Y | BC000909  | 15.78   | 2.99  | 44% |
| 55751  | TMEM34   |   |   |   |  |   |   | BC046128  | 15.67   | 2.99  | 44% |
| 309    | ANXA6    |   |   |   |  |   | Y | BC017046  | 33.33   | 3.00  | 44% |
| 9093   | DNAJA3   |   |   |   |  |   |   | NM_005147 | 17.11   | 3.01  | 44% |
| 8851   | CDK5R1   |   |   |   |  |   | Y | NM_003885 | 8.81    | 3.03  | 44% |
| 9043   | SPAG9    |   |   |   |  |   |   | BC007524  | 34.78   | 3.04  | 44% |
| 51573  | MIR16    |   |   |   |  |   |   | NM_016641 | 50.89   | 3.05  | 44% |
| 466    | ATF1     |   |   |   |  |   |   | NM_005171 | 23.25   | 3.06  | 44% |
| 84314  | TMEM107  |   |   |   |  |   |   | NM_032354 | 13.72   | 3.11  | 44% |
| 11285  | B4GALT7  |   |   |   |  |   |   | NM_007255 | 15.47   | 3.13  | 44% |
| 94107  | MGC14327 |   |   |   |  |   |   | NM_053045 | 16.25   | 3.14  | 44% |
| 54555  | DDX49    |   |   |   |  |   |   | BC000979  | 40.42   | 3.16  | 44% |
| 51128  | SAR1B    |   |   |   |  |   |   | NM_016103 | 25.64   | 3.17  | 44% |
| 50865  | HEBP1    |   |   |   |  |   |   | NM_015987 | 22.50   | 3.17  | 44% |

|        |           |   |   |   |  |  |   |   |           |       |      |     |
|--------|-----------|---|---|---|--|--|---|---|-----------|-------|------|-----|
| 440193 | KIAA1509  |   |   |   |  |  |   | Y | BC028565  | 47.72 | 3.18 | 44% |
| 10577  | NPC2      |   |   |   |  |  |   |   | NM_006432 | 14.03 | 3.22 | 44% |
| 5908   | RAP1B     |   |   |   |  |  |   |   | NM_015646 | 17.06 | 3.23 | 44% |
| 83659  | TEKT1     |   |   |   |  |  |   |   | NM_053285 | 34.78 | 3.31 | 44% |
| 83648  | C8orf13   |   |   |   |  |  |   |   | BC048214  | 13.39 | 3.34 | 44% |
| 51204  | CCDC44    |   |   |   |  |  |   |   | NM_016360 | 17.14 | 3.37 | 44% |
| 2948   | GSTM4     |   |   |   |  |  |   |   | NM_000850 | 10.00 | 3.42 | 44% |
| 51188  | SS18L2    |   |   |   |  |  |   |   | NM_016305 | 12.22 | 3.44 | 44% |
| 85450  | KIAA1754  | Y |   |   |  |  |   |   | NM_033397 | 13.92 | 3.51 | 44% |
| 10533  | ATG7      |   |   |   |  |  |   |   | BC000091  | 18.58 | 3.52 | 44% |
| 9400   | RECQL5    |   |   |   |  |  |   | Y | BC016911  | 14.31 | 3.56 | 44% |
| 5127   | PCTK1     |   |   |   |  |  |   |   | BC001048  | 31.17 | 3.60 | 44% |
| 201163 | FLCN      |   |   |   |  |  |   |   | BC015725  | 18.25 | 3.65 | 44% |
| 57696  | DDX55     |   |   |   |  |  |   |   | BC035911  | 37.03 | 3.71 | 44% |
| 5725   | PTBP1     |   |   |   |  |  |   |   | NM_031991 | 31.78 | 3.74 | 44% |
| 5058   | PAK1      |   |   |   |  |  |   |   | BC050377  | 12.61 | 3.77 | 44% |
| 1735   | DIO3      |   |   |   |  |  |   |   | BC017717  | 12.67 | 3.78 | 44% |
| 51103  | NDUFAF1   |   |   |   |  |  |   |   | NM_016013 | 18.89 | 3.79 | 44% |
| 254251 | LCORL     |   |   |   |  |  |   |   | BC037322  | 12.64 | 3.84 | 44% |
| 348840 | LOC348840 |   |   |   |  |  |   |   | NM_182631 | 22.00 | 3.90 | 44% |
| 283635 | C14orf24  |   |   |   |  |  |   |   | NM_173607 | 36.83 | 3.95 | 44% |
| 125875 | CLDND2    |   |   |   |  |  |   |   | NM_152353 | 9.47  | 3.97 | 44% |
| 10063  | COX17     |   |   |   |  |  |   |   | NM_005694 | 20.33 | 4.02 | 44% |
| 84870  | RSPO3     |   |   |   |  |  | Y | Y | NM_032784 | 19.69 | 4.03 | 44% |
| 255101 | CCDC108   |   |   |   |  |  |   |   | NM_152389 | 13.83 | 4.04 | 44% |
| 51604  | PIGT      |   |   |   |  |  |   |   | NM_015937 | 7.94  | 4.20 | 44% |
| 147372 | CCBE1     |   |   |   |  |  |   |   | BC046645  | 14.47 | 4.26 | 44% |
| 54986  | ULK4      |   |   | Y |  |  |   |   | BC014794  | 10.89 | 4.32 | 44% |
| 359    | AQP2      |   |   |   |  |  |   | Y | NM_000486 | 16.11 | 4.32 | 44% |
| 23612  | PHLDA3    |   |   |   |  |  |   |   | NM_012396 | 8.67  | 4.34 | 44% |
| 10769  | PLK2      |   |   |   |  |  |   |   | BC013879  | 20.92 | 4.39 | 44% |
| 56927  | GPR108    | Y |   |   |  |  |   |   | BC007862  | 12.56 | 4.39 | 44% |
| 27079  | RPUSD2    |   |   |   |  |  |   |   | BC016967  | 28.28 | 4.40 | 44% |
| 902    | CCNH      |   |   |   |  |  |   |   | NM_001239 | 8.89  | 4.41 | 44% |
| 79098  | C1orf116  |   |   |   |  |  |   | Y | NM_023938 | 11.81 | 4.43 | 44% |
| 2047   | EPHB1     |   | Y | Y |  |  |   |   | NM_004441 | 19.39 | 4.43 | 44% |
| 54432  | YIPF1     |   |   |   |  |  |   |   | BC009674  | 9.50  | 4.47 | 44% |
| 29106  | SCG3      |   |   |   |  |  |   | Y | BC014539  | 9.56  | 4.50 | 44% |
| 8895   | CPNE3     |   |   |   |  |  |   |   | BC036242  | 12.33 | 4.54 | 44% |
| 4099   | MAG       |   |   |   |  |  |   |   | BC053347  | 14.58 | 4.56 | 44% |
| 4282   | MIF       |   |   |   |  |  |   |   | NM_002415 | 8.08  | 4.62 | 44% |
| 2036   | EPB41L1   |   |   |   |  |  |   |   | NM_177996 | 49.33 | 4.63 | 44% |
| 55328  | C10orf59  |   |   |   |  |  |   |   | BC005364  | 20.39 | 4.65 | 44% |
| 51705  | EMCN      | Y |   |   |  |  |   |   | BC017781  | 44.28 | 4.66 | 44% |
| 201516 | ZSCAN4    |   |   |   |  |  |   |   | NM_152677 | 12.36 | 4.71 | 44% |
| 9991   | ROD1      |   |   |   |  |  |   | Y | BC044585  | 13.19 | 4.79 | 44% |
| 28972  | SPCS1     |   |   |   |  |  |   |   | BC000884  | 7.94  | 4.80 | 44% |
| 3053   | SERPIND1  |   |   |   |  |  |   |   | BC035028  | 8.92  | 4.83 | 44% |
| 2825   | GPR1      |   |   |   |  |  |   |   | BC058005  | 8.39  | 4.85 | 44% |
| 9638   | FEZ1      |   |   |   |  |  |   |   | NM_005103 | 8.61  | 4.85 | 44% |
| 57863  | CADM3     |   |   |   |  |  |   | Y | BC033819  | 7.69  | 4.87 | 44% |
| 11226  | GALNT6    |   |   |   |  |  |   |   | BC035822  | 8.36  | 4.89 | 44% |

|        |           |   |   |   |  |  |   |  |           |       |       |     |
|--------|-----------|---|---|---|--|--|---|--|-----------|-------|-------|-----|
| 80169  | C17orf68  |   |   |   |  |  |   |  | NM_025099 | 6.72  | 4.96  | 44% |
| 11133  | KPTN      |   |   |   |  |  |   |  | BC009249  | 6.31  | 5.00  | 44% |
| 6882   | TAF11     |   |   |   |  |  |   |  | NM_005643 | 8.56  | 5.09  | 44% |
| 55364  | IMPACT    |   |   |   |  |  |   |  | NM_018439 | 10.44 | 5.10  | 44% |
| 51762  | RAB8B     |   |   |   |  |  | Y |  | NM_016530 | 14.28 | 5.16  | 44% |
| 220042 | FLJ25416  |   |   |   |  |  | Y |  | NM_145018 | 11.17 | 5.17  | 44% |
| 65082  | VPS33A    |   |   |   |  |  |   |  | NM_022916 | 17.00 | 5.18  | 44% |
| 27012  | KCNV1     |   |   |   |  |  |   |  | BC028739  | 8.28  | 5.23  | 44% |
| 79665  | DHX40     |   |   |   |  |  |   |  | BC024187  | 21.11 | 5.32  | 44% |
| 84950  | PRPF38A   |   |   |   |  |  |   |  | NM_032284 | 16.00 | 5.43  | 44% |
| 5208   | PFKFB2    |   | Y | Y |  |  |   |  | NM_006212 | 10.31 | 5.59  | 44% |
| 583    | BBS2      |   |   |   |  |  |   |  | BC014140  | 11.44 | 5.64  | 44% |
| 219899 | TBCEL     |   |   |   |  |  |   |  | NM_152715 | 9.11  | 5.65  | 44% |
| 25979  | DHRS7B    |   |   |   |  |  |   |  | NM_015510 | 9.75  | 5.70  | 44% |
| 64838  | FNDC4     |   |   |   |  |  | Y |  | NM_022823 | 8.86  | 5.93  | 44% |
| 7023   | TFAP4     |   |   |   |  |  |   |  | NM_003223 | 11.47 | 5.94  | 44% |
| 56901  | NDUFA4L2  |   |   |   |  |  | Y |  | NM_020142 | 13.89 | 6.01  | 44% |
| 10439  | OLFM1     |   |   |   |  |  | Y |  | NM_058199 | 9.44  | 6.14  | 44% |
| 6603   | SMARCD2   | Y |   |   |  |  |   |  | BC018953  | 7.11  | 6.27  | 44% |
| 4814   | NINJ1     |   |   |   |  |  |   |  | NM_004148 | 8.69  | 6.34  | 44% |
| 8434   | RECK      | Y |   |   |  |  | Y |  | BC060806  | 7.50  | 6.40  | 44% |
| 196410 | METTL7B   |   |   |   |  |  |   |  | NM_152637 | 10.89 | 6.43  | 44% |
| 1459   | CSNK2A2   |   |   |   |  |  |   |  | NM_001896 | 2.89  | 6.55  | 44% |
| 8896   | BUD31     |   |   |   |  |  |   |  | NM_003910 | 11.81 | 6.62  | 44% |
| 81544  | GDPD5     |   |   |   |  |  |   |  | BC020203  | 7.69  | 6.63  | 44% |
| 257019 | FRMD3     | Y |   | Y |  |  |   |  | BC023560  | 6.11  | 6.65  | 44% |
| 5356   | PLRG1     |   |   |   |  |  |   |  | BC020786  | 9.64  | 6.66  | 44% |
| 145264 | SERPINA12 |   |   |   |  |  | Y |  | NM_173850 | 12.92 | 6.67  | 44% |
| 23111  | SPG20     |   |   |   |  |  |   |  | BC047083  | 14.14 | 6.67  | 44% |
| 4013   | LOH11CR2A |   |   |   |  |  |   |  | BC001234  | 10.00 | 6.83  | 44% |
| 8536   | CAMK1     |   |   |   |  |  |   |  | NM_003656 | 9.61  | 7.05  | 44% |
| 8027   | STAM      |   |   |   |  |  |   |  | BC030586  | 37.00 | 7.12  | 44% |
| 57018  | CCNL1     |   |   |   |  |  |   |  | BC038394  | 8.03  | 7.21  | 44% |
| 134288 | TMEM174   | Y | Y | Y |  |  |   |  | NM_153217 | 7.56  | 7.25  | 44% |
| 9985   | REC8L1    |   |   |   |  |  | Y |  | BC010887  | 5.67  | 7.30  | 44% |
| 255394 | TCP11L2   |   |   |   |  |  |   |  | NM_152772 | 7.50  | 7.33  | 44% |
| 1725   | DHPS      |   |   |   |  |  |   |  | NM_001930 | 13.28 | 7.47  | 44% |
| 7076   | TIMP1     |   |   |   |  |  | Y |  | NM_003254 | 12.36 | 7.54  | 44% |
| 22907  | DHX30     |   |   |   |  |  |   |  | BC014237  | 4.33  | 7.59  | 44% |
| 22954  | TRIM32    |   |   |   |  |  |   |  | BC003154  | 13.44 | 7.66  | 44% |
| 5692   | PSMB4     |   |   |   |  |  |   |  | NM_002796 | 7.53  | 7.70  | 44% |
| 23406  | COTL1     |   |   | Y |  |  |   |  | NM_021149 | 21.83 | 7.72  | 44% |
| 55916  | NXT2      |   |   |   |  |  |   |  | BC014888  | 7.31  | 8.38  | 44% |
| 132001 | C3orf31   |   |   |   |  |  |   |  | NM_138807 | 9.58  | 8.59  | 44% |
| 8878   | SQSTM1    |   |   |   |  |  | Y |  | NM_003900 | 7.92  | 8.70  | 44% |
| 27249  | C2orf25   |   |   |   |  |  |   |  | BC000932  | 8.33  | 8.82  | 44% |
| 56954  | NIT2      |   | Y | Y |  |  |   |  | BC020620  | 15.56 | 9.17  | 44% |
| 78990  | OTUB2     |   |   |   |  |  | Y |  | BC009615  | 3.64  | 9.29  | 44% |
| 207    | AKT1      |   |   |   |  |  |   |  | BC000479  | 3.75  | 9.58  | 44% |
| 22818  | COPZ1     |   |   |   |  |  |   |  | NM_016057 | 25.53 | 9.99  | 44% |
| 50813  | COPS7A    |   |   |   |  |  |   |  | NM_016319 | 4.53  | 10.06 | 44% |
| 55143  | CDC48     |   |   |   |  |  |   |  | BC001651  | 3.92  | 10.72 | 44% |



|        |          |   |   |   |  |   |   |           |         |         |     |
|--------|----------|---|---|---|--|---|---|-----------|---------|---------|-----|
| 533    | ATP6V0B  |   |   |   |  |   |   | BC005876  | 4.31    | 11.67   | 44% |
| 55244  | FLJ10847 |   | Y | Y |  |   |   | BC058882  | 4.28    | 11.90   | 44% |
| 9886   | RHOBTB1  |   | Y | Y |  |   |   | NM_014836 | 3.58    | 13.50   | 44% |
| 10061  | ABCF2    |   |   |   |  |   |   | NM_007189 | 4.25    | 14.50   | 44% |
| 8894   | EIF2S2   |   |   |   |  |   |   | BC007888  | 4.56    | 15.18   | 44% |
| 25828  | TXN2     |   |   | Y |  |   |   | NM_012473 | 3.11    | 15.24   | 44% |
| 51155  | HN1      |   |   |   |  | Y |   | NM_016185 | 5.28    | 17.05   | 44% |
| 80152  | CENPT    |   |   |   |  |   |   | BC015202  | 2.92    | 19.11   | 44% |
| 7320   | UBE2B    |   |   |   |  |   |   | NM_003337 | 2.67    | 19.36   | 44% |
| 23589  | CARHSP1  |   |   |   |  |   |   | BC003366  | 3.44    | 20.22   | 44% |
| 3263   | HPX      |   |   |   |  |   |   | BC005395  | 2.94    | 25.58   | 44% |
| 253769 | WDR27    |   |   |   |  |   |   | BC040606  | 1.75    | 30.09   | 44% |
| 81614  | NIPA2    |   |   |   |  |   |   | NM_030922 | 1.53    | 52.55   | 44% |
| 10544  | PROCR    |   |   |   |  |   |   | BC014451  | 0.81    | 77.43   | 44% |
| 1994   | ELAVL1   |   |   |   |  |   |   | BC003376  | 0.61    | 82.23   | 44% |
| 5519   | PPP2R1B  |   |   | Y |  |   | Y | BC027596  | 0.53    | 86.44   | 44% |
| 54495  | TXNDC10  |   |   |   |  |   |   | BC032325  | 0.22    | 183.38  | 44% |
| 27338  | UBE2S    |   |   |   |  |   |   | BC004236  | 0.19    | 188.76  | 44% |
| 403    | ARL3     |   |   |   |  |   |   | NM_004311 | 0.39    | 202.01  | 44% |
| 369    | ARAF     |   |   |   |  |   |   | BC007514  | 0.14    | 246.69  | 44% |
| 55     | ACPP     |   | Y |   |  |   |   | BC008493  | 0.06    | 446.86  | 44% |
| 51706  | CYB5R1   |   |   |   |  |   |   | BC018732  | -0.17   | -224.21 | 39% |
| 290    | ANPEP    |   | Y | Y |  |   |   | NM_001150 | -0.61   | -216.58 | 39% |
| 79027  | ZNF655   |   |   |   |  |   | Y | NM_024061 | -0.86   | -51.86  | 39% |
| 156    | ADRBK1   |   |   |   |  |   |   | NM_001619 | -1.19   | -43.57  | 39% |
| 10978  | CLP1     |   |   |   |  |   |   | NM_006831 | -4.03   | -30.09  | 39% |
| 51806  | CALML5   |   |   |   |  |   | Y | BC039172  | -2.75   | -25.89  | 39% |
| 11011  | TLK2     |   |   |   |  |   |   | NM_006852 | -8.64   | -19.05  | 39% |
| 27125  | AFF4     |   |   |   |  | Y |   | BC025700  | -4.67   | -14.36  | 39% |
| 10652  | YKT6     |   |   |   |  |   |   | NM_006555 | -2.75   | -12.16  | 39% |
| 114885 | OSBPL11  |   |   |   |  |   |   | NM_022776 | -1.89   | -8.18   | 39% |
| 9255   | SCYE1    |   |   |   |  |   | Y | BC014051  | -9.58   | -8.15   | 39% |
| 1020   | CDK5     |   | Y | Y |  |   |   | NM_004935 | -15.94  | -7.36   | 39% |
| 8631   | SKAP1    |   |   |   |  |   |   | BC047870  | -11.06  | -7.28   | 39% |
| 27173  | SLC39A1  |   |   |   |  |   |   | NM_014437 | -11.81  | -6.72   | 39% |
| 1119   | CHKA     |   |   |   |  |   |   | NM_001277 | -11.17  | -5.44   | 39% |
| 10635  | RAD51AP1 |   |   |   |  |   |   | NM_006479 | -23.56  | -5.11   | 39% |
| 1848   | DUSP6    |   |   |   |  |   |   | NM_001946 | -30.47  | -4.95   | 39% |
| 55293  | UEVLD    |   |   |   |  |   |   | BC011011  | -101.00 | -4.26   | 39% |
| 51377  | UCHL5    |   |   |   |  |   |   | BC025369  | -26.61  | -4.24   | 39% |
| 5653   | KLK6     | Y |   | Y |  |   |   | NM_002774 | -27.67  | -3.07   | 39% |
| 22872  | SEC31A   |   |   | Y |  |   |   | BC047883  | 27.50   | 2.22    | 39% |
| 53944  | CSNK1G1  |   |   |   |  |   |   | BC017236  | 20.75   | 2.64    | 39% |
| 1513   | CTSK     |   |   |   |  |   |   | NM_000396 | 35.47   | 2.75    | 39% |
| 10572  | SIVA1    |   |   |   |  |   |   | NM_021709 | 26.67   | 2.82    | 39% |
| 55269  | PSPC1    |   |   |   |  |   |   | NM_018282 | 19.28   | 2.82    | 39% |
| 9099   | USP2     |   | Y |   |  |   |   | BC041366  | 33.39   | 3.01    | 39% |
| 84807  | TA-NFKBH |   |   |   |  |   |   | BC006273  | 24.19   | 3.10    | 39% |
| 8872   | CDC123   |   |   |   |  |   |   | BC001600  | 18.47   | 3.17    | 39% |
| 79689  | STEAP4   |   |   |   |  |   | Y | BC020600  | 25.11   | 3.23    | 39% |
| 2752   | GLUL     |   |   |   |  |   |   | BC031964  | 57.50   | 3.28    | 39% |
| 152926 | PPM1K    |   |   |   |  |   |   | NM_152542 | 17.72   | 3.37    | 39% |

|        |             |   |   |   |  |   |   |           |        |         |     |
|--------|-------------|---|---|---|--|---|---|-----------|--------|---------|-----|
| 3945   | LDHB        |   | Y |   |  |   |   | NM_002300 | 25.83  | 3.52    | 39% |
| 6416   | MAP2K4      |   |   |   |  |   |   | NM_003010 | 10.08  | 3.55    | 39% |
| 7001   | PRDX2       |   |   |   |  |   |   | NM_181738 | 15.97  | 3.67    | 39% |
| 55655  | NLRP2       |   |   |   |  |   |   | BC039269  | 11.97  | 3.71    | 39% |
| 56063  | C1orf91     |   |   |   |  |   |   | BC004885  | 12.36  | 3.93    | 39% |
| 151525 | WDSUB1      |   |   |   |  |   |   | BC029520  | 11.61  | 3.99    | 39% |
| 84900  | TMEM118     |   |   |   |  |   |   | BC011878  | 14.06  | 4.43    | 39% |
| 54886  | RP11-35N6.1 |   | Y | Y |  |   |   | BC022465  | 15.94  | 4.46    | 39% |
| 27161  | EIF2C2      |   |   |   |  |   |   | BC007633  | 10.61  | 4.53    | 39% |
| 183    | AGT         |   | Y | Y |  |   | Y | BC011519  | 8.72   | 4.97    | 39% |
| 5368   | PNOC        |   |   |   |  |   |   | NM_006228 | 10.42  | 5.05    | 39% |
| 29028  | ATAD2       |   |   |   |  | Y | Y | BC019909  | 16.22  | 5.13    | 39% |
| 54867  | FLJ20254    |   |   |   |  |   |   | NM_017727 | 11.56  | 5.34    | 39% |
| 148223 | C19orf25    |   |   |   |  |   |   | BC018441  | 25.39  | 5.38    | 39% |
| 1797   | DOM3Z       |   |   |   |  |   |   | NM_005510 | 12.64  | 5.40    | 39% |
| 2773   | GNAI3       |   |   |   |  |   |   | NM_006496 | 5.17   | 5.47    | 39% |
| 131540 | ZDHHC19     |   |   |   |  |   |   | BC034801  | 12.97  | 5.77    | 39% |
| 9364   | RAB28       |   |   |   |  |   |   | BC035054  | 14.44  | 5.80    | 39% |
| 1155   | TBCB        |   |   |   |  |   |   | BC005969  | 22.53  | 6.01    | 39% |
| 379    | ARL4D       |   |   |   |  |   |   | BC000043  | 11.39  | 6.11    | 39% |
| 9481   | SLC25A27    |   |   |   |  |   |   | BC033091  | 5.22   | 6.22    | 39% |
| 7727   | ZNF174      |   |   |   |  |   |   | BC000876  | 10.17  | 6.30    | 39% |
| 80128  | TRIM46      |   |   |   |  |   |   | BC069568  | 10.69  | 6.30    | 39% |
| 9759   | HDAC4       |   |   |   |  |   |   | BC039904  | 6.47   | 6.51    | 39% |
| 48     | ACO1        |   | Y | Y |  |   |   | NM_002197 | 5.00   | 6.58    | 39% |
| 5292   | PIM1        |   |   |   |  |   |   | NM_002648 | 8.31   | 7.07    | 39% |
| 5316   | PKNOX1      |   |   |   |  |   |   | NM_004571 | 5.89   | 8.31    | 39% |
| 65975  | STK33       |   |   |   |  |   |   | BC031231  | 15.97  | 8.81    | 39% |
| 2701   | GJA4        | Y |   |   |  |   |   | BC027889  | 8.36   | 9.31    | 39% |
| 219333 | USP12       |   |   |   |  |   | Y | NM_182488 | 3.78   | 9.52    | 39% |
| 51673  | CGI-38      | Y |   |   |  |   |   | BC000691  | 5.64   | 10.58   | 39% |
| 9525   | VPS4B       |   |   |   |  |   |   | NM_004869 | 3.69   | 14.40   | 39% |
| 79663  | HSPBAP1     |   |   |   |  |   |   | NM_024610 | 3.94   | 17.55   | 39% |
| 3958   | LGALS3      |   |   |   |  |   | Y | BC001120  | 2.81   | 17.59   | 39% |
| 143187 | VTI1A       | Y |   |   |  |   |   | NM_145206 | 4.69   | 18.80   | 39% |
| 23500  | DAAM2       | Y |   |   |  |   |   | BC047575  | 1.42   | 26.38   | 39% |
| 3856   | KRT8        |   |   |   |  |   |   | BC008200  | 3.53   | 28.90   | 39% |
| 58485  | TRAPPC1     |   |   |   |  |   |   | NM_021210 | 0.67   | 43.27   | 39% |
| 1969   | EPHA2       |   |   |   |  |   | Y | NM_004431 | 0.00   | #DIV/0! | 39% |
| 9324   | HMG3        |   |   | Y |  |   |   | NM_138730 | -8.92  | -4.71   | 33% |
| 55784  | MCTP2       |   |   |   |  |   |   | BC025708  | -21.72 | -3.00   | 33% |
| 7168   | TPM1        |   |   |   |  |   | Y | BC053545  | 87.72  | 4.22    | 33% |
| 10263  | CDK2AP2     |   |   |   |  |   |   | NM_005851 | 23.58  | 4.49    | 33% |
| 5527   | PPP2R5C     |   |   |   |  |   |   | NM_178588 | 6.11   | 4.69    | 33% |
| 2810   | SFN         |   |   |   |  |   |   | NM_006142 | 16.81  | 5.04    | 33% |
| 26003  | GORASP2     |   |   |   |  |   |   | BC001408  | 14.94  | 5.08    | 33% |
| 5173   | PDYN        |   |   |   |  |   |   | NM_024411 | 9.67   | 5.67    | 33% |
| 57019  | CIAPIN1     |   |   |   |  |   |   | BC002568  | 15.47  | 9.42    | 33% |
